# Supplementary material for: Non-withdrawal of beta blockers in acute decompensated chronic and de novo heart failure with reduced ejection fraction in a prospective multicentre study of patients with acute heart failure in the Middle East
Source: PubMed Central journal article supplement — BMJ Open. 2017 Jul 9;7(7):e014915. doi: 10.1136/bmjopen-2016-014915 (PMC5734353; doi:10.1136/bmjopen-2016-014915), 2017-07-09
Supplement: bmjopen-2016-014915.draft_revisions.pdf [file bmjopen-2016-014915.draft_revisions.pdf]

# BMJ Open

## Non-withdrawal of beta-blockers in acute decompensated chronic and de-novo heart failure: Findings from the Gulf aCute heArt failure (GULF-CARE) registry

|                                 |                                                                                                                                                                                                                                                                                                                                                                                                                                                                                                                                                                                                                                                                                                                                                                                                                                                                                                                                                                                                                                                 |
|---------------------------------|-------------------------------------------------------------------------------------------------------------------------------------------------------------------------------------------------------------------------------------------------------------------------------------------------------------------------------------------------------------------------------------------------------------------------------------------------------------------------------------------------------------------------------------------------------------------------------------------------------------------------------------------------------------------------------------------------------------------------------------------------------------------------------------------------------------------------------------------------------------------------------------------------------------------------------------------------------------------------------------------------------------------------------------------------|
| Journal:                        | <i>BMJ Open</i>                                                                                                                                                                                                                                                                                                                                                                                                                                                                                                                                                                                                                                                                                                                                                                                                                                                                                                                                                                                                                                 |
| Manuscript ID                   | bmjopen-2016-014915                                                                                                                                                                                                                                                                                                                                                                                                                                                                                                                                                                                                                                                                                                                                                                                                                                                                                                                                                                                                                             |
| Article Type:                   | Research                                                                                                                                                                                                                                                                                                                                                                                                                                                                                                                                                                                                                                                                                                                                                                                                                                                                                                                                                                                                                                        |
| Date Submitted by the Author:   | 28-Oct-2016                                                                                                                                                                                                                                                                                                                                                                                                                                                                                                                                                                                                                                                                                                                                                                                                                                                                                                                                                                                                                                     |
| Complete List of Authors:       | <p>Abi Khalil, Charbel<br/>           Suliman, Kadhim<br/>           Mahfoud, Ziyad<br/>           Singh, Rajvir; Hamad Medical Corporation (HMC), Cardiology and Cardiothoracic Research Centre, Department of Cardiology and Cardiovascular Surgery,<br/>           Asaad, Nidal; Hamad Medical Corporation (HMC), Cardiology and Cardiothoracic Research Centre, Department of Cardiology and Cardiovascular Surgery,<br/>           AlHabib, Khalid ; King Saud University<br/>           Alsheikh-Ali, Alawi<br/>           Al-Jarallah, Mohammed<br/>           Bulbanat, Bassam<br/>           Al Mahmeed, Wael; Heart and Vascular Institute Cleveland Clinic<br/>           Ridha, Mustafa<br/>           Bazargani, Nooshin<br/>           Amin, Haitham; MKCC, Cardiology<br/>           Al-Motarreb, Ahmed; Sana University, Medicine<br/>           AlFaleh, Husam; King Saud University,<br/>           Elasar, Abdelfatah<br/>           Panduranga, Prashanth<br/>           Al Suwaidi, Jassim; Hamad Medical Corporation,</p> |
| <b>Primary Subject Heading</b>: | Cardiovascular medicine                                                                                                                                                                                                                                                                                                                                                                                                                                                                                                                                                                                                                                                                                                                                                                                                                                                                                                                                                                                                                         |
| Secondary Subject Heading:      | Epidemiology                                                                                                                                                                                                                                                                                                                                                                                                                                                                                                                                                                                                                                                                                                                                                                                                                                                                                                                                                                                                                                    |
| Keywords:                       | Heart failure < CARDIOLOGY, Adult cardiology < CARDIOLOGY, Cardiac Epidemiology < CARDIOLOGY                                                                                                                                                                                                                                                                                                                                                                                                                                                                                                                                                                                                                                                                                                                                                                                                                                                                                                                                                    |
|                                 |                                                                                                                                                                                                                                                                                                                                                                                                                                                                                                                                                                                                                                                                                                                                                                                                                                                                                                                                                                                                                                                 |

SCHOLARONE™  
Manuscripts

1  
2  
3  
4  
5  
6  
7  
8  
9  
10  
11  
12  
13  
14  
15  
16  
17  
18  
19  
20  
21  
22  
23  
24  
25  
26  
27  
28  
29  
30  
31  
32  
33  
34  
35  
36  
37  
38  
39  
40  
41  
42  
43  
44  
45  
46  
47  
48  
49  
50  
51

## Non-withdrawal of beta-blockers in acute decompensated chronic and de-novo heart failure: Findings from the Gulf aCute heArt failure (GULF-CARE) registry.

Charbel Abi Khalil, MD,PhD <sup>1,2,3</sup> \*; Kadhim Sulaiman, MD <sup>4</sup>; Ziyad Mahfoud, PhD <sup>5</sup>; Rajvir Singh, PhD <sup>3</sup>; Nidal Asaad, MBBS <sup>3</sup>; Khalid F AlHabib, MD <sup>6</sup>; Alawi Alsheikh-Ali, MD, MSc <sup>7</sup>; Mohammed Al-Jarallah MBChB <sup>8</sup>; Bassam Bulbanat, MBChB <sup>9</sup>; Wael AlMahmeed, MD <sup>10</sup>; Mustafa Ridha MD <sup>11</sup>; Nooshin Bazargani, MD <sup>12</sup>; Haitham Amin, MD <sup>13</sup>; Ahmed Al-Motarreb, MD <sup>14</sup>; Husam Al Faleh, MD <sup>6</sup>; Abdelfatah Elasar, MD,PhD <sup>15,16</sup>; Prashanth Panduranga, MBBS, MD <sup>4</sup>; Jassim Al Suwaidi, MBChB <sup>3</sup>, on behalf of the GULF-CARE group.

1- Department of Medicine. Weill Cornell Medicine-Qatar.

2- Department of Genetic Medicine. Weill Cornell Medicine-Qatar.

3- Adult Cardiology, Heart Hospital, Hamad Medical Corporation, Doha, Qatar.

5- Division of Global and Public Health. Weill Cornell Medicine-Qatar

5-National Heart Center, Royal Hospital, Muscat, Oman.

6- Department of Cardiac Sciences, King Fahad Cardiac Center, King Saud University, Riyadh, Saudi Arabia.

7- Department of Cardiology, Sheikh Khalifa Medical City, Abu Dhabi, United Arab Emirates.

8- Department of Cardiology, Sabah Al-Ahmed Cardiac Center, Kuwait.

9- Department of Medicine, Al-Amiri Hospital, Kuwait City, Kuwait.

10- Heart and Vascular Institute. Cleveland Clinic-Abu Dhabi, UAE.

11- Department of Cardiology, Adan Hospital, Kuwait.

12- Department of Cardiology, Dubai hospital, Dubai, United Arab Emirates.

13- Department of Cardiology, Mohammed Bin Khalifa Cardiac Center, Manamah, Bahrain.

14- Department of Cardiology, Faculty of Medicine, Sana'a University, Sana'a, Yemen.

15- King Fahad Medical City, Riyadh, Saudi Arabia.

16- Cardiology Department, Tanta University, Egypt.

52 \* Corresponding author: Charbel Abi Khalil. MD, PhD, FESC, FACC. Weill Cornell Medicine-Qatar. PO  
53 box 24144. Doha-Qatar. Email: [cha2022@med.cornell.edu](mailto:cha2022@med.cornell.edu)  
54  
55  
56  
57  
58  
59  
60

## Abstract

**Objectives:** Beta-blockers reduce mortality in heart failure (HF). However, it is not clear whether they should be temporarily withdrawn during acute heart failure (AHF).

**Design:** Analysis of prospectively collected data

**Setting:** The Gulf CARE (Gulf aCute heArt failuRe rEgistry) is a prospective multicenter study of patients hospitalized with acute heart failure in 7 Middle Eastern countries.

**Participants:** 5005 patients with AHF.

**Outcome measures:** We studied the effect of beta-blockers withdrawal on intra-hospital, 3-month and 12-month mortality and hospitalization for HF in patients with acute decompensated chronic heart failure (ADCHF) and acute de-novo heart failure (ADNHF), and a LVEF < 40%.

**Results:** Intra-hospital mortality was lower in patients whose beta-blocker therapy was not withdrawn in both the ADCHF and ADNHF groups. This protective effect persisted after multivariate analysis (OR 0.05, 95% CI [0.02-0.11]; OR 0.04, 95% CI [0.01-0.16]; respectively,  $p < 0.001$  for both) and propensity score matching (OR 0.08, 95% CI [0.01-0.46]; OR 0.04, 95% CI [0.01-0.16]; respectively,  $p < 0.006$  for both). At 3 months, mortality was still lower only in ADCHF patients in whom beta-blockers were maintained during initial hospitalization. However, the benefit was lost after correcting for confounding factors. Interestingly, hospitalization for HF and length of hospital stay were unaffected by beta-blockers discontinuation in all patients.

**Conclusion:** In summary, non-withdrawal of beta-blockers in ADCHF and ADNHF is associated with lower short-term mortality.

**Trial registration number:** NCT01467973.

## Keywords

Heart failure, Beta-blockers, Acute decompensated chronic heart failure, Acute de-novo heart failure.

## Strengths and limitations of this study

This is the first study to assess non-withdrawal of beta-blockers in de-novo heart failure.

Like any observational study, selection bias could exist. Moreover, the decision of beta-blockers withdrawal during acute heart failure could have been to different factors that we didn't account for in our analysis.

Furthermore, no information was available regarding the dose of beta-blockers; in particular whether the dose was reduced in patients who continued to have beta-blockers during acute decompensation.

## Introduction

Since the publication of the MERIT-HF and CIBIS-II trials<sup>1 2</sup>, in which beta-blockers improved survival in chronic heart failure (CHF), international guidelines recommended using this drug class as first-line treatment in CHF along with the renin-angiotensin system blockers<sup>3</sup>. Initial safety concerns regarding the use of beta-blockers in patients with CHF were dropped with the emergence of several studies that demonstrated up to 30% decrease in mortality and other clinical endpoints in those patients<sup>4</sup>. Despite the improvement in the treatment and prognosis of CHF, acute heart failure (AHF) remains a challenging condition, treatment of which is essentially symptomatic. In the EuroHeart Failure Survey II, in-hospital mortality of patients with AHF was about 7%<sup>5</sup>, and one-year mortality above 20%<sup>6</sup>. The continuation of beta-blockers during AHF remains controversial and subject to clinical judgment. The Beta-blocker CONTinuation Vs. INTerruption in patients with Congestive heart failure hospitalizED for a decompensation episode (B-CONVINCED) trial, a randomized, controlled, open-labeled study that compared continuation *versus* withdrawal of beta-blockers during an AHF event did not report any short-term or long-term benefit in patients assigned to continue their treatment<sup>7</sup>. In a post-hoc analysis of the Survival of Patients With Acute Heart Failure in Need of Intravenous Inotropic Support (SURVIVE) study that had a similar design to B-CONVINCED, 1-month and 3-month mortality were decreased in patients whose beta-blockers was not withdrawn during initial hospitalization<sup>8</sup>. However, the protective effect was lost after correcting for classical heart failure covariates.

Currently, there is no large-scale data from the Middle East with regard to beta-blockers use in heart failure. The aim of this paper is to report on use of beta-blockers in patients admitted with acute heart failure and to assess short-term and long-term consequences of withdrawal or continuation of beta-blockers in heart failure patients with left ventricular dysfunction in the Middle East.

## Methods

1  
2  
3 The Gulf CARE (Gulf aCute heArt failuRe registry) is a multinational multicenter prospective  
4 observational acute heart failure survey based on cases admitted to various hospitals in 7 countries  
5 from the Gulf Middle East, namely Oman, Saudi Arabia, United Arab Emirates (UAE), Qatar, Bahrain,  
6 Yemen, and Kuwait. Details of the recruitment of patients, the study design and methods have been  
7 published previously<sup>9 10</sup>. In brief, we collected data, as per the case report form, of patients with acute  
8 heart failure from both genders who were above 18 years of age admitted to the participating hospitals.  
9 Recruitment started in February 2012 and ended on November 13, 2012. This was preceded by a pilot  
10 phase of 1 month in November 2011. The registry continued to follow-up patients at 3 months and 1  
11 year. The registry protocol was approved by each participating center's institutional review board and  
12 the study was registered at clinicaltrials.gov with number NCT01467973. A written informed consent  
13 was obtained from all patients  
14  
15  
16  
17  
18  
19  
20  
21  
22  
23  
24  
25  
26  
27

28 AHF was further classified as either acute decompensated chronic heart failure (ADCHF) or  
29 acute de-novo heart failure (ADNHF). ADCHF was defined as worsening of HF in patients with a  
30 previous diagnosis or hospitalization for heart failure. ADNHF was defined as AHF in patients with no  
31 prior history of heart failure. All patients were followed-up at 3 months by telephone, and at 1 year  
32 either by telephone or by a clinic visit. The registry data was collected on-line using a dedicated Web-  
33 site including demographics, risk factors, medical history, clinical manifestations, investigations,  
34 medications with dose and management. The participating hospitals ranged from secondary care  
35 hospitals to tertiary care hospitals with interventional facilities including device therapy.  
36  
37  
38  
39  
40  
41  
42  
43  
44  
45

46 The inclusion criteria for this analysis was those patients who were on beta-blockers at admission and  
47 had a left ventricular ejection fraction (LVEF) < 40%. Those patients with preserved left ventricular  
48 function and not on beta-blockers at admission were excluded from further analysis. Furthermore, 2  
49 cohorts were created: The first cohort—those with ADCHF and the second cohort—those with ADNHF.  
50  
51  
52  
53  
54  
55 The main outcome measures were mortality, hospitalization for HF, and length of hospital stay.  
56  
57  
58  
59  
60

1  
2  
3 Baseline categorical variables and outcome measures were summarized using frequency distributions  
4  
5  
6  
7  
8  
9  
10  
11  
12  
13  
14  
15  
16  
17  
18  
19  
20  
21  
22  
23  
24  
25  
26  
27  
28  
29  
30  
31  
32  
33  
34  
35  
36  
37  
38  
39  
40  
41  
42  
43  
44  
45  
46  
47  
48  
49  
50  
51  
52  
53  
54  
55  
56  
57  
58  
59  
60

Baseline categorical variables and outcome measures were summarized using frequency distributions while means and standard deviations were used for numeric variables. Outcome measures and baseline patients' characteristics were compared between the two groups: withdrawal and non-withdrawal of beta-blockers using the Chi-squared test (or Fisher's exact test when expected cell counts fell below 5) for categorical variables and the student's t test or Wilcoxon rank sum test for numeric variables. Multivariate logistic regression analysis performed for in-hospital and 3-months included variables that were significantly difference between the two groups in addition to age and gender. Adjusted Odds Ratios (OR) and 95% Confidence intervals with p values are presented in tables. All analyses were done separately for the ADCHF and ADNHF patients. In addition, several sensitivity analyses were performed. Propensity scores were computed using logistic regression with membership in the two groups as the outcome and baseline variables that were significantly different between the groups as the independent variables. These scores were used to adjusted the association between the mortality outcomes and the main variable (membership in each group) using multivariate logistic regression. Moreover, propensity score matching using the most influential variable (Inotropes) was used and the main comparison between the two groups was assessed with and without adjustment to variables that were still significantly different between the two groups even after matching. This latter analysis was not done for the ADNHF groups as the sample sizes became small after matching. Statistical significance was set at the 5% level. All analyses were done using IBM-SPSS version 23.0.

## Results:

Out of the total 5005 participants in the GULF-CARE, 2208 (44.1%) patients were already on beta-blockers on inclusion. Among those, 1278 patients (57.8%) had a LVEF <40%. Further, 1018(79.9%) were diagnosed with acute decompensated chronic HF (ADCHF) and 260 (20.4%) with acute do-novo heart failure (ADNHF). As shown in table 1, Patients with ADCHF tended to have more comorbidities than patients with ADNHF. They had a higher prevalence of coronary artery disease

1  
2  
3 (CAD), chronic kidney disease (CKD), valvular heart disease, atrial fibrillation (AF) and a lower LVEF;  
4  
5 which could explain the more common use of angiotensin receptor antagonists (ARBs), aldosterone  
6  
7 antagonists, vitamin K antagonists (VKA) and diuretics in these patients. Interestingly, they smoked  
8  
9 less, a phenomenon that could be due to the effect of earlier life-style changes and anti-smoking  
10  
11 campaigns in patients with CHF.  
12

13  
14  
15 Beta-blockers were withdrawn in 10% of the patients in the ADCHF group and 13.8% in the ADNHF  
16  
17 group. Those ADCHF patients in whom beta-blockers were discontinued had a lower blood pressure at  
18  
19 inclusion and half of them required inotropic support during hospitalization (**supplementary table 1**).  
20  
21 ADNHF patients who continued beta-blockade therapy were more commonly prescribed ACE-inhibitors  
22  
23 and required less inotropic support (**supplementary table 2**).  
24  
25

26  
27  
28 In the ADCHF group, 15(1.6%) in-hospital deaths occurred in patients whose beta-blocker therapy was  
29  
30 not withdrawn as compared to 37(40.2%) when beta-blocker was discontinued ( $p<0.001$ ) (**Table 2**).  
31  
32 Multivariate analysis showed that age, gender, non-compliance to medication, SBP, DBP, creatinin and  
33  
34 statins were not predictors of in-hospital mortality in case of non-withdrawal of beta-blockers. As  
35  
36 expected, inotropic use was significantly associated with higher mortality in our model (**Table 3**).  
37  
38 Nevertheless, non-withdrawal of beta-blockers was associated with less mortality risk even after  
39  
40 correcting for all the parameters age and other parameters (OR=0.05, 95% CI: 0.022-0.112,  $p<0.001$ ).  
41  
42 To confirm our findings, we performed a propensity score matching on inotropic use (**supplementary**  
43  
44 **table 3**). Non-withdrawal of Beta-blockers was associated with less mortality in the propensity model  
45  
46 (OR=0.05, 95% CI: 0.015-0.170,  $p<0.001$ ), even after correcting for variables that remained  
47  
48 significantly different in the new model (OR=0.084, 95% CI: 0.015-0.468,  $p=0.005$ ). At 3 months, fewer  
49  
50 deaths also occurred in the group of patients whose beta-blockers therapy was not withdrawn ( $p=$   
51  
52 0.038). However, after multivariate logistic regression analysis, the protection conferred by beta-  
53  
54 blockade continuation was lost (OR=0.513, 95% CI: 0.231-1.143,  $p=0.10$ )  
55  
56  
57  
58  
59  
60



1  
2  
3 In the ADNHF group, 5(2.2%) in-hospital deaths occurred in patients whose beta-blocker therapy was  
4 not withdrawn as compared to 17(47.2%) when beta-blocker was discontinued ( $p<.001$ ). However,  
5 mortality rates were comparable at 3 months and one year (**Table 4**). Multivariate analysis didn't show  
6 that age, gender or Ace-inhibitors- which were different among both groups- predicted mortality (**Table**  
7 **5**). Similarly, to the ADCHF, inotropic use was highly associated with mortality. We also performed a  
8 propensity score matching on inotropic use (**supplementary table 4**) and confirmed that beta-blockers  
9 continuation in ADNHF has a favorable outcome (OR=0.05, 95% CI: 0.015-0.170,  $p<0.001$ ), even after  
10 correcting for variables that remained significantly different along both groups in the new model  
11 (OR=0.047, 95% CI: 0.013-0.169,  $p<0.001$ ). Similarly to patients with ADCHF, hospitalization for heart  
12 failure and length of stay were unaffected by the withdrawal of beta-blockers.  
13  
14  
15  
16  
17  
18  
19  
20  
21  
22  
23  
24  
25

## 26 Discussion

27  
28  
29

30 This observational study demonstrates that pursuing beta-blocker therapy during acute heart  
31 failure confers to patients with chronic and de-novo heart failure cardiovascular protection and  
32 decreases mortality. Interestingly, randomized placebo-controlled trials that assessed pursuing beta-  
33 blockers versus withdrawal during AHF are missing; available data are extrapolated from post-hoc  
34 analysis. The B-convinced was designed as a non-inferiority trial and demonstrated only safety of beta-  
35 blockers during acute decompensation<sup>7</sup>. In a retrospective analysis of the SURVIVE study that initially  
36 assessed 2 inotropic treatments in critical patients with acute HF, the benefit associated with non-  
37 withdrawal of beta-blockers was lost after correcting for heart failure covariates; only patients who  
38 never received beta-blockers had a worse outcome as compared to patients who were on these drugs  
39 at inclusion and on discharge<sup>8</sup>. In a sub-analysis of the Evaluation Study of Congestive Heart Failure  
40 and Pulmonary Artery Catheterization (ESCAPE) that assessed pulmonary artery catheter use among  
41 patients admitted with acute HF, patients already prescribed beta-blockers on admission of acute heart  
42 failure had a lower 6-month mortality risk and a shorter hospitalization stay<sup>11</sup>. Outcomes of the  
43  
44  
45  
46  
47  
48  
49  
50  
51  
52  
53  
54  
55  
56  
57  
58  
59  
60

1  
2  
3 Prospective Trial of Intravenous Milrinone for Exacerbations of Chronic Heart Failure (OPTIME-CHF),  
4  
5 designed as a randomized placebo-controlled trial, failed to test the superiority of milrinone to placebo  
6  
7 in patients with ADCHF<sup>12</sup>. Further observational analysis showed that withdrawal of beta-blockers was  
8  
9 associated with a greater risk of 2-month mortality and re-hospitalization for HF despite limitations due  
10  
11 to the use of milrinone in those patients and the small number of patients analyzed<sup>13</sup>.

12  
13  
14 Our results are comparable to previous observational studies from North America and Europe. In the  
15  
16 Italian Survey on Acute Heart Failure, withdrawal of beta-blockers during acute HF was associated with  
17  
18 almost 4-fold increase in the risk of intra-hospital mortality<sup>14</sup>. The OPTIMIZE-HF (Organized Program to  
19  
20 Initiate Lifesaving Treatment in Hospitalized Patients with Heart Failure) is one of the largest Northern  
21  
22 American registries of patients admitted for acute HF. Maintenance of beta-blockers during acute  
23  
24 decompensation was associated with better outcome in post-discharge mortality<sup>15</sup>. Consistent with our  
25  
26 findings, in a recent meta-analysis that included over 2700 patients treated with beta-blockers and  
27  
28 hospitalized for AHF, withdrawal of beta-blockers significantly increased in-hospital and short term  
29  
30 mortality, and re-hospitalization for heart failure<sup>16</sup>.

31  
32  
33  
34  
35 It is not known why withdrawal of beta-blockers in acute decompensated heart failure is associated with  
36  
37 a worse prognosis. Activation of the sympathetic system, increase of catecholamine levels and  
38  
39 alterations in cardiac  $\beta$ -receptors are the hallmark of chronic heart failure; therefore beta-blocker  
40  
41 therapy in CHF could limit the deleterious effect of chronic  $\beta$ -receptor stimulation such as arrhythmias,  
42  
43 hypertrophy and cardiomyocytes apoptosis<sup>17</sup>. It may be possible that withdrawal of beta-blockers in the  
44  
45 acute phase takes away earlier protective effect of beta-adrenergic inhibition at a time when the neuro-  
46  
47 hormonal system is activated and catecholamines are significantly increased<sup>18</sup>.

48  
49  
50  
51 Managing beta-blockers during acute heart failure is still unclear to most physicians. The European  
52  
53 Society of Cardiology (ESC)<sup>19</sup> and the American college of Cardiology foundation (ACCF)/American  
54  
55 heart association (AHA)<sup>20</sup> latest guidelines recommend initiating a beta-blocker therapy following AHF  
56  
57  
58  
59  
60

1  
2  
3 as soon as the patient is stable and before discharge. However, uncertainty persists in regards to  
4  
5 continuing beta-blockers during an acute decompensation.  
6  
7

8  
9 It is not known why mortality risk reduction extends up to 3 months in ADCHF but not in ADNHF  
10 although the first group has higher cardiovascular comorbidities and more severe risk factors. One  
11 explanation could be the higher prescription of cardioprotective drugs such as ACE inhibitors, ARBs,  
12 diuretics; all having shown to reduce mortality in patients with CHF and improve the outcome<sup>21-23</sup>. One  
13 other explanation would also be the frequent use of beta-blockers approved for heart failure in patients  
14 with ADCHF whereas the prescription of non-HF selective beta-blockers such as atenolol was more  
15 common in ADNHF. Finally, we cannot rule out that the relatively small number of patients with  
16 ADNHF, coupled to an even smaller death rate at 3 months, does not enable us draw any meaningful  
17 conclusions on long-term mortality in those patients.  
18  
19

20  
21 Our study has few limitations. Like any observational study, selection bias could exist. The decision of  
22 beta-blockers withdrawal during acute heart could have been to different factors that we didn't account  
23 for in our analysis. For example, beta-blocker therapy could have been stopped in the more severe  
24 patients with a poor prognosis. In addition, we couldn't determine whether the dosage of beta-blockers  
25 on admission, or any reduction during hospitalization, might have influenced the outcome. Finally, the  
26 duration of beta-blocker treatment prior to the acute heart failure event was not recorded; this variable  
27 could also be a covariate since long-term beta-blocker treatment could have been more beneficial than  
28 short-term.  
29  
30  
31  
32  
33  
34  
35  
36  
37  
38  
39  
40  
41  
42  
43  
44  
45

## 46 47 **Conclusion**

48  
49  
50  
51 Our study suggests non-withdrawal of beta-blocker therapy during acute decompensated heart  
52 failure reduces short-term mortality risk in patients with acute decompensated chronic and de-novo  
53 heart failure; findings that could only validated in randomized controlled trials.  
54  
55  
56  
57  
58  
59  
60

## References:

1. Effect of metoprolol CR/XL in chronic heart failure: Metoprolol CR/XL Randomised Intervention Trial in Congestive Heart Failure (MERIT-HF). *Lancet* 1999;353(9169):2001-7.
2. The Cardiac Insufficiency Bisoprolol Study II (CIBIS-II): a randomised trial. *The Lancet* 1999;353(9146):9-13. doi: 10.1016/s0140-6736(98)11181-9
3. Yancy CW, Jessup M, Bozkurt B, et al. 2013 ACCF/AHA guideline for the management of heart failure: executive summary: a report of the American College of Cardiology Foundation/American Heart Association Task Force on practice guidelines. *Circulation* 2013;128(16):1810-52. doi: 10.1161/CIR.0b013e31829e8807
4. Foody JM, Farrell MH, Krumholz HM. beta-Blocker therapy in heart failure: scientific review. *JAMA* 2002;287(7):883-9.
5. Nieminen MS, Brutsaert D, Dickstein K, et al. EuroHeart Failure Survey II (EHFS II): a survey on hospitalized acute heart failure patients: description of population. *Eur Heart J* 2006;27(22):2725-36. doi: 10.1093/eurheartj/ehl193
6. Harjola VP, Follath F, Nieminen MS, et al. Characteristics, outcomes, and predictors of mortality at 3 months and 1 year in patients hospitalized for acute heart failure. *Eur J Heart Fail* 2010;12(3):239-48. doi: 10.1093/eurjhf/hfq002
7. Jondeau G, Neuder Y, Eicher JC, et al. B-CONVINCED: Beta-blocker CONTinuation Vs. INTerruption in patients with Congestive heart failure hospitalized for a decompensation episode. *Eur Heart J* 2009;30(18):2186-92. doi: 10.1093/eurheartj/ehp323
8. Bohm M, Link A, Cai D, et al. Beneficial association of beta-blocker therapy on recovery from severe acute heart failure treatment: data from the Survival of Patients With Acute Heart Failure in Need of Intravenous Inotropic Support trial. *Crit Care Med* 2011;39(5):940-4. doi: 10.1097/CCM.0b013e31820a91ed
9. Sulaiman K, Panduranga P, Al-Zakwani I, et al. Clinical characteristics, management, and outcomes of acute heart failure patients: observations from the Gulf acute heart failure registry (Gulf CARE). *Eur J Heart Fail* 2015;17(4):374-84. doi: 10.1002/ejhf.245
10. Sulaiman KJ, Panduranga P, Al-Zakwani I, et al. Rationale, Design, Methodology and Hospital Characteristics of the First Gulf Acute Heart Failure Registry (Gulf CARE). *Heart Views* 2014;15(1):6-12. doi: 10.4103/1995-705X.132137
11. Butler J, Young JB, Abraham WT, et al. Beta-blocker use and outcomes among hospitalized heart failure patients. *J Am Coll Cardiol* 2006;47(12):2462-9. doi: 10.1016/j.jacc.2006.03.030
12. Cuffe MS, Califf RM, Adams KF, Jr., et al. Short-term intravenous milrinone for acute exacerbation of chronic heart failure: a randomized controlled trial. *JAMA* 2002;287(12):1541-7.
13. Gattis WA, O'Connor CM, Leimberger JD, et al. Clinical outcomes in patients on beta-blocker therapy admitted with worsening chronic heart failure. *Am J Cardiol* 2003;91(2):169-74.
14. Orso F, Baldasseroni S, Fabbri G, et al. Role of beta-blockers in patients admitted for worsening heart failure in a real world setting: data from the Italian Survey on Acute Heart Failure. *Eur J Heart Fail* 2009;11(1):77-84. doi: 10.1093/eurjhf/hfn008
15. Fonarow GC, Abraham WT, Albert NM, et al. Influence of beta-blocker continuation or withdrawal on outcomes in patients hospitalized with heart failure: findings from the OPTIMIZE-HF program. *J Am Coll Cardiol* 2008;52(3):190-9. doi: 10.1016/j.jacc.2008.03.048
16. Prins KW, Neill JM, Tyler JO, et al. Effects of Beta-Blocker Withdrawal in Acute Decompensated Heart Failure: A Systematic Review and Meta-Analysis. *JACC Heart Fail* 2015;3(8):647-53. doi: 10.1016/j.jchf.2015.03.008
17. Lohse MJ, Engelhardt S, Eschenhagen T. What is the role of beta-adrenergic signaling in heart failure? *Circ Res* 2003;93(10):896-906. doi: 10.1161/01.RES.0000102042.83024.CA
18. Onwuanyi A, Taylor M. Acute decompensated heart failure: pathophysiology and treatment. *Am J Cardiol* 2007;99(6B):25D-30D. doi: 10.1016/j.amjcard.2006.12.017
19. McMurray JJ, Adamopoulos S, Anker SD, et al. ESC guidelines for the diagnosis and treatment of acute and chronic heart failure 2012: The Task Force for the Diagnosis and Treatment of Acute and Chronic Heart Failure 2012 of the European Society of Cardiology. Developed in collaboration with the Heart Failure Association (HFA) of the ESC. *Eur J Heart Fail* 2012;14(8):803-69. doi: 10.1093/eurjhf/hfs105
20. Writing Committee M, Yancy CW, Jessup M, et al. 2013 ACCF/AHA guideline for the management of heart failure: a report of the American College of Cardiology Foundation/American Heart Association Task Force on practice guidelines. *Circulation* 2013;128(16):e240-327. doi: 10.1161/CIR.0b013e31829e8776

- 1
  - 2
  - 3
  - 4
  - 5
  - 6
  - 7
  - 8
  - 9
  - 10
  - 11
  - 12
  - 13
  - 14
  - 15
  - 16
  - 17
  - 18
  - 19
  - 20
  - 21
  - 22
  - 23
  - 24
  - 25
  - 26
  - 27
  - 28
  - 29
  - 30
  - 31
  - 32
  - 33
  - 34
  - 35
  - 36
  - 37
  - 38
  - 39
  - 40
  - 41
  - 42
  - 43
  - 44
  - 45
  - 46
  - 47
  - 48
  - 49
  - 50
  - 51
  - 52
  - 53
  - 54
  - 55
  - 56
  - 57
  - 58
  - 59
  - 60
21. Granger CB, McMurray JJ, Yusuf S, et al. Effects of candesartan in patients with chronic heart failure and reduced left-ventricular systolic function intolerant to angiotensin-converting-enzyme inhibitors: the CHARM-Alternative trial. *Lancet* 2003;362(9386):772-6. doi: 10.1016/S0140-6736(03)14284-5
22. Effect of enalapril on survival in patients with reduced left ventricular ejection fractions and congestive heart failure. The SOLVD Investigators. *N Engl J Med* 1991;325(5):293-302. doi: 10.1056/NEJM199108013250501
23. Taylor AL, Ziesche S, Yancy C, et al. Combination of isosorbide dinitrate and hydralazine in blacks with heart failure. *N Engl J Med* 2004;351(20):2049-57. doi: 10.1056/NEJMoa042934

For peer review only

**Footnotes**

Contribution: KS, KFA, NA, AA-A, MA-J, BB, WA, MR, NB, HA, AA-M, HAF, AE, PP and JAS were involved in the design of the Gulf CARE registry and patient enrolment and ensuring quality control of the study. CAK designed the analysis and wrote the manuscript. ZM and RS carried out the statistical analyses. All authors approved the final version of the manuscript.

Funding: Gulf CARE is an investigator-initiated study conducted under the auspices of the Gulf Heart Association and funded by Servier, Paris, France; and (for centres in Saudi Arabia) by the Saudi Heart Association.

Competing interests: None.

**Table 1:** Baseline characteristics of patients on beta-blockers on admission and a left ventricular ejection fraction <40% included in the Gulf-Care.

|                               | All patients in Gulf Care<br>N=5005 | Patients with ADCHF and beta-blockers, and a LVEF <40%<br>N=1018 | Patients with ADNHF and beta-blockers, and a LVEF<40%<br>N=260 | p value * |
|-------------------------------|-------------------------------------|------------------------------------------------------------------|----------------------------------------------------------------|-----------|
| Age (years)                   | 59±15                               | 61.0±13.9                                                        | 59.8±13.8                                                      | 0.21      |
| Male gender                   | 3131(62.6%)                         | 751(73.8%)                                                       | 177(68.1%)                                                     | 0.07      |
| BMI (kg/m <sup>2</sup> )      | 28±6                                | 27.7±5.8                                                         | 28.1±5.7                                                       | 0.26      |
| Hypertension                  | 3059(61.1%)                         | 673(66.1%)                                                       | 181(69.6%)                                                     | 0.29      |
| Diabetes Mellitus             | 2492(49.8%)                         | 569(55.9%)                                                       | 147(56.5%)                                                     | 0.86      |
| Hyperlipidemia                | 1799(35.9%)                         | 464(45.6%)                                                       | 106(40.8%)                                                     | 0.16      |
| Smoking                       | 1103(22%)                           | 162(15.9%)                                                       | 67 (25.8%)                                                     | 0.001     |
| <b>Race</b>                   |                                     |                                                                  |                                                                |           |
| Arabs                         | 4516(90.2%)                         | 937 (92.0%)                                                      | 232(89.2%)                                                     | 0.04      |
| Asians                        | 473(9.5%)                           | 77(7.6%)                                                         | 28(10.8%)                                                      |           |
| Others                        | 16(0.3%)                            | 4(0.4%)                                                          | -                                                              |           |
| <b>Past – medical history</b> |                                     |                                                                  |                                                                |           |
| Known CAD                     | 2337(46.7%)                         | 676(66.4%)                                                       | 150(57.7%)                                                     | 0.008     |
| Stroke /TIAs                  | 404(8%)                             | 96(9.4%)                                                         | 29(11.2%)                                                      | 0.40      |
| Valvular heart disease        | 675(13.5%)                          | 154(15.1%)                                                       | 19(7.3%)                                                       | 0.001     |
| Atrial fibrillation           | 607(12%)                            | 170(16.7%)                                                       | 23(8.8 %)                                                      | 0.001     |
| CKD                           | 744(14.9%)                          | 215(21.1%)                                                       | 28(10.8%)                                                      | 0.001     |
| <b>Etiology</b>               |                                     |                                                                  |                                                                |           |
| Non-Compliance Medication     | 964(19%)                            | 300(29.5%)                                                       | 40(15.4%)                                                      | 0.05      |
| IHD                           | 1365(27%)                           | 204(20,0%)                                                       | 117(45.0%)                                                     | 0.67      |
| HTN                           | 410(8.2%)                           | 46(4.5%)                                                         | 12(4.6%)                                                       | 0.26      |
| Arrhythmia                    | 301(6%)                             | 61(6.0%)                                                         | 11(4.2%)                                                       | 0.49      |
| Anemia                        | 143(3.1%)                           | 23(2.3%)                                                         | 5(1.9%)                                                        | 0.50      |

|                                            |             |             |             |       |
|--------------------------------------------|-------------|-------------|-------------|-------|
| Renal failure                              | 221(4.4%)   | 58(5.7%)    | 9(3.5%)     | 0.19  |
| <b>Clinical and biochemical parameters</b> |             |             |             |       |
| HR, b.p.m                                  | 77.6±12.8   | 94.4±22.4   | 94.6±22.3   | 0.92  |
| SBP, mmHg                                  | 118±18      | 126.6±30.6  | 133.6±32.4  | 0.002 |
| DBP, mmHg                                  | 70±12       | 76.4±17.9   | 80.5±19.3   | 0.001 |
| LVEF (%)                                   | 36.9±14     | 26.6±7.1    | 28.8±7.2    | 0.001 |
| BNP, pg/mL                                 | 5324±4523   | 6847±9679   | 5227±4924   | 0.21  |
| Creatinin, mmol/L                          | 130±116     | 137.7±116.3 | 128.5±121.9 | 0.24  |
| <b>Medications</b>                         |             |             |             |       |
| Carvedilol                                 | 1099(21.9%) | 649(63.8%)  | 100 (38.5%) | 0.001 |
| Bisoprolol                                 | 626 (12.5%) | 286 (28.1%) | 90 (34.6%)  | 0.04  |
| Metoprolol                                 | 299 (5.9%)  | 64 (6.3%)   | 35 (13.5%)  | 0.001 |
| Atenolol                                   | 184 (3.6%)  | 19 (1.9%)   | 35 (13.5%)  | 0.001 |
| ACE-inhibitors                             | 2762(55.2%) | 652(64.0%)  | 166(63.8%)  | 0.96  |
| ARBs                                       | 645(12.9%)  | 180(17.7%)  | 23(8.8%)    | 0.001 |
| Statins                                    | 2555(51%)   | 751 (73.8%) | 180(69.2%)  | 0.14  |
| Aspirin                                    | 3089(61.7%) | 832 (81.7%) | 204(78.5%)  | 0.23  |
| VKA                                        | 618(12%)    | 221(21.7%)  | 19(7.3%)    | 0.001 |
| Ibravadine                                 | 115(2.3%)   | 48(4.7%)    | 7(2.7%)     | 0.15  |
| Aldosterone antagonists                    | 840(16.8%)  | 419(41.2%)  | 45(17.3%)   | 0.001 |
| Clopidogrel                                | 966(19%)    | 301(29.6%)  | 81(31.2%)   | 0.61  |
| Diuretics                                  | 2882(57.6%) | 920(90.4%)  | 113(43.5%)  | 0.001 |
| Inotrops use during hospitalization        | 783 (16%)   | 156 (15.3%) | 51 (19.6%)  | 0.96  |

All values are given as n (%) or mean ±SD. \* p value: patients with acute decompensated chronic heart failure and LVEF <40% on beta-blockers on admission vs. de – Novo heart failure and LVEF <40% on beta-blockers on admission. ADCHF = Acute decompensated chronic heart failure, ADNHF = Acute de-novo heart failure, BMI=body mass index, CAD= coronary artery disease, TIAs=transient ischemic attacks, CKD=chronic kidney disease, HR=heart rate, SBP= systolic blood pressure, DBP= diastolic blood pressure, LVEF = Left ventricular ejection fraction, VKA= Vitamin K antagonists, ARBs= Angiotensin receptor blockers.



**Table 2:** Effect of non-withdrawal of beta-blockers in acute decompensated chronic heart failure with beta-blocker therapy on admission and a LVEF <40%

|                            | All patients with acute decompensated heart failure, LVEF <40% and on beta-treatment on admission<br>N=1018 | Patients with acute decompensated heart failure and beta-blockers (not withdrawn during the acute stage)<br>N=926(91%) | Patients with acute decompensated heart failure (previous beta-blockers intake and stopped during the active phase)<br>N=92(9.0%) | p- value |
|----------------------------|-------------------------------------------------------------------------------------------------------------|------------------------------------------------------------------------------------------------------------------------|-----------------------------------------------------------------------------------------------------------------------------------|----------|
| <b>In-hospital outcome</b> |                                                                                                             |                                                                                                                        |                                                                                                                                   |          |
| Death                      | 52/1018(5.1%)                                                                                               | 15/926(1.6%)                                                                                                           | 37/92(40.2%)                                                                                                                      | <0.001*  |
| Length of stay             | 9.9±15.0                                                                                                    | 9.7±15.1                                                                                                               | 12.3±13.6                                                                                                                         | 0.1      |
| <b>3 months follow-up</b>  |                                                                                                             |                                                                                                                        |                                                                                                                                   |          |
| Death                      | 86/946(9.1%)                                                                                                | 77/896(8.6%)                                                                                                           | 9/50(18.0%)                                                                                                                       | 0.038    |
| Hospitalization for HF     | 219/859(25.5%)                                                                                              | 204/818(24.9%)                                                                                                         | 15/41(36.6%)                                                                                                                      | 0.09     |
| Length of stay (days)      | 8.1±7.6                                                                                                     | 8.1±7.8                                                                                                                | 7.7±4.3                                                                                                                           | 0.86     |
| <b>At 1 year follow-up</b> |                                                                                                             |                                                                                                                        |                                                                                                                                   |          |
| Death                      | 139/880(15.8%)                                                                                              | 128/835(15.3%)                                                                                                         | 11/45(24.4%)                                                                                                                      | 0.10     |
| Hospitalization for HF     | 333/741 (44.9%)                                                                                             | 316/707 (44.7%)                                                                                                        | 17/34 (50.0%)                                                                                                                     | 0.54     |
| Length of stay (days)      | 9.6±12.0                                                                                                    | 9.6±12.1                                                                                                               | 10.9±11.1                                                                                                                         | 0.73     |

The frequencies and percentages for death, hospitalization for heart failure (HF) and length of stay during hospitalization. Death rates were cumulative. All values are given as n (%) or mean ±SD.

**Table 3:** Multivariate analysis for intra-hospital and 3-month mortality in patients with ACDHF, a LVEF <40% and beta-blockers on admission.

|                              | Variable                     | OR          | 95% .C.I     | P value |
|------------------------------|------------------------------|-------------|--------------|---------|
| <b>In-hospital mortality</b> | Age                          | 1.022       | 0.991-1.055  | 0.17    |
|                              | Gender                       | 1.058       | 0.428-2.618  | 0.90    |
|                              | Non-compliance to medication | 1.736       | 0.642-4.698  | 0.27    |
|                              | SBP                          | 0.990       | 0.968-1.014  | 0.41    |
|                              | DBP                          | 1.003       | 0.964-1.044  | 0.87    |
|                              | LVEF                         | 1.053       | 0.998-1.003  | 0.07    |
|                              | Creatinine                   | 1.001       | 0.998-1.001  | 0.59    |
|                              | Aspirin                      | 1.357       | 0.477-3.865  | 0.56    |
|                              | Statins                      | 2.083       | 0.763-5.684  | 0.15    |
|                              | Inotrops                     | 20.368      | 8.241-50.337 | <0.001* |
|                              | Beta-blockers                | 0.050       | 0.022-0.112  | <0.001* |
| <b>3-month mortality</b>     | Age                          | 1.022       | 0.991-1.055  | 0.17    |
|                              | Age                          | 1.029       | 1.010-1.048  | 0.002*  |
|                              | Gender                       | 0.974       | 0.579-1.638  | 0.92    |
|                              | Non-compliance to medication | 1.267       | 0.753-2.133  | 0.37    |
|                              | SBP                          | 0.993       | 0.980-1.005  | 0.26    |
|                              | DBP                          | 1.005       | 0.984-1.026  | 0.66    |
|                              | LVEF                         | 1.003       | 0.970-1.037  | 0.87    |
|                              | Creatinine                   | 1.001       | 1.000-1.003  | 0.15    |
|                              | Aspirin                      | 1.516       | 0.828-2.777  | 0.17    |
|                              | Statins                      | 1.307       | 0.747-2.284  | 0.34    |
|                              | Inotrops                     | 1.456       | 0.759-2.793  | 0.25    |
| Beta-blockers                | 0.513                        | 0.231-1.143 | 0.10         |         |
| Age                          | 1.029                        | 1.010-1.048 | 0.002*       |         |

SBP= systolic blood pressure, DBP = diastolic blood pressure, LVEF = Left ventricular ejection fraction.

**Table 4:** Effect of non-withdrawal of beta-blockers in acute decompensated de-novo heart failure with beta-blocker therapy on admission and LVEF <40%

|                            | All patients with de-novo heart failure, LVEF <40% and on beta-blockers treatment on admission.<br>N=260 | Patients with de-novo heart failure and beta-blockers (not withdrawn during the acute stage)<br>N=224(86.2%) | Patients with de-novo heart failure (previous beta-blockers intake and stopped during the acute phase)<br>N=36(13.8%) | p- value |
|----------------------------|----------------------------------------------------------------------------------------------------------|--------------------------------------------------------------------------------------------------------------|-----------------------------------------------------------------------------------------------------------------------|----------|
| <b>In-hospital outcome</b> |                                                                                                          |                                                                                                              |                                                                                                                       |          |
| Death                      | 22/260(8.5%)                                                                                             | 5/224(2.2%)                                                                                                  | 17/36(47.2%)                                                                                                          | <0.001*  |
| Length of stay             | 9.7±16.1                                                                                                 | 9.6±16.6                                                                                                     | 10.1±12.1                                                                                                             | 0.86     |
| <b>3 months follow-up</b>  |                                                                                                          |                                                                                                              |                                                                                                                       |          |
| Death                      | 9/232(3.9%)                                                                                              | 7/214(3.3%)                                                                                                  | 2/18(11.1%)                                                                                                           | 0.14     |
| Hospitalization for HF     | 39/223(17.5%)                                                                                            | 38/207(18.4%)                                                                                                | 1/16(6.3%)                                                                                                            | 0.31     |
| Length of stay             | 8.8±9.8                                                                                                  | 8.8±9.9                                                                                                      | 8.0±NE                                                                                                                | NE       |
| <b>At 1 year follow-up</b> |                                                                                                          |                                                                                                              |                                                                                                                       |          |
| Death                      | 15/221(6.8%)                                                                                             | 13/206(6.3%)                                                                                                 | 2/15(13.3%)                                                                                                           | 0.27     |
| Hospitalization for HF     | 61/206(29.6%)                                                                                            | 73/193(37.8%)                                                                                                | 3/13(23.1%)                                                                                                           | 0.38     |
| Length of stay             | 7.9±7.5                                                                                                  | 8.2±7.6                                                                                                      | 2.7±2.1                                                                                                               | 0.21     |

The frequencies and percentages for death, hospitalization for heart failure (HF) and length of stay during hospitalization. Death rates were cumulative. All values are given as n(%) or mean ±SD.

**Table 5:** Multivariate analysis for intra-hospital death in patients with ADNHF, a LVEF <40% and beta-blockers on admission

| Variable       | OR      | 95 % C.I        | P value |
|----------------|---------|-----------------|---------|
| Age            | 1.047   | 0.992-1.105     | 0.097   |
| Gender         | 2.179   | 0.431-10.989    | 0.346   |
| ACE-inhibitors | 1.112   | 0.215-5.757     | 0.899   |
| Inotrops       | 172.272 | 16.002-1854.600 | <0.001* |
| Beta-blockers  | 0.018   | 0.003-0.122     | <0.001* |

SBP= systolic blood pressure, DBP = diastolic blood pressure, LVEF = Left ventricular ejection fraction.

**Supplementary table 1:** Baseline characteristics of patients with ADCHF and a left ventricular ejection fraction <40%, on Beta-Blockers included in the Gulf-Care.

|                                            | Patients with ADCHF with a LVEF <40% and Beta-Blockers on admission<br>N=1018 | Beta-Blockers at discharge.<br>N=926 | No Beta-Blockers at discharge.<br>N=92 | p value |
|--------------------------------------------|-------------------------------------------------------------------------------|--------------------------------------|----------------------------------------|---------|
| Age (years)                                | 61.0±13.9                                                                     | 61.1±13.7                            | 60.3±15.8                              | 0.64    |
| Male gender                                | 751(73.8%)                                                                    | 689(74.4%)                           | 62(67.4%)                              | 0.14    |
| BMI (kg/m <sup>2</sup> )                   | 27.7±5.8                                                                      | 27.6±5.8                             | 28.3±5.7                               | 0.28    |
| Hypertension                               | 673(66.1%)                                                                    | 620(67.0%)                           | 53(57.6%)                              | 0.07    |
| Diabetes Mellitus                          | 569(55.9%)                                                                    | 518(55.9%)                           | 51(55.4%)                              | 0.92    |
| Hyperlipidemia                             | 464(45.6%)                                                                    | 419(45.2%)                           | 45(48.9%)                              | 0.50    |
| Smoking                                    | 162(15.9%)                                                                    | 149(16.1%)                           | 13(14.1%)                              | 0.62    |
| <b>Race</b>                                |                                                                               |                                      |                                        |         |
| Arabs                                      | 937 (92.0%)                                                                   | 852(92.0%)                           | 85(92.4%)                              | 0.37    |
| Asians                                     | 77(7.6%)                                                                      | 71(7.7%)                             | 6(6.5%)                                |         |
| Others                                     | 4(0.4%)                                                                       | 3(0.3%)                              | 1(1.1%)                                |         |
| <b>Past – medical history</b>              |                                                                               |                                      |                                        |         |
| Known CAD                                  | 676(66.4%)                                                                    | 617(66.6%)                           | 59(64.1%)                              | 0.62    |
| Stroke /TIAs                               | 96(9.4%)                                                                      | 89(9.6%)                             | 7(7.6%)                                | 0.53    |
| Valvular heart disease                     | 154(15.1%)                                                                    | 139(15.0%)                           | 15(16.3%)                              | 0.74    |
| Atrial fibrillation                        | 170(16.7%)                                                                    | 157(17.0%)                           | 13(14.1%)                              | 0.48    |
| CKD                                        | 215(21.1%)                                                                    | 192(20.7%)                           | 23(25.0%)                              | 0.33    |
| <b>Etiology</b>                            |                                                                               |                                      |                                        |         |
| Non-Compliance Medication                  | 300(29.5%)                                                                    | 281(30.3%)                           | 19(20.7%)                              | 0.052   |
| IHD                                        | 204(20.0%)                                                                    | 184(19.9%)                           | 20(21.7%)                              | 0.66    |
| HTN                                        | 46(4.5%)                                                                      | 44(4.8%)                             | 2(2.2%)                                | 0.42    |
| Arrhythmia                                 | 61(6.0%)                                                                      | 57(6.2%)                             | 4(4.3%)                                | 0.48    |
| Anemia                                     | 23(2.3%)                                                                      | 20(2.2%)                             | 3(3.3%)                                | 0.45    |
| Renal failure                              | 58(5.7%)                                                                      | 50(5.4%)                             | 8(8.7%)                                | 0.19    |
| <b>Clinical and biochemical parameters</b> |                                                                               |                                      |                                        |         |

|                                     |             |             |             |         |
|-------------------------------------|-------------|-------------|-------------|---------|
| HR, b.p.m                           | 94.4±22.4   | 94.8±22.5   | 91.1±21.2   | 0.14    |
| SBP, mmHg                           | 126.6±30.6  | 127.8±30.3  | 114.2±31.3  | <0.001  |
| DBP, mmHg                           | 76.4±17.9   | 77.2±17.8   | 67.8±17.2   | <0.001  |
| LVEF (%)                            | 26.6±7.1    | 26.7±7.1    | 25.6±7.6    | 0.16    |
| BNP, pg/mL                          | 6847±9679   | 6851±9831   | 6777±7271   | 0.97    |
| Creatinin, mmol/L                   | 137.7±116.3 | 135.7±113.4 | 158.5±141.4 | 0.07    |
| <b>Medications</b>                  |             |             |             |         |
| Carvedilol                          | 649(63.8%)  | 589 (63.6%) | 60(65.2%)   | 0.75    |
| Bisoprolol                          | 286 (28.1%) | 265(28.6%)  | 21(22.8%)   | 0.23    |
| Metoprolol                          | 64 (6.3%)   | 57(6.2%)    | 7(7.6%)     | 0.58    |
| Atenolol                            | 19 (1.9%)   | 15(1.6%)    | 4(4.3%)     | 0.08    |
| ACE-inhibitors                      | 652(64.0%)  | 600(64.8%)  | 52(56.5%)   | 0.11    |
| ARBs                                | 180(17.7%)  | 167 (18.0%) | 13(14.1%)   | 0.34    |
| Statins                             | 751 (73.8%) | 694(74.9%)  | 57(62.0%)   | 0.007   |
| Aspirin                             | 832 (81.7%) | 768(82.9%)  | 64(69.6%)   | 0.002   |
| VKA                                 | 221(21.7%)  | 196 (21.2%) | 25(27.2%)   | 0.18    |
| Ibravadine                          | 48(4.7%)    | 42 (4.5%)   | 6(6.5%)     | 0.43    |
| Aldosterone antagonists             | 419(41.2%)  | 383 (41.4%) | 36 (39.1%)  | 0.67    |
| Clopidogrel                         | 301(29.6%)  | 274 (29.6%) | 27(29.3%)   | 0.96    |
| Diuretics                           | 920(90.4%)  | 835(90.2%)  | 85(92.4%)   | 0.49    |
| Inotrops use during hospitalization | 156 (15.3%) | 110 (11.9%) | 46 (50.0%)  | <0.001* |

All values are given as n (%) or mean ±SD. ADCHF = Acute decompensated chronic heart failure, BMI=body mass index, CAD= coronary artery disease, TIAs=transient ischemic attacks, CKD=chronic kidney disease, HR=heart rate, SBP= systolic blood pressure, DBP= diastolic blood pressure, LVEF = Left ventricular ejection fraction, VKA= Vitamin K antagonists, ARBs= Angiotensin receptor blockers.

**Supplementary table 2:** Baseline characteristics of patients with ADNHF and a left ventricular ejection fraction <40%, on Beta-Blockers, included in the Gulf-Care.

|                                 | Patients with<br>ADCHF with a<br>LVEF <40% and<br>Beta- Blockers<br>on admission<br><br>N=260 | Beta-Blockers<br>at discharge.<br><br>N=224 | No Beta-Blockers<br>at discharge.<br><br>N=36 | p    |
|---------------------------------|-----------------------------------------------------------------------------------------------|---------------------------------------------|-----------------------------------------------|------|
| Age (years)                     | 59.8±13.8                                                                                     | 60.1±13.8                                   | 57.9±13.9                                     | 0.35 |
| Male gender                     | 177(68.1%)                                                                                    | 151(67.4%)                                  | 26(72.2%)                                     | 0.56 |
| BMI (kg/m <sup>2</sup> )        | 28.1±5.7                                                                                      | 28.1±5.8                                    | 28.1±5.2                                      | 0.99 |
| Hypertension                    | 181(69.6%)                                                                                    | 158(70.5%)                                  | 23(63.9%)                                     | 0.42 |
| Diabetes Mellitus               | 147(56.5%)                                                                                    | 123(54.9%)                                  | 24(66.7%)                                     | 0.18 |
| Hyperlipidemia                  | 106(40.8%)                                                                                    | 92(41.1%)                                   | 14(38.9%)                                     | 0.80 |
| Smoking                         | 67 (25.8%)                                                                                    | 60(26.8%)                                   | 7(19.4%)                                      | 0.35 |
| <b>Race</b>                     |                                                                                               |                                             |                                               |      |
| Arabs                           | 232(89.2%)                                                                                    | 201 (89.7%)                                 | 31(86.1%)                                     | 0.56 |
| Asians                          | 28(10.8%)                                                                                     | 23(10.3%)                                   | 5(13.9%)                                      |      |
| Others                          | -                                                                                             | -                                           | -                                             |      |
| <b>Past – medical history</b>   |                                                                                               |                                             |                                               |      |
| Known CAD                       | 150(57.7%)                                                                                    | 130(58.0%)                                  | 20(55.6%)                                     | 0.78 |
| Stroke /TIAs                    | 29(11.2%)                                                                                     | 24(10.7%)                                   | 5(13.9%)                                      | 0.57 |
| Valvular heart disease          | 19(7.3%)                                                                                      | 16(7.1%)                                    | 3 (8.3%)                                      | 0.73 |
| Atrial fibrillation             | 23(8.8 %)                                                                                     | 19(8.5%)                                    | 4(11.1%)                                      | 0.53 |
| CKD                             | 28(10.8%)                                                                                     | 22(9.8%)                                    | 6 (16.7%)                                     | 0.24 |
| <b>Etiology</b>                 |                                                                                               |                                             |                                               |      |
| Non-Compliance Medication       | 40(15.4%)                                                                                     | 37(16.5%)                                   | 3(8.3%)                                       | 0.20 |
| IHD                             | 117(45.0%)                                                                                    | 100(44.6%)                                  | 17(47.2%)                                     | 0.77 |
| HTN                             | 12(4.6%)                                                                                      | 11(4.9%)                                    | 1(2.8%)                                       | 0.99 |
| Arrhythmia                      | 11(4.2%)                                                                                      | 8(3.6%)                                     | 3(8.3%)                                       | 0.18 |
| Anemia                          | 5(1.9%)                                                                                       | 5(2.2%)                                     | 0(0.0%)                                       | 0.99 |
| Renal failure                   | 9(3.5%)                                                                                       | 8(3.6%)                                     | 1(2.8%)                                       | 0.99 |
| <b>Clinical and biochemical</b> |                                                                                               |                                             |                                               |      |

| parameters                          |             |             |             |        |
|-------------------------------------|-------------|-------------|-------------|--------|
| HR, b.p.m                           | 94.6±22.3   | 94.6±21.2   | 94.7±28.7   | 0.99   |
| SBP, mmHg                           | 133.6±32.4  | 134.6±31.9  | 126.8±35.0  | 0.19   |
| DBP, mmHg                           | 80.5±19.3   | 81.0±18.8   | 77.6±22.4   | 0.34   |
| LVEF (%)                            | 28.8±7.2    | 29.0±7.2    | 27.5±7.4    | 0.23   |
| BNP, pg/mL                          | 5227±4924   | 5361±5046   | 3883±1614   | 0.52   |
| Creatinin, mmol/L                   | 128.5±121.9 | 124.9±123.5 | 151.1±110.2 | 0.23   |
| <b>Medications</b>                  |             |             |             |        |
| Carvedilol                          | 100 (38.5%) | 84(37.5%)   | 16(44.4%)   | 0.42   |
| Bisoprolol                          | 90 (34.6%)  | 82(36.6%)   | 8(22.2%)    | 0.09   |
| Metoprolol                          | 35 (13.5%)  | 25 (11.2%)  | 10(27.8%)   | 0.01   |
| Atenolol                            | 35 (13.5%)  | 33 (14.7%)  | 2(5.6%)     | 0.18   |
| ACE-inhibitors                      | 166(63.8%)  | 150(67.0%)  | 16(44.4%)   | 0.009  |
| ARBs                                | 23(8.8%)    | 18(8.0%)    | 5(13.9%)    | 0.33   |
| Statins                             | 180(69.2%)  | 154(68.8%)  | 26(72.2%)   | 0.67   |
| Aspirin                             | 204(78.5%)  | 176(78.6%)  | 28(77.8%)   | 0.91   |
| VKA                                 | 19(7.3%)    | 16(7.1%)    | 3(8.3%)     | 0.73   |
| Ibravadine                          | 7(2.7%)     | 7(3.1%)     | 0(0.0%)     | 0.59   |
| Aldosterone antagonists             | 45(17.3%)   | 38(17.0%)   | 7(19.4%)    | 0.71   |
| Clopidogrel                         | 81(31.2%)   | 69(30.8%)   | 12(33.3%)   | 0.76   |
| Diuretics                           | 113(43.5%)  | 98(43.8%)   | 15(41.7%)   | 0.81   |
| Inotrops use during hospitalization | 51 (19.6%)  | 32 (14.3%)  | 19 (52.8%)  | <0.001 |

All values are given as n (%) or mean ±SD. ADNHF = Acute de-novo heart failure, BMI=body mass index, CAD= coronary artery disease, TIAs=transient ischemic attacks, CKD=chronic kidney disease, HR=heart rate, SBP= systolic blood pressure, DBP= diastolic blood pressure, LVEF = Left ventricular ejection fraction, VKA= Vitamin K antagonists, ARBs= Angiotensin receptor blockers.



**Supplementary table 3:** Variables after propensity score matching on inotropes in patients with ADCHF, a LVEF <40% and on beta-blockers on admission.

|                               | Beta-blockers<br>at discharge<br>N=92 | No Beta-blockers<br>at discharge<br>N=92 | p value |
|-------------------------------|---------------------------------------|------------------------------------------|---------|
| Age (years)                   | 60.3±12.7                             | 60.3±15.8                                | 0.98    |
| Male gender                   | 74 (80.4%)                            | 62(67.4%)                                | 0.044*  |
| Noncompliance with medication | 51 (55.4%)                            | 19 (20.7%)                               | <0.001* |
| SBP, mmHg                     | 147.5±39.8                            | 114.2±31.3                               | <0.001* |
| DBP, mmHg                     | 95.9±23.4                             | 67.8±17.2                                | <0.001* |
| LVEF (%)                      | 28.3±6.7                              | 25.6±7.6                                 | 0.011*  |
| Creatinin, mmol/L             | 126.7±103.4                           | 158.5±141.4                              | 0.08    |
| Statins                       | 79 (85.9%)                            | 57(62.0%)                                | <0.001* |
| Aspirin                       | 92 (100.0%)                           | 64(69.6%)                                | <0.001* |
| Inotropes                     | 46 (50.0%)                            | 46 (50.0%)                               | 1.000   |

All values are given as n (%) or mean ±SD. SBP= systolic blood pressure, DBP= diastolic blood pressure, LVEF = Left ventricular ejection fraction.

**Supplementary table 4:** Variables after propensity score matching on inotropes in patients with ADNHF, a LVEF <40% and on beta-blockers on admission.

|                | Beta Blocker at discharge<br>N=36 | No Beta Blocker at discharge<br>n=36 | p value |
|----------------|-----------------------------------|--------------------------------------|---------|
| Age            | 59.9±12.7                         | 57.9±13.9                            | 0.514   |
| Gender         | 11 (30.6%)                        | 10 (27.8%)                           | 0.795   |
| ACE-inhibitors | 25 (69.4%)                        | 16 (44.4%)                           | 0.032*  |
| Inotropes      | 19 (52.8%)                        | 19 (52.8%)                           | 1.000   |

All values are given as n (%) or mean ±SD. SBP= systolic blood pressure, DBP= diastolic blood pressure, LVEF = Left ventricular ejection fraction.

## STROBE Statement—checklist of items that should be included in reports of observational studies

|                              | Item No | Recommendation                                                                                                                                                                                                                                                                                                                                                                                                                                                                                                                                                                                                                                                                                                                                                                |
|------------------------------|---------|-------------------------------------------------------------------------------------------------------------------------------------------------------------------------------------------------------------------------------------------------------------------------------------------------------------------------------------------------------------------------------------------------------------------------------------------------------------------------------------------------------------------------------------------------------------------------------------------------------------------------------------------------------------------------------------------------------------------------------------------------------------------------------|
| <b>Title and abstract</b>    | 1       | (a) Indicate the study's design with a commonly used term in the title or the abstract- done page 2<br>(b) Provide in the abstract an informative and balanced summary of what was done and what was found- done page 2                                                                                                                                                                                                                                                                                                                                                                                                                                                                                                                                                       |
| <b>Introduction</b>          |         |                                                                                                                                                                                                                                                                                                                                                                                                                                                                                                                                                                                                                                                                                                                                                                               |
| Background/rationale         | 2       | Explain the scientific background and rationale for the investigation being reported- done page 4                                                                                                                                                                                                                                                                                                                                                                                                                                                                                                                                                                                                                                                                             |
| Objectives                   | 3       | State specific objectives, including any prespecified hypotheses- done page 4                                                                                                                                                                                                                                                                                                                                                                                                                                                                                                                                                                                                                                                                                                 |
| <b>Methods</b>               |         |                                                                                                                                                                                                                                                                                                                                                                                                                                                                                                                                                                                                                                                                                                                                                                               |
| Study design                 | 4       | Present key elements of study design early in the paper- done page 5                                                                                                                                                                                                                                                                                                                                                                                                                                                                                                                                                                                                                                                                                                          |
| Setting                      | 5       | Describe the setting, locations, and relevant dates, including periods of recruitment, exposure, follow-up, and data collection- done page 5                                                                                                                                                                                                                                                                                                                                                                                                                                                                                                                                                                                                                                  |
| Participants                 | 6       | (a) <i>Cohort study</i> —Give the eligibility criteria, and the sources and methods of selection of participants. Describe methods of follow-up- done page 5<br><i>Case-control study</i> —Give the eligibility criteria, and the sources and methods of case ascertainment and control selection. Give the rationale for the choice of cases and controls- not applicable<br><i>Cross-sectional study</i> —Give the eligibility criteria, and the sources and methods of selection of participants. not applicable<br>(b) <i>Cohort study</i> —For matched studies, give matching criteria and number of exposed and unexposed, not applicable<br><i>Case-control study</i> —For matched studies, give matching criteria and the number of controls per case- not applicable |
| Variables                    | 7       | Clearly define all outcomes, exposures, predictors, potential confounders, and effect modifiers. Give diagnostic criteria, if applicable- done page 5                                                                                                                                                                                                                                                                                                                                                                                                                                                                                                                                                                                                                         |
| Data sources/<br>measurement | 8*      | For each variable of interest, give sources of data and details of methods of assessment (measurement). Describe comparability of assessment methods if there is more than one group- done page 5                                                                                                                                                                                                                                                                                                                                                                                                                                                                                                                                                                             |
| Bias                         | 9       | Describe any efforts to address potential sources of bias- done page 6                                                                                                                                                                                                                                                                                                                                                                                                                                                                                                                                                                                                                                                                                                        |
| Study size                   | 10      | Explain how the study size was arrived at- done page 5 to 6                                                                                                                                                                                                                                                                                                                                                                                                                                                                                                                                                                                                                                                                                                                   |
| Quantitative variables       | 11      | Explain how quantitative variables were handled in the analyses. If applicable, describe which groupings were chosen and why- done page 6                                                                                                                                                                                                                                                                                                                                                                                                                                                                                                                                                                                                                                     |
| Statistical methods          | 12      | (a) Describe all statistical methods, including those used to control for confounding- done page 6<br>(b) Describe any methods used to examine subgroups and interactions- done page 6<br>(c) Explain how missing data were addressed- done page 6<br>(d) <i>Cohort study</i> —If applicable, explain how loss to follow-up was addressed- done page 7<br><i>Case-control study</i> —If applicable, explain how matching of cases and controls was addressed not applicable<br><i>Cross-sectional study</i> —If applicable, describe analytical methods taking account of sampling strategy not applicable<br>(e) Describe any sensitivity analyses- done page 6                                                                                                              |

**Results**

|                  |     |                                                                                                                                                                                                                                |
|------------------|-----|--------------------------------------------------------------------------------------------------------------------------------------------------------------------------------------------------------------------------------|
| Participants     | 13* | (a) Report numbers of individuals at each stage of study—eg numbers potentially eligible, examined for eligibility, confirmed eligible, included in the study, completing follow-up, and analysed- page 6                      |
|                  |     | (b) Give reasons for non-participation at each stage- page 6-7                                                                                                                                                                 |
|                  |     | (c) Consider use of a flow diagram- not applicable                                                                                                                                                                             |
| Descriptive data | 14* | (a) Give characteristics of study participants (eg demographic, clinical, social) and information on exposures and potential confounders- done page 6-7 and table 1                                                            |
|                  |     | (b) Indicate number of participants with missing data for each variable of interest- done page 6-7                                                                                                                             |
|                  |     | (c) <i>Cohort study</i> —Summarise follow-up time (eg, average and total amount)- done page 7-8                                                                                                                                |
| Outcome data     | 15* | <i>Cohort study</i> —Report numbers of outcome events or summary measures over time- done table 2 and 4                                                                                                                        |
|                  |     | <i>Case-control study</i> —Report numbers in each exposure category, or summary measures of exposure-not applicable.                                                                                                           |
|                  |     | <i>Cross-sectional study</i> —Report numbers of outcome events or summary measures-not applicable                                                                                                                              |
| Main results     | 16  | (a) Give unadjusted estimates and, if applicable, confounder-adjusted estimates and their precision (eg, 95% confidence interval). Make clear which confounders were adjusted for and why they were included- done page 6 to 8 |
|                  |     | (b) Report category boundaries when continuous variables were categorized- done page 6 to 8                                                                                                                                    |
|                  |     | (c) If relevant, consider translating estimates of relative risk into absolute risk for a meaningful time period. Not applicable                                                                                               |
| Other analyses   | 17  | Report other analyses done—eg analyses of subgroups and interactions, and sensitivity analyses- done page 7-8                                                                                                                  |

**Discussion**

|                  |    |                                                                                                                                                                                                     |
|------------------|----|-----------------------------------------------------------------------------------------------------------------------------------------------------------------------------------------------------|
| Key results      | 18 | Summarise key results with reference to study objectives- done page 8                                                                                                                               |
| Limitations      | 19 | Discuss limitations of the study, taking into account sources of potential bias or imprecision. Discuss both direction and magnitude of any potential bias - done page 10.                          |
| Interpretation   | 20 | Give a cautious overall interpretation of results considering objectives, limitations, multiplicity of analyses, results from similar studies, and other relevant evidence- done pages from 8 to 10 |
| Generalisability | 21 | Discuss the generalisability (external validity) of the study results- done page 10                                                                                                                 |

**Other information**

|         |    |                                                                                                                                                                              |
|---------|----|------------------------------------------------------------------------------------------------------------------------------------------------------------------------------|
| Funding | 22 | Give the source of funding and the role of the funders for the present study and, if applicable, for the original study on which the present article is based- done page 13. |
|---------|----|------------------------------------------------------------------------------------------------------------------------------------------------------------------------------|

\*Give information separately for cases and controls in case-control studies and, if applicable, for exposed and unexposed groups in cohort and cross-sectional studies.

**Note:** An Explanation and Elaboration article discusses each checklist item and gives methodological background and published examples of transparent reporting. The STROBE checklist is best used in conjunction with this article (freely available on the Web sites of PLoS Medicine at <http://www.plosmedicine.org/>, Annals of Internal Medicine at <http://www.annals.org/>, and Epidemiology at <http://www.epidem.com/>). Information on the STROBE Initiative is available at [www.strobe-statement.org](http://www.strobe-statement.org).

# BMJ Open

## Non-withdrawal of beta-blockers in acute decompensated chronic and de-novo heart failure in a prospective multicenter study of patients with acute heart failure in the Middle East.

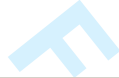

|                                 |                                                                                                                                                                                                                                                                                                                                                                                                                                                                                                                                                                                                                                                                                                                                                                                                                                                                                                                                                                                                                                                 |
|---------------------------------|-------------------------------------------------------------------------------------------------------------------------------------------------------------------------------------------------------------------------------------------------------------------------------------------------------------------------------------------------------------------------------------------------------------------------------------------------------------------------------------------------------------------------------------------------------------------------------------------------------------------------------------------------------------------------------------------------------------------------------------------------------------------------------------------------------------------------------------------------------------------------------------------------------------------------------------------------------------------------------------------------------------------------------------------------|
| Journal:                        | <i>BMJ Open</i>                                                                                                                                                                                                                                                                                                                                                                                                                                                                                                                                                                                                                                                                                                                                                                                                                                                                                                                                                                                                                                 |
| Manuscript ID                   | bmjopen-2016-014915.R1                                                                                                                                                                                                                                                                                                                                                                                                                                                                                                                                                                                                                                                                                                                                                                                                                                                                                                                                                                                                                          |
| Article Type:                   | Research                                                                                                                                                                                                                                                                                                                                                                                                                                                                                                                                                                                                                                                                                                                                                                                                                                                                                                                                                                                                                                        |
| Date Submitted by the Author:   | 08-Feb-2017                                                                                                                                                                                                                                                                                                                                                                                                                                                                                                                                                                                                                                                                                                                                                                                                                                                                                                                                                                                                                                     |
| Complete List of Authors:       | <p>Abi Khalil, Charbel<br/>           Suliman, Kadhim<br/>           Mahfoud, Ziyad<br/>           Singh, Rajvir; Hamad Medical Corporation (HMC), Cardiology and Cardiothoracic Research Centre, Department of Cardiology and Cardiovascular Surgery,<br/>           Asaad, Nidal; Hamad Medical Corporation (HMC), Cardiology and Cardiothoracic Research Centre, Department of Cardiology and Cardiovascular Surgery,<br/>           AlHabib, Khalid ; King Saud University<br/>           Alsheikh-Ali, Alawi<br/>           Al-Jarallah, Mohammed<br/>           Bulbanat, Bassam<br/>           Al Mahmeed, Wael; Heart and Vascular Institute Cleveland Clinic<br/>           Ridha, Mustafa<br/>           Bazargani, Nooshin<br/>           Amin, Haitham; MKCC, Cardiology<br/>           Al-Motarreb, Ahmed; Sana University, Medicine<br/>           AlFaleh, Husam; King Saud University,<br/>           Elasar, Abdelfatah<br/>           Panduranga, Prashanth<br/>           Al Suwaidi, Jassim; Hamad Medical Corporation,</p> |
| <b>Primary Subject Heading</b>: | Cardiovascular medicine                                                                                                                                                                                                                                                                                                                                                                                                                                                                                                                                                                                                                                                                                                                                                                                                                                                                                                                                                                                                                         |
| Secondary Subject Heading:      | Epidemiology                                                                                                                                                                                                                                                                                                                                                                                                                                                                                                                                                                                                                                                                                                                                                                                                                                                                                                                                                                                                                                    |
| Keywords:                       | Heart failure < CARDIOLOGY, Adult cardiology < CARDIOLOGY, Cardiac Epidemiology < CARDIOLOGY                                                                                                                                                                                                                                                                                                                                                                                                                                                                                                                                                                                                                                                                                                                                                                                                                                                                                                                                                    |
|                                 |                                                                                                                                                                                                                                                                                                                                                                                                                                                                                                                                                                                                                                                                                                                                                                                                                                                                                                                                                                                                                                                 |

SCHOLARONE™  
Manuscripts

1  
2  
3 **Non-withdrawal of beta-blockers in acute decompensated chronic and de-**  
4 **novo heart failure in a prospective multicenter study of patients with acute**  
5  
6 **heart failure in the Middle East.**  
7  
8  
9  
10

11  
12 **Charbel Abi Khalil, MD,PhD <sup>1,2,3</sup> \*; Kadhim Sulaiman, MD <sup>4</sup>; Ziyad Mahfoud, PhD <sup>5</sup>; Rajvir**  
13 **Singh, PhD <sup>3</sup>; Nidal Asaad, MBBS <sup>3</sup>; Khalid F AlHabib, MD <sup>6</sup>; Alawi Alsheikh-Ali, MD, MSc <sup>7</sup>;**  
14 **Mohammed Al-Jarallah MBChB <sup>8</sup>; Bassam Bulbanat, MBChB <sup>9</sup>; Wael AlMahmeed, MD <sup>10</sup>;**  
15 **Mustafa Ridha MD <sup>11</sup>; Nooshin Bazargani, MD <sup>12</sup>; Haitham Amin, MD <sup>13</sup>; Ahmed Al-Motarreb,**  
16 **MD <sup>14</sup>; Husam Al Faleh, MD <sup>6</sup>; Abdelfatah Elasar, MD,PhD <sup>15</sup>; Prashanth Panduranga, MBBS,**  
17 **MD <sup>4</sup>; Jassim Al Suwaidi, MBChB <sup>3</sup>, on behalf of the GULF-CARE group.**  
18  
19  
20  
21

22 1- Department of Medicine. Weill Cornell Medicine-Qatar.

23 2- Department of Genetic Medicine. Weill Cornell Medicine-Qatar.

24 3- Adult Cardiology, Heart Hospital, Hamad Medical Corporation, Doha, Qatar.

25 5- Division of Global and Public Health. Weill Cornell Medicine-Qatar

26 5-National Heart Center, Royal Hospital, Muscat, Oman.

27 6- Department of Cardiac Sciences, King Fahad Cardiac Center, King Saud University, Riyadh, Saudi  
28 Arabia.

29 7- College of Medicine, Mohammed Bin Rashid University of Medicine and Health Sciences, Dubai,  
30 UAE.

31 8- Department of Cardiology, Sabah Al-Ahmed Cardiac Center, Kuwait.

32 9- Department of Medicine, Al-Amiri Hospital, Kuwait City, Kuwait.

33 10- Heart and Vascular Institute. Cleveland Clinic-Abu Dhabi, UAE.

34 11- Department of Cardiology, Adan Hospital, Kuwait.

35 12- Department of Cardiology, Dubai hospital, Dubai, United Arab Emirates.

36 13- Department of Cardiology, Mohammed Bin Khalifa Cardiac Center, Manamah, Bahrain.

37 14- Department of Cardiology, Faculty of Medicine, Sana'a University, Sana'a, Yemen.

38 15- Cardiology Department, Tanta University, Egypt.

39  
40  
41  
42  
43  
44  
45  
46  
47  
48  
49  
50  
51  
52  
53  
54  
55  
56 **\* Corresponding author:** Charbel Abi Khalil. MD, PhD, FESC, FACC. Weill Cornell Medicine-Qatar. PO  
57 box 24144. Doha-Qatar. Email: [cha2022@med.cornell.edu](mailto:cha2022@med.cornell.edu)  
58  
59  
60

## Abstract

**Objectives:** Beta-blockers reduce mortality in heart failure (HF). However, it is not clear whether they should be temporarily withdrawn during acute HF.

**Design:** Analysis of prospectively collected data

**Setting:** The GULF-CARE (Gulf aCute heArt failuRe rEgistry) is a prospective multicenter study of patients hospitalized with acute HF in 7 Middle Eastern countries.

**Participants:** 5005 patients with acute HF.

**Outcome measures:** We studied the effect of beta-blockers non-withdrawal on intra-hospital, 3-month and 12-month mortality and hospitalization for HF in patients with acute decompensated chronic heart failure (ADCHF) and acute de-novo heart failure (ADNHF), and a LVEF < 40%.

**Results:** 44.1% of patients were already on beta-blockers on inclusion. Among those, 57.8% had a LVEF <40%. Further, 79.9% were diagnosed with ADCHF and 20.4% with ADNHF. Mean age was 61 (13.9) in the ADCHF group and 59.8 (13.8) in the ADNHF group. Ischemic heart disease was the precipitating factor in 20% of the ADCHF group and 45% in the ADNHF. Intra-hospital mortality was lower in patients whose beta-blocker therapy was not withdrawn in both the ADCHF and ADNHF groups. This protective effect persisted after multivariate analysis (OR 0.05, 95% CI [0.02-0.11]; OR 0.04, 95% CI [0.01-0.16]; respectively,  $p < 0.001$  for both) and propensity score matching (OR 0.08, 95% CI [0.01-0.46]; OR 0.04, 95% CI [0.01-0.16]; respectively,  $p < 0.006$  for both). At 3 months, mortality was still lower only in ADCHF patients in whom beta-blockers were maintained during initial hospitalization. However, the benefit was lost after correcting for confounding factors. Interestingly, hospitalization for HF and length of hospital stay were unaffected by beta-blockers discontinuation in all patients.

**Conclusion:** In summary, non-withdrawal of beta-blockers in acute decompensated chronic heart failure and acute de-novo heart failure is associated with lower intra-hospital mortality.

**Trial registration number:** NCT01467973.

1  
2  
3  
4  
5  
6  
7  
8  
9  
10  
11  
12  
13  
14  
15  
16  
17  
18  
19  
20  
21  
22  
23  
24  
25  
26  
27  
28  
29  
30  
31  
32  
33  
34  
35  
36  
37  
38  
39  
40  
41  
42  
43  
44  
45  
46  
47  
48  
49  
50  
51  
52  
53  
54  
55  
56  
57  
58  
59  
60

**Keywords**

Heart failure

Beta-blockers

Acute decompensated chronic heart failure

Acute de-novo heart failure

For peer review only



## Strengths and limitations of this study

This is the first study to assess non-withdrawal of beta-blockers in de-novo heart failure.

Like any observational study, selection bias could exist. Moreover, the decision of beta-blocker withdrawal during acute heart failure could have been due to different factors that we did not account for in our analysis.

Furthermore, no information was available regarding the dose of beta-blockers, in particular whether the dose was reduced in patients who continued to use beta-blockers during acute decompensation.

## Introduction

Since the publication of the MERIT-HF, CIBIS-II, US Carvedilol Heart failure and COPENICUS trials<sup>1-4</sup>, in which beta-blockers improved survival in heart failure (HF) patients, international guidelines recommended using this drug class as first-line treatment in chronic HF along with the renin-angiotensin system blockers<sup>5</sup>. Initial safety concerns regarding the use of beta-blockers in patients with HF were dropped with the emergence of several studies that demonstrated up to 30% decrease in mortality risk in those patients<sup>6</sup>. Despite the improvement in the treatment and prognosis of chronic HF, acute HF remains a challenging condition, treatment of which is essentially symptomatic. In the EuroHeart Failure Survey II, in-hospital mortality of patients with acute HF was about 7%<sup>7</sup>, and one-year mortality above 20%<sup>8</sup>. The continuation of beta-blockers during acute HF remains controversial and subject to clinical judgment. The Beta-blocker CONTinuation Vs. INTerruption in patients with Congestive heart failure hospitalized for a decompensation episode (B-CONVINCED) trial, a randomized, controlled, open-labeled study that compared continuation *versus* withdrawal of beta-blockers during acute HF did not report any short-term or long-term benefit in patients assigned to continue their treatment<sup>9</sup>. In a post-hoc analysis of the Survival of Patients With Acute Heart Failure in Need of Intravenous Inotropic Support (SURVIVE) study that had a similar design to B-CONVINCED, 1-month and 3-month mortality decreased in patients whose beta-blockers were not withdrawn during initial hospitalization<sup>10</sup>. However, the protective effect was lost after correcting for classical heart failure covariates.

Currently, there is no large-scale data from the Middle East (ME) with regard to beta-blockers use in HF. The aim of this paper is to report on use of beta-blockers in patients admitted with acute HF and to assess short-term and long-term consequences of withdrawal or continuation of beta-blockers in HF patients with left ventricular dysfunction in the ME.

## Methods

The Gulf CARE (Gulf aCute heArt failuRe registry) is a multinational multicenter prospective observational acute heart failure survey based on cases admitted to various hospitals in 7 countries from the Gulf Middle East, namely Oman, Saudi Arabia, United Arab Emirates (UAE), Qatar, Bahrain, Yemen, and Kuwait. Details of the recruitment of patients, the study design and methods have been published previously<sup>11 12</sup>. In brief, we collected data, as per the case report form, of patients with acute HF from both genders who were above 18 years of age admitted to the participating hospitals. Recruitment started in February 2012 and ended on November 13, 2012. This was preceded by a pilot phase of 1 month in November 2011. The registry continued to follow-up patients at 3 months and 1 year. The registry protocol was approved by each participating center's research ethics committee or institutional review board (IRB): Directorate of research and studies, Ministry of Health - Sultanate of Oman; King Saud University's IRB, Kingdom of Saudi Arabia; Sheikh Khalifa medical city's IRB, UAE; Hamad Medical Corporation's IRB, Qatar; Mohammed Bin Khalifa cardiac center's IRB, Bahrain; Sana'a University' IRB, Yemen and Ministry of health's IRB in Kuwait) .The study was registered at clinicaltrials.gov with number NCT01467973. A written informed consent was obtained from all patients

Acute HF was further classified as either acute decompensated chronic heart failure (ADCHF) or acute de-novo heart failure (ADNHF). ADCHF was defined as worsening of HF in patients with a previous diagnosis or hospitalization for HF. ADNHF was defined as acute HF in patients with no prior history of heart failure. All patients were followed-up at 3 months by telephone, and at 1 year either by telephone or by a clinic visit. The registry data was collected on-line using a dedicated Web-site including demographics, risk factors, medical history, clinical manifestations, investigations, medications with dose and management. The participating hospitals ranged from secondary care hospitals to tertiary care hospitals with interventional facilities including device therapy.

1  
2  
3 The inclusion criteria for this analysis was those patients who were on beta-blockers at time of  
4 admission and had a left ventricular ejection fraction (LVEF) < 40%. Those patients with preserved left  
5 ventricular function and not on beta-blockers at time of admission were excluded from further analysis.  
6  
7 Furthermore, 2 cohorts were created, the first with ADCHF and the second with ADNHF. The main  
8 outcome measures were mortality, hospitalization for HF, and length of hospital stay.  
9

10  
11 Baseline categorical variables and outcome measures were summarized using frequency distributions  
12 while means and standard deviations were used for numeric variables. Outcome measures and  
13 baseline patients' characteristics were compared between the two groups: withdrawal and non-  
14 withdrawal of beta-blockers using the Chi-squared test (or Fisher's exact test when expected cell  
15 counts fell below 5) for categorical variables and the student's t test or Wilcoxon rank sum test for  
16 numeric variables. Multivariate logistic regression analysis performed for in-hospital and 3-months  
17 included variables that were significantly different between the two groups in addition to age and  
18 gender. Adjusted Odds Ratios (OR) and 95% Confidence intervals with p values are presented. All  
19 analyses were done separately for the ADCHF and ADNHF patients. In addition, several sensitivity  
20 analyses were performed. Propensity scores were computed using logistic regression with membership  
21 in the two groups as the outcome and baseline variables that were significantly different between the  
22 groups as the independent variables. These scores were used to adjust the association between the  
23 mortality outcomes and the main variable (membership in each group) using multivariate logistic  
24 regression. Moreover, propensity score matching using the most influential variable (inotropes) was  
25 used and the main comparison between the two groups was assessed with and without adjustment to  
26 variables that were still significantly different between the two groups even after matching. This latter  
27 analysis was not done for the ADNHF groups as the sample sizes became small after matching.  
28  
29 Statistical significance was set at the 5% level. All analyses were done using IBM-SPSS version 23.0.  
30  
31  
32  
33  
34  
35  
36  
37  
38  
39  
40  
41  
42  
43  
44  
45  
46  
47  
48  
49  
50  
51  
52  
53  
54  
55  
56  
57  
58  
59  
60

## Results:

Out of the total 5005 participants in the GULF-CARE, 2208 (44.1%) patients were already on beta-blockers on inclusion. Further, beta-blockers were prescribed in 1278 (42.2%) patients with a LVEF <40%. Among those, 1018 (79.9%) were diagnosed with acute decompensated chronic HF (ADCHF) and 260 (20.4%) with acute do-novo heart failure (ADNHF). As shown in table 1, Patients with ADCHF tended to have more comorbidities than patients with ADNHF. They had a higher prevalence of coronary artery disease (CAD), chronic kidney disease (CKD), valvular heart disease, atrial fibrillation (AF) and a lower LVEF; which could explain the more common use of angiotensin receptor antagonists (ARBs), aldosterone antagonists, vitamin K antagonists (VKA) and diuretics in these patients. Interestingly, they smoked less, a phenomenon that could be due to the effect of earlier life-style changes and anti-smoking campaigns in patients with CHF.

**Table 1:** Baseline characteristics of patients on beta-blockers on admission and a left ventricular ejection fraction <40% included in the Gulf-Care.

|                          | All patients in Gulf Care<br>N=5005 | Patients with a LVEF <40% on beta-blockers on admission<br>N=1278             |                                                                             | P value * |
|--------------------------|-------------------------------------|-------------------------------------------------------------------------------|-----------------------------------------------------------------------------|-----------|
|                          |                                     | Patients with ADCHF and a LVEF <40%, on beta-blockers on admission.<br>N=1018 | Patients with ADNHF and a LVEF<40%, on beta-blockers on admission.<br>N=260 |           |
| Age (years)              | 59±15                               | 61.0±13.9                                                                     | 59.8±13.8                                                                   | 0.21      |
| Male gender              | 3131(62.6%)                         | 751(73.8%)                                                                    | 177(68.1%)                                                                  | 0.07      |
| BMI (kg/m <sup>2</sup> ) | 28±6                                | 27.7±5.8                                                                      | 28.1±5.7                                                                    | 0.26      |
| Hypertension             | 3059(61.1%)                         | 673(66.1%)                                                                    | 181(69.6%)                                                                  | 0.29      |
| Diabetes Mellitus        | 2492(49.8%)                         | 569(55.9%)                                                                    | 147(56.5%)                                                                  | 0.86      |

|                                            |             |             |             |       |
|--------------------------------------------|-------------|-------------|-------------|-------|
| Hyperlipidemia                             | 1799(35.9%) | 464(45.6%)  | 106(40.8%)  | 0.16  |
| Smoking                                    | 1103(22%)   | 162(15.9%)  | 67 (25.8%)  | 0.001 |
| <b>Race</b>                                |             |             |             |       |
| Arabs                                      | 4516(90.2%) | 937 (92.0%) | 232(89.2%)  | 0.04  |
| Asians                                     | 473(9.5%)   | 77(7.6%)    | 28(10.8%)   |       |
| Others                                     | 16(0.3%)    | 4(0.4%)     | -           |       |
| <b>Past – medical history</b>              |             |             |             |       |
| Known CAD                                  | 2337(46.7%) | 676(66.4%)  | 150(57.7%)  | 0.008 |
| Stroke /TIAs                               | 404(8%)     | 96(9.4%)    | 29(11.2%)   | 0.40  |
| Valvular heart disease                     | 675(13.5%)  | 154(15.1%)  | 19(7.3%)    | 0.001 |
| Atrial fibrillation                        | 607(12%)    | 170(16.7%)  | 23(8.8 %)   | 0.001 |
| CKD                                        | 744(14.9%)  | 215(21.1%)  | 28(10.8%)   | 0.001 |
| <b>Etiology</b>                            |             |             |             |       |
| Non-Compliance Medication                  | 964(19%)    | 300(29.5%)  | 40(15.4%)   | 0.05  |
| IHD                                        | 1365(27%)   | 204(20,0%)  | 117(45.0%)  | 0.67  |
| HTN                                        | 410(8.2%)   | 46(4.5%)    | 12(4.6%)    | 0.26  |
| Arrhythmia                                 | 301(6%)     | 61(6.0%)    | 11(4.2%)    | 0.49  |
| Anemia                                     | 143(3.1%)   | 23(2.3%)    | 5(1.9%)     | 0.50  |
| Renal failure                              | 221(4.4%)   | 58(5.7%)    | 9(3.5%)     | 0.19  |
| <b>Clinical and biochemical parameters</b> |             |             |             |       |
| HR, b.p.m                                  | 77.6±12.8   | 94.4±22.4   | 94.6±22.3   | 0.92  |
| SBP, mmHg                                  | 118±18      | 126.6±30.6  | 133.6±32.4  | 0.002 |
| DBP, mmHg                                  | 70±12       | 76.4±17.9   | 80.5±19.3   | 0.001 |
| LVEF (%)                                   | 36.9±14     | 26.6±7.1    | 28.8±7.2    | 0.001 |
| BNP, pg/mL                                 | 5324±4523   | 6847±9679   | 5227±4924   | 0.21  |
| Creatinine, mmol/L                         | 130±116     | 137.7±116.3 | 128.5±121.9 | 0.24  |
| <b>Medications</b>                         |             |             |             |       |

|                                      |             |             |             |       |
|--------------------------------------|-------------|-------------|-------------|-------|
| Carvedilol                           | 1099(21.9%) | 649(63.8%)  | 100 (38.5%) | 0.001 |
| Bisoprolol                           | 626 (12.5%) | 286 (28.1%) | 90 (34.6%)  | 0.04  |
| Metoprolol                           | 299 (5.9%)  | 64 (6.3%)   | 35 (13.5%)  | 0.001 |
| Atenolol                             | 184 (3.6%)  | 19 (1.9%)   | 35 (13.5%)  | 0.001 |
| ACE-inhibitors                       | 2762(55.2%) | 652(64.0%)  | 166(63.8%)  | 0.96  |
| ARBs                                 | 645(12.9%)  | 180(17.7%)  | 23(8.8%)    | 0.001 |
| Statins                              | 2555(51%)   | 751 (73.8%) | 180(69.2%)  | 0.14  |
| Aspirin                              | 3089(61.7%) | 832 (81.7%) | 204(78.5%)  | 0.23  |
| VKA                                  | 618(12%)    | 221(21.7%)  | 19(7.3%)    | 0.001 |
| Ibravadine                           | 115(2.3%)   | 48(4.7%)    | 7(2.7%)     | 0.15  |
| Aldosterone antagonists              | 840(16.8%)  | 419(41.2%)  | 45(17.3%)   | 0.001 |
| Clopidogrel                          | 966(19%)    | 301(29.6%)  | 81(31.2%)   | 0.61  |
| Diuretics                            | 2882(57.6%) | 920(90.4%)  | 113(43.5%)  | 0.001 |
| Inotropes use during hospitalization | 783 (16%)   | 156 (15.3%) | 51 (19.6%)  | 0.96  |

All values are given as n (%) or mean  $\pm$ SD. \* p value: patients with acute decompensated chronic heart failure and LVEF <40% on beta-blockers on admission vs. de - Novo heart failure and LVEF <40% on beta-blockers on admission. ADCHF = Acute decompensated chronic heart failure, ADNHF = Acute de-novo heart failure, BMI=body mass index, CAD= coronary artery disease, TIAs=transient ischemic attacks, CKD=chronic kidney disease, HR=heart rate, SBP= systolic blood pressure, DBP= diastolic blood pressure, LVEF = Left ventricular ejection fraction, VKA= Vitamin K antagonists, ARBs= Angiotensin receptor blockers.

Beta-blockers were withdrawn in 10% of the patients in the ADCHF group and 13.8% in the ADNHF group. Those ADCHF patients in whom beta-blockers were discontinued had a lower blood pressure at inclusion and half of them required inotropic support during hospitalization (**supplementary table 1**). ADNHF patients who continued beta-blockade therapy were more commonly prescribed ACE-inhibitors and required less inotropic support (**supplementary table 2**).

In the ADCHF group, 15 (1.6%) in-hospital deaths occurred in patients whose beta-blocker therapy was not withdrawn as compared to 37 (40.2%) when beta-blockers were discontinued ( $p < 0.001$ ) (**Table 2**).

**Table 2:** Effect of non-withdrawal of beta-blockers in acute decompensated chronic heart failure with beta-blocker therapy on admission and a LVEF  $< 40\%$

|                            | All patients with acute decompensated heart failure, LVEF $< 40\%$ and on beta-treatment on admission<br>N=1018 | Beta-blockers maintained during hospitalization<br>N=926(91%) | Beta-blockers withdrawn during hospitalization<br>N=92(9.0%) | P value     |
|----------------------------|-----------------------------------------------------------------------------------------------------------------|---------------------------------------------------------------|--------------------------------------------------------------|-------------|
| <b>In-hospital outcome</b> |                                                                                                                 |                                                               |                                                              |             |
| Death                      | 52/1018(5.1%)                                                                                                   | 15/926(1.6%)                                                  | 37/92(40.2%)                                                 | $< 0.001^*$ |
| Length of stay             | 9.9 $\pm$ 15.0                                                                                                  | 9.7 $\pm$ 15.1                                                | 12.3 $\pm$ 13.6                                              | 0.1         |
| <b>3-month follow-up</b>   |                                                                                                                 |                                                               |                                                              |             |
| Death                      | 86/946(9.1%)                                                                                                    | 77/896(8.6%)                                                  | 9/50(18.0%)                                                  | 0.038       |
| Hospitalization for HF     | 219/859(25.5%)                                                                                                  | 204/818(24.9%)                                                | 15/41(36.6%)                                                 | 0.09        |
| Length of stay (days)      | 8.1 $\pm$ 7.6                                                                                                   | 8.1 $\pm$ 7.8                                                 | 7.7 $\pm$ 4.3                                                | 0.86        |
| <b>12-month follow-up</b>  |                                                                                                                 |                                                               |                                                              |             |
| Death                      | 139/880(15.8%)                                                                                                  | 128/835(15.3%)                                                | 11/45(24.4%)                                                 | 0.10        |
| Hospitalization for HF     | 333/741 (44.9%)                                                                                                 | 316/707 (44.7%)                                               | 17/34 (50.0%)                                                | 0.54        |
| Length of stay (days)      | 9.6 $\pm$ 12.0                                                                                                  | 9.6 $\pm$ 12.1                                                | 10.9 $\pm$ 11.1                                              | 0.73        |

The frequencies and percentages for death, hospitalization for heart failure (HF) and length of stay during hospitalization. Death rates were cumulative. All values are given as n (%) or mean  $\pm$ SD.



Multivariate analysis showed that age, gender, non-compliance to medication, SBP, DBP, creatinine and statins were not predictors of in-hospital mortality in case of non-withdrawal of beta-blockers. As expected, inotropic use was significantly associated with higher mortality in our model (**Table 3**).

**Table 3:** Multivariate analysis for intra-hospital and 3-month mortality in patients with ACDHF, a LVEF <40% and beta-blockers on admission.

|                       | Variable                          | OR                                        | 95% .C.I     | P value |  |
|-----------------------|-----------------------------------|-------------------------------------------|--------------|---------|--|
| In-hospital mortality | Age                               | 1.022                                     | 0.991-1.055  | 0.17    |  |
|                       | Gender                            | 1.058                                     | 0.428-2.618  | 0.90    |  |
|                       | Non-compliance to medication      | 1.736                                     | 0.642-4.698  | 0.27    |  |
|                       | SBP                               | 0.990                                     | 0.968-1.014  | 0.41    |  |
|                       | DBP                               | 1.003                                     | 0.964-1.044  | 0.87    |  |
|                       | LVEF                              | 1.053                                     | 0.998-1.003  | 0.07    |  |
|                       | Creatinine                        | 1.001                                     | 0.998-1.001  | 0.59    |  |
|                       | Aspirin                           | 1.357                                     | 0.477-3.865  | 0.56    |  |
|                       | Statins                           | 2.083                                     | 0.763-5.684  | 0.15    |  |
|                       | Inotropes                         | 20.368                                    | 8.241-50.337 | <0.001* |  |
|                       | <b>Beta-blockers on discharge</b> |                                           |              |         |  |
|                       |                                   | Beta-blockers withdrawn (reference group) | 1            | -       |  |
|                       | Beta-blockers maintained          | 0.050                                     | 0.022-0.112  | <0.001* |  |

|                          |                                           |             |             |        |
|--------------------------|-------------------------------------------|-------------|-------------|--------|
| 3-month mortality        | Age                                       | 1.029       | 1.010-1.048 | 0.002* |
|                          | Gender                                    | 0.974       | 0.579-1.638 | 0.92   |
|                          | Non-compliance to medication              | 1.267       | 0.753-2.133 | 0.37   |
|                          | SBP                                       | 0.993       | 0.980-1.005 | 0.26   |
|                          | DBP                                       | 1.005       | 0.984-1.026 | 0.66   |
|                          | LVEF                                      | 1.003       | 0.970-1.037 | 0.87   |
|                          | Creatinine                                | 1.001       | 1.000-1.003 | 0.15   |
|                          | Aspirin                                   | 1.516       | 0.828-2.777 | 0.17   |
|                          | Statins                                   | 1.307       | 0.747-2.284 | 0.34   |
|                          | Inotropes                                 | 1.456       | 0.759-2.793 | 0.25   |
|                          | <b>Beta-blockers on discharge</b>         |             |             |        |
|                          | Beta-blockers withdrawn (reference group) | 1           |             |        |
| Beta-blockers maintained | 0.513                                     | 0.231-1.143 | 0.10        |        |

SBP= systolic blood pressure, DBP = diastolic blood pressure, LVEF = Left ventricular ejection fraction.

Nevertheless, non-withdrawal of beta-blockers was associated with less mortality risk even after correcting for all the parameters (OR=0.05, 95% CI: 0.022-0.112,  $p<0.001$ ). To confirm our findings, we performed a propensity score matching on inotropic use (**supplementary Table 3**). Non-withdrawal of beta-blockers was associated with less mortality in the propensity model (OR=0.05, 95% CI: 0.015-0.170,  $p<0.001$ ), even after correcting for variables that remained significantly different in the new model (OR=0.084, 95% CI: 0.015-0.468,  $p=0.005$ ). At 3 months, fewer deaths also occurred in the group of patients whose beta-blockers therapy was not withdrawn ( $p=0.038$ ). However, after multivariate logistic regression analysis, the protection conferred by beta-blockade continuation was lost (OR=0.513, 95% CI: 0.231-1.143,  $p=0.10$ ).

In the ADNHF group, 5 (2.2%) in-hospital deaths occurred in patients whose beta-blocker therapy was not withdrawn as compared to 17 (47.2%) when beta-blockers were discontinued ( $p < 0.001$ ). However, mortality rates were comparable at 3 months and one year (**Table 4**).

**Table 4:** Effect of non-withdrawal of beta-blockers in acute decompensated de-novo heart failure with beta-blocker therapy on admission and LVEF  $< 40\%$

|                            | All patients with de-novo heart failure, LVEF $< 40\%$ and on beta-blockers treatment on admission.<br>N=260 | Beta-blockers maintained during hospitalization<br>N=224(86.2%) | Beta-blockers withdrawn during hospitalization<br>N=36(13.8%) | p- value    |
|----------------------------|--------------------------------------------------------------------------------------------------------------|-----------------------------------------------------------------|---------------------------------------------------------------|-------------|
| <b>In-hospital outcome</b> |                                                                                                              |                                                                 |                                                               |             |
| Death                      | 22/260(8.5%)                                                                                                 | 5/224(2.2%)                                                     | 17/36(47.2%)                                                  | $< 0.001^*$ |
| Length of stay             | 9.7 $\pm$ 16.1                                                                                               | 9.6 $\pm$ 16.6                                                  | 10.1 $\pm$ 12.1                                               | 0.86        |
| <b>3 months follow-up</b>  |                                                                                                              |                                                                 |                                                               |             |
| Death                      | 9/232(3.9%)                                                                                                  | 7/214(3.3%)                                                     | 2/18(11.1%)                                                   | 0.14        |
| Hospitalization for HF     | 39/223(17.5%)                                                                                                | 38/207(18.4%)                                                   | 1/16(6.3%)                                                    | 0.31        |
| Length of stay             | 8.8 $\pm$ 9.8                                                                                                | 8.8 $\pm$ 9.9                                                   | 8.0 $\pm$ NE                                                  | NE          |
| <b>At 1 year follow-up</b> |                                                                                                              |                                                                 |                                                               |             |
| Death                      | 15/221(6.8%)                                                                                                 | 13/206(6.3%)                                                    | 2/15(13.3%)                                                   | 0.27        |
| Hospitalization for HF     | 61/206(29.6%)                                                                                                | 73/193(37.8%)                                                   | 3/13(23.1%)                                                   | 0.38        |
| Length of stay             | 7.9 $\pm$ 7.5                                                                                                | 8.2 $\pm$ 7.6                                                   | 2.7 $\pm$ 2.1                                                 | 0.21        |

The frequencies and percentages for death, hospitalization for heart failure (HF) and length of stay during hospitalization. Death rates were cumulative. All values are given as n(%) or mean  $\pm$ SD.

Multivariate analysis did not show that age, gender or Ace-inhibitors, which were different among both groups, predicted mortality (**Table 5**).

**Table 5:** Multivariate analysis for intra-hospital death in patients with ADNHF, a LVEF <40% and beta-blockers on admission

| Variable                                  | OR      | 95 % C.I        | P value |
|-------------------------------------------|---------|-----------------|---------|
| Age                                       | 1.047   | 0.992-1.105     | 0.097   |
| Gender                                    | 2.179   | 0.431-10.989    | 0.346   |
| ACE-inhibitors                            | 1.112   | 0.215-5.757     | 0.899   |
| Inotrops                                  | 172.272 | 16.002-1854.600 | <0.001* |
| <b>Beta-blockers</b>                      |         |                 |         |
| Beta-blockers withdrawn (reference group) | 1       |                 |         |
| Beta-blockers maintained                  | 0.018   | 0.003-0.122     | <0.001* |

SBP= systolic blood pressure, DBP = diastolic blood pressure, LVEF = Left ventricular ejection fraction.

Similarly, to the ADCHF, inotropic use was highly associated with mortality. We also performed a propensity score matching on inotropic use (**supplementary Table 4**) and confirmed that beta-blocker continuation in ADNHF has a favorable outcome (OR=0.05, 95% CI: 0.015-0.170, p<0.001), even after correcting for variables that remained significantly different between both groups in the new model (OR=0.047, 95% CI: 0.013-0.169, p<0.001). Similarly to patients with ADCHF, hospitalization for HF and length of stay were unaffected by the withdrawal of beta-blockers.

## Discussion

This observational study demonstrates that pursuing beta-blocker therapy during acute HF confers to patients with chronic and de-novo HF cardiovascular protection and decreases mortality. Interestingly, randomized placebo-controlled trials that assessed pursuing beta-blockers versus withdrawal during acute HF are missing; available data are extrapolated from post-hoc analysis. The B-convinced was designed as a non-inferiority trial and demonstrated only safety of beta-blockers during acute decompensation<sup>9</sup>. In a retrospective analysis of the SURVIVE study that initially assessed 2 inotropic treatments in critical patients with acute HF, the benefit associated with non-withdrawal of beta-blockers was lost after correcting for HF covariates; only patients who never received beta-blockers had a worse outcome as compared to patients who were on these drugs at inclusion and on discharge<sup>10</sup>. In a sub-analysis of the Evaluation Study of Congestive Heart Failure and Pulmonary Artery Catheterization (ESCAPE) that assessed pulmonary artery catheter use among patients admitted with acute HF, patients already prescribed beta-blockers on admission had a lower 6-month mortality risk and a shorter hospitalization stay<sup>13</sup>. Outcomes of the Prospective Trial of Intravenous Milrinone for Exacerbations of Chronic Heart Failure (OPTIME-CHF), designed as a randomized placebo-controlled trial, failed to test the superiority of milrinone to placebo in patients with ADCHF<sup>14</sup>. Further observational analysis showed that withdrawal of beta-blockers was associated with a greater risk of 2-month mortality and re-hospitalization for HF despite limitations due to the use of milrinone in those patients and the small number of patients analyzed<sup>15</sup>.

Our results are comparable to previous observational studies from North America and Europe. In the Italian Survey on Acute Heart Failure, withdrawal of beta-blockers during acute HF was associated with almost 4-fold increase in the risk of intra-hospital mortality<sup>16</sup>. The Organized Program to Initiate Lifesaving Treatment in Hospitalized Patients with Heart Failure (OPTIMIZE-HF) is one of the largest Northern American registries of patients admitted with acute HF. Maintenance of beta-blockers during

1  
2  
3 acute decompensation was associated with better outcome in post-discharge mortality<sup>17</sup>. Consistent  
4  
5 with our findings, Prins et al reported in a recent meta-analysis that included over 2700 patients treated  
6  
7 with beta-blockers and hospitalized for acute HF, that withdrawal of beta-blockers significantly  
8  
9 increased in-hospital and short term mortality, and re-hospitalization for HF<sup>18</sup>.

10  
11  
12 Despite firm safety data and un-doubted long-term benefit, beta-blocker therapy remains under-  
13  
14 prescribed. In our study, only 44.1% of all patients presenting with acute HF and 44.2 % of patients with  
15  
16 a LVEF<40% were treated with beta-blockers. The frequency of beta-blockers prescription is variable  
17  
18 according to cohorts and ranges from 32% in the "Italian Survey on Acute Heart Failure" study<sup>16</sup> to  
19  
20 53.3% in the SURVIVE study<sup>10</sup> and 62% in the ESCAPE trial<sup>13</sup>.

21  
22  
23 It is not known why withdrawal of beta-blockers in acute HF is associated with a worse prognosis.  
24  
25 Activation of the sympathetic system, increase of catecholamine levels and alterations in cardiac  $\beta$ -  
26  
27 receptors are the hallmark of chronic HF; therefore beta-blocker therapy in chronic HF could limit the  
28  
29 deleterious effect of chronic  $\beta$ -receptor stimulation such as arrhythmias, hypertrophy and  
30  
31 cardiomyocytes apoptosis<sup>19</sup>. It may be possible that withdrawal of beta-blockers in the acute phase  
32  
33 takes away earlier protective effect of beta-adrenergic inhibition at a time when the neuro-hormonal  
34  
35 system is activated and catecholamines are significantly increased<sup>20</sup>.

36  
37  
38  
39  
40 Managing beta-blockers during acute HF is still unclear to most physicians. The Process for  
41  
42 Assessment of Carvedilol Therapy in Heart Failure (IMPACT-HF) trial investigators were the first to  
43  
44 report that in-hospital initiation of beta-blockers was safe compared to post-discharge<sup>21</sup>. The latest  
45  
46 guidelines from both the Society of Cardiology (ESC)<sup>22</sup> and the American college of Cardiology  
47  
48 foundation (ACCF)/American heart association (AHA)<sup>23</sup> recommend initiating a beta-blocker therapy  
49  
50 following acute HF as soon as the patient is stable and before discharge. However, uncertainty persists  
51  
52 in regards to continuing beta-blockers during an acute decompensation. Beta-blockade therapy  
53  
54 discontinuation during AHF is variable. In older studies such as the OPTIME-CHF, beta-blockers were  
55  
56  
57  
58  
59  
60

1  
2  
3 withdrawn in over 20% of patients <sup>15</sup>. In our study, beta-blockers were withdrawn in 10% of patients with  
4  
5 ADCHF and 13.8% of patients with ADNHF. Those numbers are almost similar to the Italian Survey on  
6  
7 Acute Heart Failure in which Orso et al reported a withdrawal rate of 9% in all AHF patients with beta-  
8  
9 blockers on admission <sup>16</sup> However, Bohm et al reported a lower rate ( 6.8%) in the retrospective  
10  
11 analysis of the SURVIVE study<sup>10</sup>.  
12  
13

14  
15 It is not known why mortality risk reduction extends up to 3 months in ADCHF but not in ADNHF  
16  
17 although the first group has higher cardiovascular comorbidities and more severe risk factors. One  
18  
19 explanation could be the higher prescription of cardioprotective drugs such as ACE inhibitors, ARBs,  
20  
21 diuretics; all having shown to reduce mortality in patients with chronic HF and improve the outcome <sup>24-</sup>  
22  
23 <sup>26</sup>. One other explanation would also be the frequent use of beta-blockers approved for HF in patients  
24  
25 with ADCHF whereas the prescription of non-HF selective beta-blockers such as atenolol was more  
26  
27 common in ADNHF. Finally, we cannot rule out that the relatively small number of patients with  
28  
29 ADNHF, coupled to an even smaller death rate at 3 months, does not enable us draw any meaningful  
30  
31 conclusions on long-term mortality in those patients.  
32  
33  
34

35  
36 Our study has a few limitations. Like any observational study, selection bias could exist. The decision of  
37  
38 beta-blocker withdrawal during acute HF could have been to different factors not accounted for in our  
39  
40 analysis. Beta-blocker therapy could have been withdrawn in the more severe patients with a poor  
41  
42 prognosis. Despite the correction on available cofounding factors, we could have missed other markers  
43  
44 of disease severity that were not recorded in the cohort. In addition, we could not determine whether  
45  
46 the dosage of beta-blockers on admission, or any reduction during hospitalization, might have  
47  
48 influenced the outcome. Finally, the duration of beta-blocker treatment prior to acute HF was not  
49  
50 recorded; this variable could also be a confounding factor since long-term beta-blocker treatment could  
51  
52 have been more beneficial than short-term.  
53  
54  
55  
56  
57  
58  
59  
60

## Conclusion

Our study suggests non-withdrawal of beta-blocker therapy during acute heart failure reduces short-term mortality risk in patients with acute decompensated chronic and de-novo heart failure; findings that could only be validated in randomized controlled trials designed to show the superiority of non-withdrawal of beta-blockade therapy and also determine whether beta-blocker dose should be reduced or kept unchanged compared to a withdrawal strategy.

For peer review only



## References:

1. Effect of metoprolol CR/XL in chronic heart failure: Metoprolol CR/XL Randomised Intervention Trial in Congestive Heart Failure (MERIT-HF). *Lancet* 1999;353(9169):2001-7.
2. The Cardiac Insufficiency Bisoprolol Study II (CIBIS-II): a randomised trial. *The Lancet* 1999;353(9146):9-13. doi: 10.1016/s0140-6736(98)11181-9
3. Krum H, Roecker EB, Mohacsi P, et al. Effects of initiating carvedilol in patients with severe chronic heart failure: results from the COPERNICUS Study. *JAMA* 2003;289(6):712-8.
4. Packer M, Bristow MR, Cohn JN, et al. The effect of carvedilol on morbidity and mortality in patients with chronic heart failure. U.S. Carvedilol Heart Failure Study Group. *N Engl J Med* 1996;334(21):1349-55. doi: 10.1056/NEJM199605233342101
5. Yancy CW, Jessup M, Bozkurt B, et al. 2013 ACCF/AHA guideline for the management of heart failure: executive summary: a report of the American College of Cardiology Foundation/American Heart Association Task Force on practice guidelines. *Circulation* 2013;128(16):1810-52. doi: 10.1161/CIR.0b013e31829e8807
6. Foody JM, Farrell MH, Krumholz HM. beta-Blocker therapy in heart failure: scientific review. *JAMA* 2002;287(7):883-9.
7. Nieminen MS, Brutsaert D, Dickstein K, et al. EuroHeart Failure Survey II (EHFS II): a survey on hospitalized acute heart failure patients: description of population. *Eur Heart J* 2006;27(22):2725-36. doi: 10.1093/eurheartj/ehl193
8. Harjola VP, Follath F, Nieminen MS, et al. Characteristics, outcomes, and predictors of mortality at 3 months and 1 year in patients hospitalized for acute heart failure. *Eur J Heart Fail* 2010;12(3):239-48. doi: 10.1093/eurjhf/hfq002
9. Jondeau G, Neuder Y, Eicher JC, et al. B-CONVINCED: Beta-blocker CONTinuation Vs. INTerruption in patients with Congestive heart failure hospitalized for a decompensation episode. *Eur Heart J* 2009;30(18):2186-92. doi: 10.1093/eurheartj/ehp323
10. Bohm M, Link A, Cai D, et al. Beneficial association of beta-blocker therapy on recovery from severe acute heart failure treatment: data from the Survival of Patients With Acute Heart Failure in Need of Intravenous Inotropic Support trial. *Crit Care Med* 2011;39(5):940-4. doi: 10.1097/CCM.0b013e31820a91ed
11. Sulaiman K, Panduranga P, Al-Zakwani I, et al. Clinical characteristics, management, and outcomes of acute heart failure patients: observations from the Gulf acute heart failure registry (Gulf CARE). *Eur J Heart Fail* 2015;17(4):374-84. doi: 10.1002/ejhf.245
12. Sulaiman KJ, Panduranga P, Al-Zakwani I, et al. Rationale, Design, Methodology and Hospital Characteristics of the First Gulf Acute Heart Failure Registry (Gulf CARE). *Heart Views* 2014;15(1):6-12. doi: 10.4103/1995-705X.132137
13. Butler J, Young JB, Abraham WT, et al. Beta-blocker use and outcomes among hospitalized heart failure patients. *J Am Coll Cardiol* 2006;47(12):2462-9. doi: 10.1016/j.jacc.2006.03.030
14. Cuffe MS, Califf RM, Adams KF, Jr., et al. Short-term intravenous milrinone for acute exacerbation of chronic heart failure: a randomized controlled trial. *JAMA* 2002;287(12):1541-7.
15. Gattis WA, O'Connor CM, Leimberger JD, et al. Clinical outcomes in patients on beta-blocker therapy admitted with worsening chronic heart failure. *Am J Cardiol* 2003;91(2):169-74.
16. Orso F, Baldasseroni S, Fabbri G, et al. Role of beta-blockers in patients admitted for worsening heart failure in a real world setting: data from the Italian Survey on Acute Heart Failure. *Eur J Heart Fail* 2009;11(1):77-84. doi: 10.1093/eurjhf/hfn008
17. Fonarow GC, Abraham WT, Albert NM, et al. Influence of beta-blocker continuation or withdrawal on outcomes in patients hospitalized with heart failure: findings from the OPTIMIZE-HF program. *J Am Coll Cardiol* 2008;52(3):190-9. doi: 10.1016/j.jacc.2008.03.048
18. Prins KW, Neill JM, Tyler JO, et al. Effects of Beta-Blocker Withdrawal in Acute Decompensated Heart Failure: A Systematic Review and Meta-Analysis. *JACC Heart Fail* 2015;3(8):647-53. doi: 10.1016/j.jchf.2015.03.008
19. Lohse MJ, Engelhardt S, Eschenhagen T. What is the role of beta-adrenergic signaling in heart failure? *Circ Res* 2003;93(10):896-906. doi: 10.1161/01.RES.0000102042.83024.CA
20. Onwuanyi A, Taylor M. Acute decompensated heart failure: pathophysiology and treatment. *Am J Cardiol* 2007;99(6B):25D-30D. doi: 10.1016/j.amjcard.2006.12.017
21. Gattis WA, O'Connor CM, Gallup DS, et al. PredischARGE initiation of carvedilol in patients hospitalized for decompensated heart failure: results of the Initiation Management PredischARGE: Process for Assessment

- 1  
2  
3 of Carvedilol Therapy in Heart Failure (IMPACT-HF) trial. *J Am Coll Cardiol* 2004;43(9):1534-41. doi:  
4 10.1016/j.jacc.2003.12.040
- 5 22. McMurray JJ, Adamopoulos S, Anker SD, et al. ESC guidelines for the diagnosis and treatment of acute and  
6 chronic heart failure 2012: The Task Force for the Diagnosis and Treatment of Acute and Chronic Heart  
7 Failure 2012 of the European Society of Cardiology. Developed in collaboration with the Heart Failure  
8 Association (HFA) of the ESC. *Eur J Heart Fail* 2012;14(8):803-69. doi: 10.1093/eurjhf/hfs105
- 9 23. Writing Committee M, Yancy CW, Jessup M, et al. 2013 ACCF/AHA guideline for the management of heart  
10 failure: a report of the American College of Cardiology Foundation/American Heart Association Task  
11 Force on practice guidelines. *Circulation* 2013;128(16):e240-327. doi: 10.1161/CIR.0b013e31829e8776
- 12 24. Granger CB, McMurray JJ, Yusuf S, et al. Effects of candesartan in patients with chronic heart failure and  
13 reduced left-ventricular systolic function intolerant to angiotensin-converting-enzyme inhibitors: the  
14 CHARM-Alternative trial. *Lancet* 2003;362(9386):772-6. doi: 10.1016/S0140-6736(03)14284-5
- 15 25. Effect of enalapril on survival in patients with reduced left ventricular ejection fractions and congestive heart  
16 failure. The SOLVD Investigators. *N Engl J Med* 1991;325(5):293-302. doi:  
17 10.1056/NEJM199108013250501
- 18 26. Taylor AL, Ziesche S, Yancy C, et al. Combination of isosorbide dinitrate and hydralazine in blacks with heart  
19 failure. *N Engl J Med* 2004;351(20):2049-57. doi: 10.1056/NEJMoa042934
- 20  
21  
22  
23  
24  
25  
26  
27  
28  
29  
30  
31  
32  
33  
34  
35  
36  
37  
38  
39  
40  
41  
42  
43  
44  
45  
46  
47  
48  
49  
50  
51  
52  
53  
54  
55  
56  
57  
58  
59  
60

## Footnotes

Contribution: KS, KFA, NA, AA-A, MA-J, BB, WA, MR, NB, HA, AA-M, HAF, AE, PP and JAS were involved in the design of the Gulf CARE registry and patient enrolment and ensuring quality control of the study. CAK designed the analysis and wrote the manuscript. ZM and RS carried out the statistical analyses. All authors approved the final version of the manuscript.

Funding: Gulf CARE is an investigator-initiated study conducted under the auspices of the Gulf Heart Association and funded by Servier, Paris, France; and (for centres in Saudi Arabia) by the Saudi Heart Association.

Acknowledgment: We would like to acknowledge Andrew Bliszczyk for editorial assistance.

Competing interests: None.

**Supplementary table 1:** Baseline characteristics of patients with acute decompensated chronic heart failure and a left ventricular ejection fraction <40%, on beta-blockers on admission

|                                            | <b>Patients with ADCHF with a LVEF &lt;40% and beta-blockers on admission</b><br><b>N=1018</b> | <b>Beta-blockers maintained during hospitalization</b><br><b>N=926</b> | <b>Beta-blockers withdrawn during hospitalization</b><br><b>N=92</b> | <b>p value</b> |
|--------------------------------------------|------------------------------------------------------------------------------------------------|------------------------------------------------------------------------|----------------------------------------------------------------------|----------------|
| Age (years)                                | 61.0±13.9                                                                                      | 61.1±13.7                                                              | 60.3±15.8                                                            | 0.64           |
| Male gender                                | 751(73.8%)                                                                                     | 689(74.4%)                                                             | 62(67.4%)                                                            | 0.14           |
| BMI (kg/m <sup>2</sup> )                   | 27.7±5.8                                                                                       | 27.6±5.8                                                               | 28.3±5.7                                                             | 0.28           |
| Hypertension                               | 673(66.1%)                                                                                     | 620(67.0%)                                                             | 53(57.6%)                                                            | 0.07           |
| Diabetes Mellitus                          | 569(55.9%)                                                                                     | 518(55.9%)                                                             | 51(55.4%)                                                            | 0.92           |
| Hyperlipidemia                             | 464(45.6%)                                                                                     | 419(45.2%)                                                             | 45(48.9%)                                                            | 0.50           |
| Smoking                                    | 162(15.9%)                                                                                     | 149(16.1%)                                                             | 13(14.1%)                                                            | 0.62           |
| <b>Race</b>                                |                                                                                                |                                                                        |                                                                      |                |
| Arabs                                      | 937 (92.0%)                                                                                    | 852(92.0%)                                                             | 85(92.4%)                                                            | 0.37           |
| Asians                                     | 77(7.6%)                                                                                       | 71(7.7%)                                                               | 6(6.5%)                                                              |                |
| Others                                     | 4(0.4%)                                                                                        | 3(0.3%)                                                                | 1(1.1%)                                                              |                |
| <b>Past – medical history</b>              |                                                                                                |                                                                        |                                                                      |                |
| Known CAD                                  | 676(66.4%)                                                                                     | 617(66.6%)                                                             | 59(64.1%)                                                            | 0.62           |
| Stroke /TIAs                               | 96(9.4%)                                                                                       | 89(9.6%)                                                               | 7(7.6%)                                                              | 0.53           |
| Valvular heart disease                     | 154(15.1%)                                                                                     | 139(15.0%)                                                             | 15(16.3%)                                                            | 0.74           |
| Atrial fibrillation                        | 170(16.7%)                                                                                     | 157(17.0%)                                                             | 13(14.1%)                                                            | 0.48           |
| CKD                                        | 215(21.1%)                                                                                     | 192(20.7%)                                                             | 23(25.0%)                                                            | 0.33           |
| <b>Etiology</b>                            |                                                                                                |                                                                        |                                                                      |                |
| Non-Compliance Medication                  | 300(29.5%)                                                                                     | 281(30.3%)                                                             | 19(20.7%)                                                            | 0.052          |
| IHD                                        | 204(20,0%)                                                                                     | 184(19.9%)                                                             | 20(21.7%)                                                            | 0.66           |
| HTN                                        | 46(4.5%)                                                                                       | 44(4.8%)                                                               | 2(2.2%)                                                              | 0.42           |
| Arrhythmia                                 | 61(6.0%)                                                                                       | 57(6.2%)                                                               | 4(4.3%)                                                              | 0.48           |
| Anemia                                     | 23(2.3%)                                                                                       | 20(2.2%)                                                               | 3(3.3%)                                                              | 0.45           |
| Renal failure                              | 58(5.7%)                                                                                       | 50(5.4%)                                                               | 8(8.7%)                                                              | 0.19           |
| <b>Clinical and biochemical parameters</b> |                                                                                                |                                                                        |                                                                      |                |

|                                     |             |             |             |         |
|-------------------------------------|-------------|-------------|-------------|---------|
| HR, b.p.m                           | 94.4±22.4   | 94.8±22.5   | 91.1±21.2   | 0.14    |
| SBP, mmHg                           | 126.6±30.6  | 127.8±30.3  | 114.2±31.3  | <0.001  |
| DBP, mmHg                           | 76.4±17.9   | 77.2±17.8   | 67.8±17.2   | <0.001  |
| LVEF (%)                            | 26.6±7.1    | 26.7±7.1    | 25.6±7.6    | 0.16    |
| BNP, pg/mL                          | 6847±9679   | 6851±9831   | 6777±7271   | 0.97    |
| Creatinin, mmol/L                   | 137.7±116.3 | 135.7±113.4 | 158.5±141.4 | 0.07    |
| <b>Medications</b>                  |             |             |             |         |
| Carvedilol                          | 649(63.8%)  | 589 (63.6%) | 60(65.2%)   | 0.75    |
| Bisoprolol                          | 286 (28.1%) | 265(28.6%)  | 21(22.8%)   | 0.23    |
| Metoprolol                          | 64 (6.3%)   | 57(6.2%)    | 7(7.6%)     | 0.58    |
| Atenolol                            | 19 (1.9%)   | 15(1.6%)    | 4(4.3%)     | 0.08    |
| ACE-inhibitors                      | 652(64.0%)  | 600(64.8%)  | 52(56.5%)   | 0.11    |
| ARBs                                | 180(17.7%)  | 167 (18.0%) | 13(14.1%)   | 0.34    |
| Statins                             | 751 (73.8%) | 694(74.9%)  | 57(62.0%)   | 0.007   |
| Aspirin                             | 832 (81.7%) | 768(82.9%)  | 64(69.6%)   | 0.002   |
| VKA                                 | 221(21.7%)  | 196 (21.2%) | 25(27.2%)   | 0.18    |
| Ibravadine                          | 48(4.7%)    | 42 (4.5%)   | 6(6.5%)     | 0.43    |
| Aldosterone antagonists             | 419(41.2%)  | 383 (41.4%) | 36 (39.1%)  | 0.67    |
| Clopidogrel                         | 301(29.6%)  | 274 (29.6%) | 27(29.3%)   | 0.96    |
| Diuretics                           | 920(90.4%)  | 835(90.2%)  | 85(92.4%)   | 0.49    |
| Inotrops use during hospitalization | 156 (15.3%) | 110 (11.9%) | 46 (50.0%)  | <0.001* |

All values are given as n (%) or mean ±SD. ADCHF = Acute decompensated chronic heart failure, BMI=body mass index, CAD= coronary artery disease, TIAs=transient ischemic attacks, CKD=chronic kidney disease, HR=heart rate, SBP= systolic blood pressure, DBP= diastolic blood pressure, LVEF = Left ventricular ejection fraction, VKA= Vitamin K antagonists, ARBs= Angiotensin receptor blockers.

**Supplementary table 2:** Baseline characteristics of patients with acute de-novo heart failure and a left ventricular ejection fraction <40%, on beta-Blockers on admission.

|                                 | Patients with ADCHF with a LVEF <40% and beta-blockers on admission<br>N=260 | Beta-blockers maintained during hospitalization<br>N=224 | Beta-blockers withdrawn during hospitalization<br>N=36 | p    |
|---------------------------------|------------------------------------------------------------------------------|----------------------------------------------------------|--------------------------------------------------------|------|
| Age (years)                     | 59.8±13.8                                                                    | 60.1±13.8                                                | 57.9±13.9                                              | 0.35 |
| Male gender                     | 177(68.1%)                                                                   | 151(67.4%)                                               | 26(72.2%)                                              | 0.56 |
| BMI (kg/m <sup>2</sup> )        | 28.1±5.7                                                                     | 28.1±5.8                                                 | 28.1±5.2                                               | 0.99 |
| Hypertension                    | 181(69.6%)                                                                   | 158(70.5%)                                               | 23(63.9%)                                              | 0.42 |
| Diabetes Mellitus               | 147(56.5%)                                                                   | 123(54.9%)                                               | 24(66.7%)                                              | 0.18 |
| Hyperlipidemia                  | 106(40.8%)                                                                   | 92(41.1%)                                                | 14(38.9%)                                              | 0.80 |
| Smoking                         | 67 (25.8%)                                                                   | 60(26.8%)                                                | 7(19.4%)                                               | 0.35 |
| <b>Race</b>                     |                                                                              |                                                          |                                                        |      |
| Arabs                           | 232(89.2%)                                                                   | 201 (89.7%)                                              | 31(86.1%)                                              | 0.56 |
| Asians                          | 28(10.8%)                                                                    | 23(10.3%)                                                | 5(13.9%)                                               |      |
| Others                          | -                                                                            | -                                                        | -                                                      |      |
| <b>Past – medical history</b>   |                                                                              |                                                          |                                                        |      |
| Known CAD                       | 150(57.7%)                                                                   | 130(58.0%)                                               | 20(55.6%)                                              | 0.78 |
| Stroke /TIAs                    | 29(11.2%)                                                                    | 24(10.7%)                                                | 5(13.9%)                                               | 0.57 |
| Valvular heart disease          | 19(7.3%)                                                                     | 16(7.1%)                                                 | 3 (8.3%)                                               | 0.73 |
| Atrial fibrillation             | 23(8.8 %)                                                                    | 19(8.5%)                                                 | 4(11.1%)                                               | 0.53 |
| CKD                             | 28(10.8%)                                                                    | 22(9.8%)                                                 | 6 (16.7%)                                              | 0.24 |
| <b>Etiology</b>                 |                                                                              |                                                          |                                                        |      |
| Non-Compliance Medication       | 40(15.4%)                                                                    | 37(16.5%)                                                | 3(8.3%)                                                | 0.20 |
| IHD                             | 117(45.0%)                                                                   | 100(44.6%)                                               | 17(47.2%)                                              | 0.77 |
| HTN                             | 12(4.6%)                                                                     | 11(4.9%)                                                 | 1(2.8%)                                                | 0.99 |
| Arrhythmia                      | 11(4.2%)                                                                     | 8(3.6%)                                                  | 3(8.3%)                                                | 0.18 |
| Anemia                          | 5(1.9%)                                                                      | 5(2.2%)                                                  | 0(0.0%)                                                | 0.99 |
| Renal failure                   | 9(3.5%)                                                                      | 8(3.6%)                                                  | 1(2.8%)                                                | 0.99 |
| <b>Clinical and biochemical</b> |                                                                              |                                                          |                                                        |      |

| parameters                          |             |             |             |        |
|-------------------------------------|-------------|-------------|-------------|--------|
| HR, b.p.m                           | 94.6±22.3   | 94.6±21.2   | 94.7±28.7   | 0.99   |
| SBP, mmHg                           | 133.6±32.4  | 134.6±31.9  | 126.8±35.0  | 0.19   |
| DBP, mmHg                           | 80.5±19.3   | 81.0±18.8   | 77.6±22.4   | 0.34   |
| LVEF (%)                            | 28.8±7.2    | 29.0±7.2    | 27.5±7.4    | 0.23   |
| BNP, pg/mL                          | 5227±4924   | 5361±5046   | 3883±1614   | 0.52   |
| Creatinin, mmol/L                   | 128.5±121.9 | 124.9±123.5 | 151.1±110.2 | 0.23   |
| <b>Medications</b>                  |             |             |             |        |
| Carvedilol                          | 100 (38.5%) | 84(37.5%)   | 16(44.4%)   | 0.42   |
| Bisoprolol                          | 90 (34.6%)  | 82(36.6%)   | 8(22.2%)    | 0.09   |
| Metoprolol                          | 35 (13.5%)  | 25 (11.2%)  | 10(27.8%)   | 0.01   |
| Atenolol                            | 35 (13.5%)  | 33 (14.7%)  | 2(5.6%)     | 0.18   |
| ACE-inhibitors                      | 166(63.8%)  | 150(67.0%)  | 16(44.4%)   | 0.009  |
| ARBs                                | 23(8.8%)    | 18(8.0%)    | 5(13.9%)    | 0.33   |
| Statins                             | 180(69.2%)  | 154(68.8%)  | 26(72.2%)   | 0.67   |
| Aspirin                             | 204(78.5%)  | 176(78.6%)  | 28(77.8%)   | 0.91   |
| VKA                                 | 19(7.3%)    | 16(7.1%)    | 3(8.3%)     | 0.73   |
| Ibravadine                          | 7(2.7%)     | 7(3.1%)     | 0(0.0%)     | 0.59   |
| Aldosterone antagonists             | 45(17.3%)   | 38(17.0%)   | 7(19.4%)    | 0.71   |
| Clopidogrel                         | 81(31.2%)   | 69(30.8%)   | 12(33.3%)   | 0.76   |
| Diuretics                           | 113(43.5%)  | 98(43.8%)   | 15(41.7%)   | 0.81   |
| Inotrops use during hospitalization | 51 (19.6%)  | 32 (14.3%)  | 19 (52.8%)  | <0.001 |

All values are given as n (%) or mean ±SD. ADNHF = Acute de-novo heart failure, BMI=body mass index, CAD= coronary artery disease, TIAs=transient ischemic attacks, CKD=chronic kidney disease, HR=heart rate, SBP= systolic blood pressure, DBP= diastolic blood pressure, LVEF = Left ventricular ejection fraction, VKA= Vitamin K antagonists, ARBs= Angiotensin receptor blockers.

**Supplementary table 3:** Variables after propensity score matching on inotropes in patients with acute decompensated chronic heart failure, a left ventricular ejection fraction <40% and on beta-blockers on admission.

|                               | <b>Beta-blockers continued<br/>N=92</b> | <b>Beta-blockers withdrawn<br/>N=92</b> | <b>p value</b> |
|-------------------------------|-----------------------------------------|-----------------------------------------|----------------|
| Age (years)                   | 60.3±12.7                               | 60.3±15.8                               | 0.98           |
| Male gender                   | 74 (80.4%)                              | 62(67.4%)                               | 0.044*         |
| Noncompliance with medication | 51 (55.4%)                              | 19 (20.7%)                              | <0.001*        |
| SBP, mmHg                     | 147.5±39.8                              | 114.2±31.3                              | <0.001*        |
| DBP, mmHg                     | 95.9±23.4                               | 67.8±17.2                               | <0.001*        |
| LVEF (%)                      | 28.3±6.7                                | 25.6±7.6                                | 0.011*         |
| Creatinin, mmol/L             | 126.7±103.4                             | 158.5±141.4                             | 0.08           |
| Statins                       | 79 (85.9%)                              | 57(62.0%)                               | <0.001*        |
| Aspirin                       | 92 (100.0%)                             | 64(69.6%)                               | <0.001*        |
| Inotropes                     | 46 (50.0%)                              | 46 (50.0%)                              | 1.000          |

All values are given as n (%) or mean ±SD. SBP= systolic blood pressure, DBP= diastolic blood pressure, LVEF = Left ventricular ejection fraction.



1  
2  
3  
4  
5  
6  
7  
8  
9  
10  
11  
12  
13  
14  
15  
16  
17  
18  
19  
20  
21  
22  
23  
24  
25  
26  
27  
28  
29  
30  
31  
32  
33  
34  
35  
36  
37  
38  
39  
40  
41  
42  
43  
44  
45  
46  
47  
48  
49  
50  
51  
52  
53  
54  
55  
56  
57  
58  
59  
60

**Supplementary table 4:** Variables after propensity score matching on inotropes in patients with acute de-novo heart failure, a left ventricular ejection fraction LVEF <40% and on beta-blockers on admission.

|                | <b>Beta-blockers continued<br/>N=36</b> | <b>Beta-blockers withdrawn<br/>n=36</b> | <b>p value</b> |
|----------------|-----------------------------------------|-----------------------------------------|----------------|
| Age            | 59.9±12.7                               | 57.9±13.9                               | 0.514          |
| Gender         | 11 (30.6%)                              | 10 (27.8%)                              | 0.795          |
| ACE-inhibitors | 25 (69.4%)                              | 16 (44.4%)                              | 0.032*         |
| Inotropes      | 19 (52.8%)                              | 19 (52.8%)                              | 1.000          |

All values are given as n (%) or mean ±SD.

For peer review only

## STROBE Statement—checklist of items that should be included in reports of observational studies

|                              | Item No | Recommendation                                                                                                                                                                                                                                                                                                                                                                                                                                                                                                                                                                                                                                                                                                                                                                |
|------------------------------|---------|-------------------------------------------------------------------------------------------------------------------------------------------------------------------------------------------------------------------------------------------------------------------------------------------------------------------------------------------------------------------------------------------------------------------------------------------------------------------------------------------------------------------------------------------------------------------------------------------------------------------------------------------------------------------------------------------------------------------------------------------------------------------------------|
| <b>Title and abstract</b>    | 1       | (a) Indicate the study's design with a commonly used term in the title or the abstract- done page 2<br>(b) Provide in the abstract an informative and balanced summary of what was done and what was found- done page 2                                                                                                                                                                                                                                                                                                                                                                                                                                                                                                                                                       |
| <b>Introduction</b>          |         |                                                                                                                                                                                                                                                                                                                                                                                                                                                                                                                                                                                                                                                                                                                                                                               |
| Background/rationale         | 2       | Explain the scientific background and rationale for the investigation being reported- done page 4                                                                                                                                                                                                                                                                                                                                                                                                                                                                                                                                                                                                                                                                             |
| Objectives                   | 3       | State specific objectives, including any prespecified hypotheses- done page 4                                                                                                                                                                                                                                                                                                                                                                                                                                                                                                                                                                                                                                                                                                 |
| <b>Methods</b>               |         |                                                                                                                                                                                                                                                                                                                                                                                                                                                                                                                                                                                                                                                                                                                                                                               |
| Study design                 | 4       | Present key elements of study design early in the paper- done page 5                                                                                                                                                                                                                                                                                                                                                                                                                                                                                                                                                                                                                                                                                                          |
| Setting                      | 5       | Describe the setting, locations, and relevant dates, including periods of recruitment, exposure, follow-up, and data collection- done page 5                                                                                                                                                                                                                                                                                                                                                                                                                                                                                                                                                                                                                                  |
| Participants                 | 6       | (a) <i>Cohort study</i> —Give the eligibility criteria, and the sources and methods of selection of participants. Describe methods of follow-up- done page 5<br><i>Case-control study</i> —Give the eligibility criteria, and the sources and methods of case ascertainment and control selection. Give the rationale for the choice of cases and controls- not applicable<br><i>Cross-sectional study</i> —Give the eligibility criteria, and the sources and methods of selection of participants. not applicable<br>(b) <i>Cohort study</i> —For matched studies, give matching criteria and number of exposed and unexposed, not applicable<br><i>Case-control study</i> —For matched studies, give matching criteria and the number of controls per case- not applicable |
| Variables                    | 7       | Clearly define all outcomes, exposures, predictors, potential confounders, and effect modifiers. Give diagnostic criteria, if applicable- done page 5                                                                                                                                                                                                                                                                                                                                                                                                                                                                                                                                                                                                                         |
| Data sources/<br>measurement | 8*      | For each variable of interest, give sources of data and details of methods of assessment (measurement). Describe comparability of assessment methods if there is more than one group- done page 5                                                                                                                                                                                                                                                                                                                                                                                                                                                                                                                                                                             |
| Bias                         | 9       | Describe any efforts to address potential sources of bias- done page 6                                                                                                                                                                                                                                                                                                                                                                                                                                                                                                                                                                                                                                                                                                        |
| Study size                   | 10      | Explain how the study size was arrived at- done page 5 to 6                                                                                                                                                                                                                                                                                                                                                                                                                                                                                                                                                                                                                                                                                                                   |
| Quantitative variables       | 11      | Explain how quantitative variables were handled in the analyses. If applicable, describe which groupings were chosen and why- done page 6                                                                                                                                                                                                                                                                                                                                                                                                                                                                                                                                                                                                                                     |
| Statistical methods          | 12      | (a) Describe all statistical methods, including those used to control for confounding- done page 6<br>(b) Describe any methods used to examine subgroups and interactions- done page 6<br>(c) Explain how missing data were addressed- done page 6<br>(d) <i>Cohort study</i> —If applicable, explain how loss to follow-up was addressed- done page 7<br><i>Case-control study</i> —If applicable, explain how matching of cases and controls was addressed not applicable<br><i>Cross-sectional study</i> —If applicable, describe analytical methods taking account of sampling strategy not applicable<br>(e) Describe any sensitivity analyses- done page 6                                                                                                              |

**Results**

|                          |     |                                                                                                                                                                                                                                |
|--------------------------|-----|--------------------------------------------------------------------------------------------------------------------------------------------------------------------------------------------------------------------------------|
| Participants             | 13* | (a) Report numbers of individuals at each stage of study—eg numbers potentially eligible, examined for eligibility, confirmed eligible, included in the study, completing follow-up, and analysed- page 6                      |
|                          |     | (b) Give reasons for non-participation at each stage- page 6-7                                                                                                                                                                 |
|                          |     | (c) Consider use of a flow diagram- not applicable                                                                                                                                                                             |
| Descriptive data         | 14* | (a) Give characteristics of study participants (eg demographic, clinical, social) and information on exposures and potential confounders- done page 6-7 and table 1                                                            |
|                          |     | (b) Indicate number of participants with missing data for each variable of interest- done page 6-7                                                                                                                             |
|                          |     | (c) <i>Cohort study</i> —Summarise follow-up time (eg, average and total amount)- done page 7-8                                                                                                                                |
| Outcome data             | 15* | <i>Cohort study</i> —Report numbers of outcome events or summary measures over time- done table 2 and 4                                                                                                                        |
|                          |     | <i>Case-control study</i> —Report numbers in each exposure category, or summary measures of exposure-not applicable.                                                                                                           |
|                          |     | <i>Cross-sectional study</i> —Report numbers of outcome events or summary measures-not applicable                                                                                                                              |
| Main results             | 16  | (a) Give unadjusted estimates and, if applicable, confounder-adjusted estimates and their precision (eg, 95% confidence interval). Make clear which confounders were adjusted for and why they were included- done page 6 to 8 |
|                          |     | (b) Report category boundaries when continuous variables were categorized- done page 6 to 8                                                                                                                                    |
|                          |     | (c) If relevant, consider translating estimates of relative risk into absolute risk for a meaningful time period. Not applicable                                                                                               |
| Other analyses           | 17  | Report other analyses done—eg analyses of subgroups and interactions, and sensitivity analyses- done page 7-8                                                                                                                  |
| <b>Discussion</b>        |     |                                                                                                                                                                                                                                |
| Key results              | 18  | Summarise key results with reference to study objectives- done page 8                                                                                                                                                          |
| Limitations              | 19  | Discuss limitations of the study, taking into account sources of potential bias or imprecision. Discuss both direction and magnitude of any potential bias - done page 10.                                                     |
| Interpretation           | 20  | Give a cautious overall interpretation of results considering objectives, limitations, multiplicity of analyses, results from similar studies, and other relevant evidence- done pages from 8 to 10                            |
| Generalisability         | 21  | Discuss the generalisability (external validity) of the study results- done page 10                                                                                                                                            |
| <b>Other information</b> |     |                                                                                                                                                                                                                                |
| Funding                  | 22  | Give the source of funding and the role of the funders for the present study and, if applicable, for the original study on which the present article is based- done page 13.                                                   |

\*Give information separately for cases and controls in case-control studies and, if applicable, for exposed and unexposed groups in cohort and cross-sectional studies.

**Note:** An Explanation and Elaboration article discusses each checklist item and gives methodological background and published examples of transparent reporting. The STROBE checklist is best used in conjunction with this article (freely available on the Web sites of PLoS Medicine at <http://www.plosmedicine.org/>, Annals of Internal Medicine at <http://www.annals.org/>, and Epidemiology at <http://www.epidem.com/>). Information on the STROBE Initiative is available at [www.strobe-statement.org](http://www.strobe-statement.org).

# BMJ Open

## Non-withdrawal of beta-blockers in acute decompensated chronic and de-novo heart failure in a prospective multicenter study of patients with acute heart failure in the Middle East.



|                                 |                                                                                                                                                                                                                                                                                                                                                                                                                                                                                                                                                                                                                                                                                                                                                                                                                                                                        |
|---------------------------------|------------------------------------------------------------------------------------------------------------------------------------------------------------------------------------------------------------------------------------------------------------------------------------------------------------------------------------------------------------------------------------------------------------------------------------------------------------------------------------------------------------------------------------------------------------------------------------------------------------------------------------------------------------------------------------------------------------------------------------------------------------------------------------------------------------------------------------------------------------------------|
| Journal:                        | <i>BMJ Open</i>                                                                                                                                                                                                                                                                                                                                                                                                                                                                                                                                                                                                                                                                                                                                                                                                                                                        |
| Manuscript ID                   | bmjopen-2016-014915.R2                                                                                                                                                                                                                                                                                                                                                                                                                                                                                                                                                                                                                                                                                                                                                                                                                                                 |
| Article Type:                   | Research                                                                                                                                                                                                                                                                                                                                                                                                                                                                                                                                                                                                                                                                                                                                                                                                                                                               |
| Date Submitted by the Author:   | 13-Mar-2017                                                                                                                                                                                                                                                                                                                                                                                                                                                                                                                                                                                                                                                                                                                                                                                                                                                            |
| Complete List of Authors:       | <p>Abi Khalil, Charbel<br/> Suliman, Kadhim<br/> Mahfoud, Ziyad<br/> Singh, Rajvir; Hamad Medical Corporation (HMC), Cardiology and Cardiothoracic Research Centre, Department of Cardiology and Cardiovascular Surgery,<br/> Asaad, Nidal; Hamad Medical Corporation (HMC), Cardiology and Cardiothoracic Research Centre, Department of Cardiology and Cardiovascular Surgery,<br/> AlHabib, Khalid ; King Saud University<br/> Alsheikh-Ali, Alawi<br/> Al-Jarallah, Mohammed<br/> Bulbanat, Bassam<br/> Al Mahmeed, Wael; Heart and Vascular Institute Cleveland Clinic<br/> Ridha, Mustafa<br/> Bazargani, Nooshin<br/> Amin, Haitham; MKCC, Cardiology<br/> Al-Motarreb, Ahmed; Sana University, Medicine<br/> AlFaleh, Husam; King Saud University,<br/> Elasfar, Abdelfatah<br/> Panduranga, Prashanth<br/> Al Suwaidi, Jassim; Hamad Medical Corporation,</p> |
| <b>Primary Subject Heading</b>: | Cardiovascular medicine                                                                                                                                                                                                                                                                                                                                                                                                                                                                                                                                                                                                                                                                                                                                                                                                                                                |
| Secondary Subject Heading:      | Epidemiology                                                                                                                                                                                                                                                                                                                                                                                                                                                                                                                                                                                                                                                                                                                                                                                                                                                           |
| Keywords:                       | Heart failure < CARDIOLOGY, Adult cardiology < CARDIOLOGY, Cardiac Epidemiology < CARDIOLOGY                                                                                                                                                                                                                                                                                                                                                                                                                                                                                                                                                                                                                                                                                                                                                                           |
|                                 |                                                                                                                                                                                                                                                                                                                                                                                                                                                                                                                                                                                                                                                                                                                                                                                                                                                                        |

SCHOLARONE™  
Manuscripts

1  
2  
3  
4  
5  
6  
7  
8  
9  
10  
11  
12  
13  
14  
15  
16  
17  
18  
19  
20  
21  
22  
23  
24  
25  
26  
27  
28  
29  
30  
31  
32  
33  
34  
35  
36  
37  
38  
39  
40  
41  
42  
43  
44  
45  
46  
47  
48  
49  
50  
51  
52  
53  
54  
55  
56  
57  
58  
59  
60

# Non-withdrawal of beta-blockers in acute decompensated chronic and de-novo heart failure in a prospective multicenter study of patients with acute heart failure in the Middle East.

**Charbel Abi Khalil, MD,PhD <sup>1,2,3</sup> \*; Kadhim Sulaiman, MD <sup>4</sup>; Ziyad Mahfoud, PhD <sup>5</sup>; Rajvir Singh, PhD <sup>3</sup>; Nidal Asaad, MBBS <sup>3</sup>; Khalid F AlHabib, MD <sup>6</sup>; Alawi Alsheikh-Ali, MD, MSc <sup>7</sup>; Mohammed Al-Jarallah MBChB <sup>8</sup>; Bassam Bulbanat, MBChB <sup>9</sup>; Wael AlMahmeed, MD <sup>10</sup>; Mustafa Ridha MD <sup>11</sup>; Nooshin Bazargani, MD <sup>12</sup>; Haitham Amin, MD <sup>13</sup>; Ahmed Al-Motarreb, MD <sup>14</sup>; Husam Al Faleh, MD <sup>6</sup>; Abdelfatah Elasar, MD,PhD <sup>15</sup>; Prashanth Panduranga, MBBS, MD <sup>4</sup>; Jassim Al Suwaidi, MBChB <sup>3</sup>, on behalf of the GULF-CARE group.**

1- Department of Medicine. Weill Cornell Medicine-Qatar.

2- Department of Genetic Medicine. Weill Cornell Medicine-Qatar.

3- Adult Cardiology, Heart Hospital, Hamad Medical Corporation, Doha, Qatar.

5- Division of Global and Public Health. Weill Cornell Medicine-Qatar

5-National Heart Center, Royal Hospital, Muscat, Oman.

6- Department of Cardiac Sciences, King Fahad Cardiac Center, King Saud University, Riyadh, Saudi Arabia.

7- College of Medicine, Mohammed Bin Rashid University of Medicine and Health Sciences, Dubai, UAE.

8- Department of Cardiology, Sabah Al-Ahmed Cardiac Center, Kuwait.

9- Department of Medicine, Al-Amiri Hospital, Kuwait City, Kuwait.

10- Heart and Vascular Institute. Cleveland Clinic-Abu Dhabi, UAE.

11- Department of Cardiology, Adan Hospital, Kuwait.

12- Department of Cardiology, Dubai hospital, Dubai, United Arab Emirates.

13- Department of Cardiology, Mohammed Bin Khalifa Cardiac Center, Manamah, Bahrain.

14- Department of Cardiology, Faculty of Medicine, Sana'a University, Sana'a, Yemen.

15- Cardiology Department, Tanta University, Egypt.

\* Corresponding author: Charbel Abi Khalil. MD, PhD, FESC, FACC. Weill Cornell Medicine-Qatar. PO box 24144. Doha-Qatar. Email: [cha2022@med.cornell.edu](mailto:cha2022@med.cornell.edu)

## Abstract

**Objectives:** Beta-blockers reduce mortality in heart failure (HF). However, it is not clear whether they should be temporarily withdrawn during acute HF.

**Design:** Analysis of prospectively collected data

**Setting:** The GULF-CARE (Gulf aCute heArt failuRe rEgistry) is a prospective multicenter study of patients hospitalized with acute HF in 7 Middle Eastern countries.

**Participants:** 5005 patients with acute HF.

**Outcome measures:** We studied the effect of beta-blockers non-withdrawal on intra-hospital, 3-month and 12-month mortality and hospitalization for HF in patients with acute decompensated chronic heart failure (ADCHF) and acute de-novo heart failure (ADNHF), and a LVEF < 40%.

**Results:** 44.1% of patients were already on beta-blockers on inclusion. Among those, 57.8% had a LVEF <40%. Further, 79.9% were diagnosed with ADCHF and 20.4% with ADNHF. Mean age was 61 (13.9) in the ADCHF group and 59.8 (13.8) in the ADNHF group. Ischemic heart disease was the precipitating factor in 20% of the ADCHF group and 45% in the ADNHF. Intra-hospital mortality was lower in patients whose beta-blocker therapy was not withdrawn in both the ADCHF and ADNHF groups. This protective effect persisted after multivariate analysis (OR 0.05, 95% CI [0.02-0.11]; OR 0.04, 95% CI [0.01-0.16]; respectively,  $p < 0.001$  for both) and propensity score matching (OR 0.08, 95% CI [0.01-0.46]; OR 0.04, 95% CI [0.01-0.16]; respectively,  $p < 0.006$  for both). At 3 months, mortality was still lower only in ADCHF patients in whom beta-blockers were maintained during initial hospitalization. However, the benefit was lost after correcting for confounding factors. Interestingly, hospitalization for HF and length of hospital stay were unaffected by beta-blockers discontinuation in all patients.

**Conclusion:** In summary, non-withdrawal of beta-blockers in acute decompensated chronic heart failure and acute de-novo heart failure is associated with lower intra-hospital mortality.

**Trial registration number:** NCT01467973.

1  
2  
3  
4  
5  
6  
7  
8  
9  
10  
11  
12  
13  
14  
15  
16  
17  
18  
19  
20  
21  
22  
23  
24  
25  
26  
27  
28  
29  
30  
31  
32  
33  
34  
35  
36  
37  
38  
39  
40  
41  
42  
43  
44  
45  
46  
47  
48  
49  
50  
51  
52  
53  
54  
55  
56  
57  
58  
59  
60

**Keywords**

Heart failure

Beta-blockers

Acute decompensated chronic heart failure

Acute de-novo heart failure

For peer review only

## Strengths and limitations of this study

This is the first study to assess non-withdrawal of beta-blockers in de-novo heart failure.

Like any observational study, selection bias could exist. Moreover, the decision of beta-blocker withdrawal during acute heart failure could have been due to different factors that we did not account for in our analysis.

Furthermore, no information was available regarding the dose of beta-blockers, in particular whether the dose was reduced in patients who continued to use beta-blockers during acute decompensation.



## Introduction

Since the publication of the MERIT-HF, CIBIS-II, US Carvedilol Heart failure and COPERNICUS trials<sup>1-4</sup>, in which beta-blockers improved survival in heart failure (HF) patients, international guidelines recommended using this drug class as first-line treatment in chronic HF along with the renin-angiotensin system blockers<sup>5</sup>. Initial safety concerns regarding the use of beta-blockers in patients with HF were dropped with the emergence of several studies that demonstrated up to 30% decrease in mortality risk in those patients<sup>6</sup>. Despite the improvement in the treatment and prognosis of chronic HF, acute HF remains a challenging condition, treatment of which is essentially symptomatic. In the EuroHeart Failure Survey II, in-hospital mortality of patients with acute HF was about 7%<sup>7</sup>, and one-year mortality above 20%<sup>8</sup>. The continuation of beta-blockers during acute HF remains controversial and subject to clinical judgment. The Beta-blocker CONTinuation Vs. INTerruption in patients with Congestive heart failure hospitalized for a decompensation episode (B-CONVINCED) trial, a randomized, controlled, open-labeled study that compared continuation *versus* withdrawal of beta-blockers during acute HF did not report any short-term or long-term benefit in patients assigned to continue their treatment<sup>9</sup>. In a post-hoc analysis of the Survival of Patients With Acute Heart Failure in Need of Intravenous Inotropic Support (SURVIVE) study that had a similar design to B-CONVINCED, 1-month and 3-month mortality decreased in patients whose beta-blockers were not withdrawn during initial hospitalization<sup>10</sup>. However, the protective effect was lost after correcting for classical heart failure covariates.

Currently, there is no large-scale data from the Middle East (ME) with regard to beta-blockers use in HF. The aim of this paper is to report on use of beta-blockers in patients admitted with acute HF and to assess short-term and long-term consequences of withdrawal or continuation of beta-blockers in HF patients with left ventricular dysfunction in the ME.

## Methods

The Gulf CARE (Gulf aCute heArt failuRe registry) is a multinational multicenter prospective observational acute heart failure survey based on cases admitted to various hospitals in 7 countries from the Gulf Middle East, namely Oman, Saudi Arabia, United Arab Emirates (UAE), Qatar, Bahrain, Yemen, and Kuwait. Details of the recruitment of patients, the study design and methods have been published previously<sup>11 12</sup>. In brief, we collected data, as per the case report form, of patients with acute HF from both genders who were above 18 years of age admitted to the participating hospitals. Recruitment started in February 2012 and ended on November 13, 2012. This was preceded by a pilot phase of 1 month in November 2011. The registry continued to follow-up patients at 3 months and 1 year. The registry protocol was approved by each participating center's research ethics committee or institutional review board (IRB): Directorate of research and studies, Ministry of Health - Sultanate of Oman; King Saud University's IRB, Kingdom of Saudi Arabia; Sheikh Khalifa medical city's IRB, UAE; Hamad Medical Corporation's IRB, Qatar; Mohammed Bin Khalifa cardiac center's IRB, Bahrain; Sana'a University' IRB, Yemen and Ministry of health's IRB in Kuwait. The study was registered at clinicaltrials.gov with number NCT01467973. A written informed consent was obtained from all patients

Acute HF was further classified as either acute decompensated chronic heart failure (ADCHF) or acute de-novo heart failure (ADNHF). ADCHF was defined as worsening of HF in patients with a previous diagnosis or hospitalization for HF. ADNHF was defined as acute HF in patients with no prior history of heart failure. All patients were followed-up at 3 months by telephone, and at 1 year either by telephone or by a clinic visit. The registry data was collected on-line using a dedicated Web-site including demographics, risk factors, medical history, clinical manifestations, investigations, medications with dose and management. The participating hospitals ranged from secondary care hospitals to tertiary care hospitals with interventional facilities including device therapy.

1  
2  
3 The inclusion criteria for this analysis was those patients who were on beta-blockers at time of  
4 admission and had a left ventricular ejection fraction (LVEF) < 40%. Those patients with preserved left  
5 ventricular function and not on beta-blockers at time of admission were excluded from further analysis.  
6  
7 Furthermore, 2 cohorts were created, the first with ADCHF and the second with ADNHF. The main  
8 outcome measures were mortality, hospitalization for HF, and length of hospital stay. A scheme of the  
9 current prospective trial is described in figure 1.  
10  
11  
12  
13  
14  
15  
16  
17  
18  
19

20 Baseline categorical variables and outcome measures were summarized using frequency distributions  
21 while means and standard deviations were used for numeric variables. Outcome measures and  
22 baseline patients' characteristics were compared between the two groups: withdrawal and non-  
23 withdrawal of beta-blockers using the Chi-squared test (or Fisher's exact test when expected cell  
24 counts fell below 5) for categorical variables and the student's t test or Wilcoxon rank sum test for  
25 numeric variables. Multivariate logistic regression analysis performed for in-hospital and 3-months  
26 included variables that were significantly different between the two groups in addition to age and  
27 gender. Adjusted Odds Ratios (OR) and 95% Confidence intervals with p values are presented. All  
28 analyses were done separately for the ADCHF and ADNHF patients. In addition, several sensitivity  
29 analyses were performed. Propensity scores were computed using logistic regression with membership  
30 in the two groups as the outcome and baseline variables that were significantly different between the  
31 groups as the independent variables. These scores were used to adjust the association between the  
32 mortality outcomes and the main variable (membership in each group) using multivariate logistic  
33 regression. Moreover, propensity score matching using the most influential variable (inotropes) was  
34 used and the main comparison between the two groups was assessed with and without adjustment to  
35 variables that were still significantly different between the two groups even after matching. This latter  
36 analysis was not done for the ADNHF groups as the sample sizes became small after matching.  
37 Statistical significance was set at the 5% level. All analyses were done using IBM-SPSS version 23.0.  
38  
39  
40  
41  
42  
43  
44  
45  
46  
47  
48  
49  
50  
51  
52  
53  
54  
55  
56  
57  
58  
59  
60

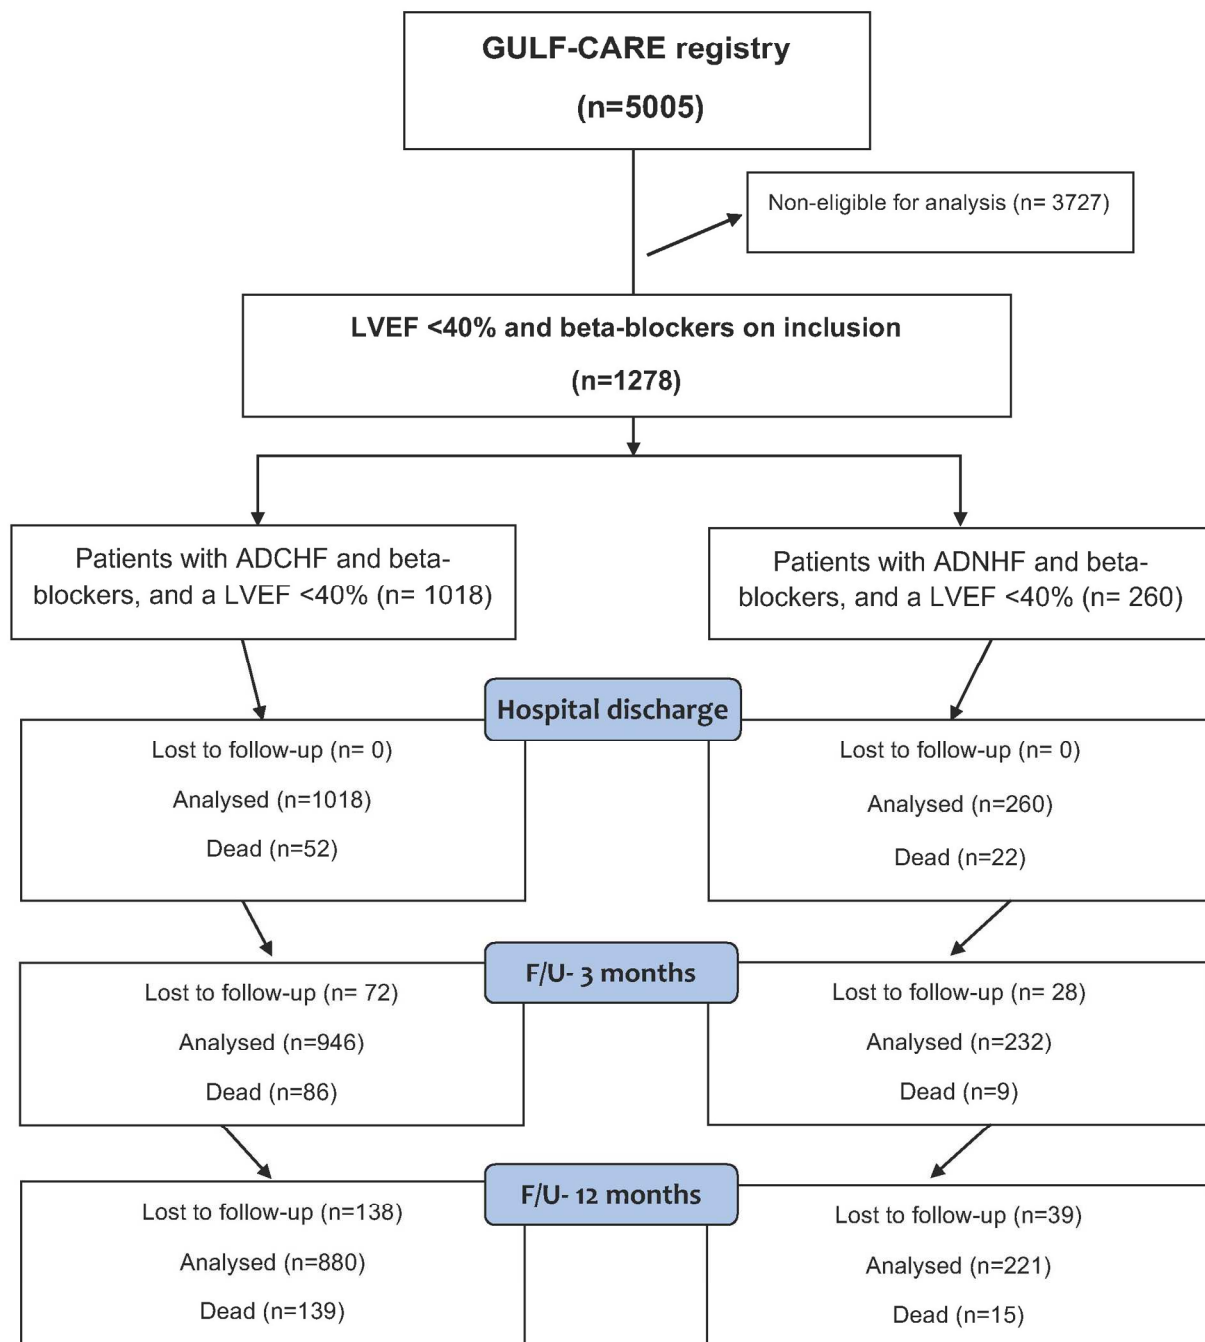

**Figure 1:** Flow chart of the current prospective analysis. 1278 patients with a LVEF <40% and beta-blockers on admission were analyzed from the 5005 participants in the GULF-CARE registry. ADCHF = Acute decompensated chronic heart failure, ADNHF = Acute de-novo heart failure, LVEF = Left ventricular ejection fraction. F/U = Follow-up.

## Results:

Out of the total 5005 participants in the GULF-CARE, 2208 (44.1%) patients were already on beta-blockers on inclusion. Further, beta-blockers were prescribed in 1278 (42.2%) patients with a LVEF <40%. Among those, 1018 (79.9%) were diagnosed with acute decompensated chronic HF (ADCHF) and 260 (20.4%) with acute do-novo heart failure (ADNHF). As shown in table 1, Patients with ADCHF tended to have more comorbidities than patients with ADNHF. They had a higher prevalence of coronary artery disease (CAD), chronic kidney disease (CKD), valvular heart disease, atrial fibrillation (AF) and a lower LVEF; which could explain the more common use of angiotensin receptor antagonists (ARBs), aldosterone antagonists, vitamin K antagonists (VKA) and diuretics in these patients. Interestingly, they smoked less, a phenomenon that could be due to the effect of earlier life-style changes and anti-smoking campaigns in patients with CHF.

**Table 1:** Baseline characteristics of patients on beta-blockers on admission and a left ventricular ejection fraction <40% included in the Gulf-Care.

|                          | All patients in Gulf Care<br>N=5005 | Patients with a LVEF <40% on beta-blockers on admission<br>N=1278             |                                                                             | P value * |
|--------------------------|-------------------------------------|-------------------------------------------------------------------------------|-----------------------------------------------------------------------------|-----------|
|                          |                                     | Patients with ADCHF and a LVEF <40%, on beta-blockers on admission.<br>N=1018 | Patients with ADNHF and a LVEF<40%, on beta-blockers on admission.<br>N=260 |           |
| Age (years)              | 59±15                               | 61.0±13.9                                                                     | 59.8±13.8                                                                   | 0.21      |
| Male gender              | 3131(62.6%)                         | 751(73.8%)                                                                    | 177(68.1%)                                                                  | 0.07      |
| BMI (kg/m <sup>2</sup> ) | 28±6                                | 27.7±5.8                                                                      | 28.1±5.7                                                                    | 0.26      |
| Hypertension             | 3059(61.1%)                         | 673(66.1%)                                                                    | 181(69.6%)                                                                  | 0.29      |
| Diabetes Mellitus        | 2492(49.8%)                         | 569(55.9%)                                                                    | 147(56.5%)                                                                  | 0.86      |

|                                            |             |             |             |       |
|--------------------------------------------|-------------|-------------|-------------|-------|
| Hyperlipidemia                             | 1799(35.9%) | 464(45.6%)  | 106(40.8%)  | 0.16  |
| Smoking                                    | 1103(22%)   | 162(15.9%)  | 67 (25.8%)  | 0.001 |
| <b>Race</b>                                |             |             |             |       |
| Arabs                                      | 4516(90.2%) | 937 (92.0%) | 232(89.2%)  | 0.04  |
| Asians                                     | 473(9.5%)   | 77(7.6%)    | 28(10.8%)   |       |
| Others                                     | 16(0.3%)    | 4(0.4%)     | -           |       |
| <b>Past – medical history</b>              |             |             |             |       |
| Known CAD                                  | 2337(46.7%) | 676(66.4%)  | 150(57.7%)  | 0.008 |
| Stroke /TIAs                               | 404(8%)     | 96(9.4%)    | 29(11.2%)   | 0.40  |
| Valvular heart disease                     | 675(13.5%)  | 154(15.1%)  | 19(7.3%)    | 0.001 |
| Atrial fibrillation                        | 607(12%)    | 170(16.7%)  | 23(8.8 %)   | 0.001 |
| CKD                                        | 744(14.9%)  | 215(21.1%)  | 28(10.8%)   | 0.001 |
| <b>Etiology</b>                            |             |             |             |       |
| Non-Compliance Medication                  | 964(19%)    | 300(29.5%)  | 40(15.4%)   | 0.05  |
| IHD                                        | 1365(27%)   | 204(20,0%)  | 117(45.0%)  | 0.67  |
| HTN                                        | 410(8.2%)   | 46(4.5%)    | 12(4.6%)    | 0.26  |
| Arrhythmia                                 | 301(6%)     | 61(6.0%)    | 11(4.2%)    | 0.49  |
| Anemia                                     | 143(3.1%)   | 23(2.3%)    | 5(1.9%)     | 0.50  |
| Renal failure                              | 221(4.4%)   | 58(5.7%)    | 9(3.5%)     | 0.19  |
| <b>Clinical and biochemical parameters</b> |             |             |             |       |
| HR, b.p.m                                  | 77.6±12.8   | 94.4±22.4   | 94.6±22.3   | 0.92  |
| SBP, mmHg                                  | 118±18      | 126.6±30.6  | 133.6±32.4  | 0.002 |
| DBP, mmHg                                  | 70±12       | 76.4±17.9   | 80.5±19.3   | 0.001 |
| LVEF (%)                                   | 36.9±14     | 26.6±7.1    | 28.8±7.2    | 0.001 |
| BNP, pg/mL                                 | 5324±4523   | 6847±9679   | 5227±4924   | 0.21  |
| Creatinine, mmol/L                         | 130±116     | 137.7±116.3 | 128.5±121.9 | 0.24  |
| <b>Medications</b>                         |             |             |             |       |

|                                      |             |             |             |       |
|--------------------------------------|-------------|-------------|-------------|-------|
| Carvedilol                           | 1099(21.9%) | 649(63.8%)  | 100 (38.5%) | 0.001 |
| Bisoprolol                           | 626 (12.5%) | 286 (28.1%) | 90 (34.6%)  | 0.04  |
| Metoprolol                           | 299 (5.9%)  | 64 (6.3%)   | 35 (13.5%)  | 0.001 |
| Atenolol                             | 184 (3.6%)  | 19 (1.9%)   | 35 (13.5%)  | 0.001 |
| ACE-inhibitors                       | 2762(55.2%) | 652(64.0%)  | 166(63.8%)  | 0.96  |
| ARBs                                 | 645(12.9%)  | 180(17.7%)  | 23(8.8%)    | 0.001 |
| Statins                              | 2555(51%)   | 751 (73.8%) | 180(69.2%)  | 0.14  |
| Aspirin                              | 3089(61.7%) | 832 (81.7%) | 204(78.5%)  | 0.23  |
| VKA                                  | 618(12%)    | 221(21.7%)  | 19(7.3%)    | 0.001 |
| Ibravadine                           | 115(2.3%)   | 48(4.7%)    | 7(2.7%)     | 0.15  |
| Aldosterone antagonists              | 840(16.8%)  | 419(41.2%)  | 45(17.3%)   | 0.001 |
| Clopidogrel                          | 966(19%)    | 301(29.6%)  | 81(31.2%)   | 0.61  |
| Diuretics                            | 2882(57.6%) | 920(90.4%)  | 113(43.5%)  | 0.001 |
| Inotropes use during hospitalization | 783 (16%)   | 156 (15.3%) | 51 (19.6%)  | 0.96  |

All values are given as n (%) or mean  $\pm$ SD. \* p value: patients with acute decompensated chronic heart failure and LVEF <40% on beta-blockers on admission vs. de - Novo heart failure and LVEF <40% on beta-blockers on admission. ADCHF = Acute decompensated chronic heart failure, ADNHF = Acute de-novo heart failure, BMI=body mass index, CAD= coronary artery disease, TIAs=transient ischemic attacks, CKD=chronic kidney disease, HR=heart rate, SBP= systolic blood pressure, DBP= diastolic blood pressure, LVEF = Left ventricular ejection fraction, VKA= Vitamin K antagonists, ARBs= Angiotensin receptor blockers.

Beta-blockers were withdrawn in 10% of the patients in the ADCHF group and 13.8% in the ADNHF group. Those ADCHF patients in whom beta-blockers were discontinued had a lower blood pressure at inclusion and half of them required inotropic support during hospitalization (**supplementary table 1**). ADNHF patients who continued beta-blockade therapy were more commonly prescribed ACE-inhibitors and required less inotropic support (**supplementary table 2**).

In the ADCHF group, 15 (1.6%) in-hospital deaths occurred in patients whose beta-blocker therapy was not withdrawn as compared to 37 (40.2%) when beta-blockers were discontinued ( $p < 0.001$ ) (**Table 2**).

**Table 2:** Effect of non-withdrawal of beta-blockers in acute decompensated chronic heart failure with beta-blocker therapy on admission and a LVEF  $< 40\%$

|                            | All patients with acute decompensated heart failure, LVEF $< 40\%$ and on beta-treatment on admission<br>N=1018 | Beta-blockers maintained during hospitalization<br>N=926(91%) | Beta-blockers withdrawn during hospitalization<br>N=92(9.0%) | P value     |
|----------------------------|-----------------------------------------------------------------------------------------------------------------|---------------------------------------------------------------|--------------------------------------------------------------|-------------|
| <b>In-hospital outcome</b> |                                                                                                                 |                                                               |                                                              |             |
| Death                      | 52/1018(5.1%)                                                                                                   | 15/926(1.6%)                                                  | 37/92(40.2%)                                                 | $< 0.001^*$ |
| Length of stay             | 9.9 $\pm$ 15.0                                                                                                  | 9.7 $\pm$ 15.1                                                | 12.3 $\pm$ 13.6                                              | 0.1         |
| <b>3-month follow-up</b>   |                                                                                                                 |                                                               |                                                              |             |
| Death                      | 86/946(9.1%)                                                                                                    | 77/896(8.6%)                                                  | 9/50(18.0%)                                                  | 0.038       |
| Hospitalization for HF     | 219/859(25.5%)                                                                                                  | 204/818(24.9%)                                                | 15/41(36.6%)                                                 | 0.09        |
| Length of stay (days)      | 8.1 $\pm$ 7.6                                                                                                   | 8.1 $\pm$ 7.8                                                 | 7.7 $\pm$ 4.3                                                | 0.86        |
| <b>12-month follow-up</b>  |                                                                                                                 |                                                               |                                                              |             |
| Death                      | 139/880(15.8%)                                                                                                  | 128/835(15.3%)                                                | 11/45(24.4%)                                                 | 0.10        |
| Hospitalization for HF     | 333/741 (44.9%)                                                                                                 | 316/707 (44.7%)                                               | 17/34 (50.0%)                                                | 0.54        |
| Length of stay (days)      | 9.6 $\pm$ 12.0                                                                                                  | 9.6 $\pm$ 12.1                                                | 10.9 $\pm$ 11.1                                              | 0.73        |

The frequencies and percentages for death, hospitalization for heart failure (HF) and length of stay during hospitalization. Death rates were cumulative. All values are given as n (%) or mean  $\pm$ SD.



Multivariate analysis showed that age, gender, non-compliance to medication, SBP, DBP, creatinine and statins were not predictors of in-hospital mortality in case of non-withdrawal of beta-blockers. As expected, inotropic use was significantly associated with higher mortality in our model (**Table 3**).

**Table 3:** Multivariate analysis for intra-hospital and 3-month mortality in patients with ACDHF, a LVEF <40% and beta-blockers on admission.

|                       | Variable                          | OR                                        | 95% .C.I     | P value |  |
|-----------------------|-----------------------------------|-------------------------------------------|--------------|---------|--|
| In-hospital mortality | Age                               | 1.022                                     | 0.991-1.055  | 0.17    |  |
|                       | Gender                            | 1.058                                     | 0.428-2.618  | 0.90    |  |
|                       | Non-compliance to medication      | 1.736                                     | 0.642-4.698  | 0.27    |  |
|                       | SBP                               | 0.990                                     | 0.968-1.014  | 0.41    |  |
|                       | DBP                               | 1.003                                     | 0.964-1.044  | 0.87    |  |
|                       | LVEF                              | 1.053                                     | 0.998-1.003  | 0.07    |  |
|                       | Creatinine                        | 1.001                                     | 0.998-1.001  | 0.59    |  |
|                       | Aspirin                           | 1.357                                     | 0.477-3.865  | 0.56    |  |
|                       | Statins                           | 2.083                                     | 0.763-5.684  | 0.15    |  |
|                       | Inotropes                         | 20.368                                    | 8.241-50.337 | <0.001* |  |
|                       | <b>Beta-blockers on discharge</b> |                                           |              |         |  |
|                       |                                   | Beta-blockers withdrawn (reference group) | 1            | -       |  |
|                       | Beta-blockers maintained          | 0.050                                     | 0.022-0.112  | <0.001* |  |

|                          |                                           |             |             |        |
|--------------------------|-------------------------------------------|-------------|-------------|--------|
| <b>3-month mortality</b> | Age                                       | 1.029       | 1.010-1.048 | 0.002* |
|                          | Gender                                    | 0.974       | 0.579-1.638 | 0.92   |
|                          | Non-compliance to medication              | 1.267       | 0.753-2.133 | 0.37   |
|                          | SBP                                       | 0.993       | 0.980-1.005 | 0.26   |
|                          | DBP                                       | 1.005       | 0.984-1.026 | 0.66   |
|                          | LVEF                                      | 1.003       | 0.970-1.037 | 0.87   |
|                          | Creatinine                                | 1.001       | 1.000-1.003 | 0.15   |
|                          | Aspirin                                   | 1.516       | 0.828-2.777 | 0.17   |
|                          | Statins                                   | 1.307       | 0.747-2.284 | 0.34   |
|                          | Inotropes                                 | 1.456       | 0.759-2.793 | 0.25   |
|                          | <b>Beta-blockers on discharge</b>         |             |             |        |
|                          | Beta-blockers withdrawn (reference group) | 1           |             |        |
| Beta-blockers maintained | 0.513                                     | 0.231-1.143 | 0.10        |        |

SBP= systolic blood pressure, DBP = diastolic blood pressure, LVEF = Left ventricular ejection fraction.

Nevertheless, non-withdrawal of beta-blockers was associated with less mortality risk even after correcting for all the parameters (OR=0.05, 95% CI: 0.022-0.112,  $p<0.001$ ). To confirm our findings, we performed a propensity score matching on inotropic use (**supplementary Table 3**). Non-withdrawal of beta-blockers was associated with less mortality in the propensity model (OR=0.05, 95% CI: 0.015-0.170,  $p<0.001$ ), even after correcting for variables that remained significantly different in the new model (OR=0.084, 95% CI: 0.015-0.468,  $p=0.005$ ). At 3 months, fewer deaths also occurred in the group of patients whose beta-blockers therapy was not withdrawn ( $p=0.038$ ). However, after multivariate logistic regression analysis, the protection conferred by beta-blockade continuation was lost (OR=0.513, 95% CI: 0.231-1.143,  $p=0.10$ ).

In the ADNHF group, 5 (2.2%) in-hospital deaths occurred in patients whose beta-blocker therapy was not withdrawn as compared to 17 (47.2%) when beta-blockers were discontinued ( $p < 0.001$ ). However, mortality rates were comparable at 3 months and one year (**Table 4**).

**Table 4:** Effect of non-withdrawal of beta-blockers in acute decompensated de-novo heart failure with beta-blocker therapy on admission and LVEF  $< 40\%$

|                            | All patients with de-novo heart failure, LVEF $< 40\%$ and on beta-blockers treatment on admission.<br>N=260 | Beta-blockers maintained during hospitalization<br>N=224(86.2%) | Beta-blockers withdrawn during hospitalization<br>N=36(13.8%) | p- value    |
|----------------------------|--------------------------------------------------------------------------------------------------------------|-----------------------------------------------------------------|---------------------------------------------------------------|-------------|
| <b>In-hospital outcome</b> |                                                                                                              |                                                                 |                                                               |             |
| Death                      | 22/260(8.5%)                                                                                                 | 5/224(2.2%)                                                     | 17/36(47.2%)                                                  | $< 0.001^*$ |
| Length of stay             | 9.7 $\pm$ 16.1                                                                                               | 9.6 $\pm$ 16.6                                                  | 10.1 $\pm$ 12.1                                               | 0.86        |
| <b>3 months follow-up</b>  |                                                                                                              |                                                                 |                                                               |             |
| Death                      | 9/232(3.9%)                                                                                                  | 7/214(3.3%)                                                     | 2/18(11.1%)                                                   | 0.14        |
| Hospitalization for HF     | 39/223(17.5%)                                                                                                | 38/207(18.4%)                                                   | 1/16(6.3%)                                                    | 0.31        |
| Length of stay             | 8.8 $\pm$ 9.8                                                                                                | 8.8 $\pm$ 9.9                                                   | 8.0 $\pm$ NE                                                  | NE          |
| <b>At 1 year follow-up</b> |                                                                                                              |                                                                 |                                                               |             |
| Death                      | 15/221(6.8%)                                                                                                 | 13/206(6.3%)                                                    | 2/15(13.3%)                                                   | 0.27        |
| Hospitalization for HF     | 61/206(29.6%)                                                                                                | 73/193(37.8%)                                                   | 3/13(23.1%)                                                   | 0.38        |
| Length of stay             | 7.9 $\pm$ 7.5                                                                                                | 8.2 $\pm$ 7.6                                                   | 2.7 $\pm$ 2.1                                                 | 0.21        |

The frequencies and percentages for death, hospitalization for heart failure (HF) and length of stay during hospitalization. Death rates were cumulative. All values are given as n(%) or mean  $\pm$ SD.

Multivariate analysis did not show that age, gender or Ace-inhibitors, which were different among both groups, predicted mortality (**Table 5**).

**Table 5:** Multivariate analysis for intra-hospital death in patients with ADNHF, a LVEF <40% and beta-blockers on admission

| Variable                                  | OR      | 95 % C.I        | P value |
|-------------------------------------------|---------|-----------------|---------|
| Age                                       | 1.047   | 0.992-1.105     | 0.097   |
| Gender                                    | 2.179   | 0.431-10.989    | 0.346   |
| ACE-inhibitors                            | 1.112   | 0.215-5.757     | 0.899   |
| Inotropes                                 | 172.272 | 16.002-1854.600 | <0.001* |
| <b>Beta-blockers</b>                      |         |                 |         |
| Beta-blockers withdrawn (reference group) | 1       |                 |         |
| Beta-blockers maintained                  | 0.018   | 0.003-0.122     | <0.001* |

SBP= systolic blood pressure, DBP = diastolic blood pressure, LVEF = Left ventricular ejection fraction.

Similarly, to the ADCHF, inotropic use was highly associated with mortality. We also performed a propensity score matching on inotropic use (**supplementary Table 4**) and confirmed that beta-blocker continuation in ADNHF has a favorable outcome (OR=0.05, 95% CI: 0.015-0.170, p<0.001), even after correcting for variables that remained significantly different between both groups in the new model (OR=0.047, 95% CI: 0.013-0.169, p<0.001). Similarly to patients with ADCHF, hospitalization for HF and length of stay were unaffected by the withdrawal of beta-blockers.

## Discussion

This observational study demonstrates that pursuing beta-blocker therapy during acute HF confers to patients with chronic and de-novo HF cardiovascular protection and decreases mortality. Interestingly, randomized placebo-controlled trials that assessed pursuing beta-blockers versus withdrawal during acute HF are missing; available data are extrapolated from post-hoc analysis. The B-convinced was designed as a non-inferiority trial and demonstrated only safety of beta-blockers during acute decompensation<sup>9</sup>. In a retrospective analysis of the SURVIVE study that initially assessed 2 inotropic treatments in critical patients with acute HF, the benefit associated with non-withdrawal of beta-blockers was lost after correcting for HF covariates; only patients who never received beta-blockers had a worse outcome as compared to patients who were on these drugs at inclusion and on discharge<sup>10</sup>. In a sub-analysis of the Evaluation Study of Congestive Heart Failure and Pulmonary Artery Catheterization (ESCAPE) that assessed pulmonary artery catheter use among patients admitted with acute HF, patients already prescribed beta-blockers on admission had a lower 6-month mortality risk and a shorter hospitalization stay<sup>13</sup>. Outcomes of the Prospective Trial of Intravenous Milrinone for Exacerbations of Chronic Heart Failure (OPTIME-CHF), designed as a randomized placebo-controlled trial, failed to test the superiority of milrinone to placebo in patients with ADCHF<sup>14</sup>. Further observational analysis showed that withdrawal of beta-blockers was associated with a greater risk of 2-month mortality and re-hospitalization for HF despite limitations due to the use of milrinone in those patients and the small number of patients analyzed<sup>15</sup>.

Our results are comparable to previous observational studies from North America and Europe. In the Italian Survey on Acute Heart Failure, withdrawal of beta-blockers during acute HF was associated with almost 4-fold increase in the risk of intra-hospital mortality<sup>16</sup>. The Organized Program to Initiate Lifesaving Treatment in Hospitalized Patients with Heart Failure (OPTIMIZE-HF) is one of the largest Northern American registries of patients admitted with acute HF. Maintenance of beta-blockers during

1  
2  
3 acute decompensation was associated with better outcome in post-discharge mortality<sup>17</sup>. Consistent  
4  
5 with our findings, Prins et al reported in a recent meta-analysis that included over 2700 patients treated  
6  
7 with beta-blockers and hospitalized for acute HF, that withdrawal of beta-blockers significantly  
8  
9 increased in-hospital and short term mortality, and re-hospitalization for HF<sup>18</sup>.

10  
11  
12 Despite firm safety data and un-doubted long-term benefit, beta-blocker therapy remains under-  
13  
14 prescribed. In our study, only 44.1% of all patients presenting with acute HF and 44.2 % of patients with  
15  
16 a LVEF<40% were treated with beta-blockers. The frequency of beta-blockers prescription is variable  
17  
18 according to cohorts and ranges from 32% in the “Italian Survey on Acute Heart Failure” study<sup>16</sup> to  
19  
20 53.3% in the SURVIVE study<sup>10</sup> and 62% in the ESCAPE trial<sup>13</sup>.

21  
22  
23 It is not known why withdrawal of beta-blockers in acute HF is associated with a worse prognosis.  
24  
25 Activation of the sympathetic system, increase of catecholamine levels and alterations in cardiac  $\beta$ -  
26  
27 receptors are the hallmark of chronic HF; therefore beta-blocker therapy in chronic HF could limit the  
28  
29 deleterious effect of chronic  $\beta$ -receptor stimulation such as arrhythmias, hypertrophy and  
30  
31 cardiomyocytes apoptosis<sup>19</sup>. It may be possible that withdrawal of beta-blockers in the acute phase  
32  
33 takes away earlier protective effect of beta-adrenergic inhibition at a time when the neuro-hormonal  
34  
35 system is activated and catecholamines are significantly increased<sup>20</sup>.

36  
37  
38  
39  
40 Managing beta-blockers during acute HF is still unclear to most physicians. The Process for  
41  
42 Assessment of Carvedilol Therapy in Heart Failure (IMPACT-HF) trial investigators were the first to  
43  
44 report that in-hospital initiation of beta-blockers was safe compared to post-discharge<sup>21</sup>. The latest  
45  
46 guidelines from both the Society of Cardiology (ESC)<sup>22</sup> and the American college of Cardiology  
47  
48 foundation (ACCF)/American heart association (AHA)<sup>23</sup> recommend initiating a beta-blocker therapy  
49  
50 following acute HF as soon as the patient is stable and before discharge. However, uncertainty persists  
51  
52 in regards to continuing beta-blockers during an acute decompensation. Beta-blockade therapy  
53  
54 discontinuation during AHF is variable. In older studies such as the OPTIME-CHF, beta-blockers were  
55  
56  
57  
58  
59  
60

1  
2  
3 withdrawn in over 20% of patients <sup>15</sup>. In our study, beta-blockers were withdrawn in 10% of patients with  
4  
5 ADCHF and 13.8% of patients with ADNHF. Those numbers are almost similar to the Italian Survey on  
6  
7 Acute Heart Failure in which Orso et al reported a withdrawal rate of 9% in all AHF patients with beta-  
8  
9 blockers on admission <sup>16</sup> However, Bohm et al reported a lower rate ( 6.8%) in the retrospective  
10  
11 analysis of the SURVIVE study<sup>10</sup>.  
12  
13

14  
15 It is not known why mortality risk reduction extends up to 3 months in ADCHF but not in ADNHF  
16  
17 although the first group has higher cardiovascular comorbidities and more severe risk factors. One  
18  
19 explanation could be the higher prescription of cardioprotective drugs such as ACE inhibitors, ARBs,  
20  
21 diuretics; all having shown to reduce mortality in patients with chronic HF and improve the outcome <sup>24-</sup>  
22  
23 <sup>26</sup>. One other explanation would also be the frequent use of beta-blockers approved for HF in patients  
24  
25 with ADCHF whereas the prescription of non-HF selective beta-blockers such as atenolol was more  
26  
27 common in ADNHF. Finally, we cannot rule out that the relatively small number of patients with  
28  
29 ADNHF, coupled to an even smaller death rate at 3 months, does not enable us draw any meaningful  
30  
31 conclusions on long-term mortality in those patients.  
32  
33  
34

35  
36 Our study has a few limitations. Like any observational study, selection bias could exist. The decision of  
37  
38 beta-blocker withdrawal during acute HF could have been to different factors not accounted for in our  
39  
40 analysis. Beta-blocker therapy could have been withdrawn in the more severe patients with a poor  
41  
42 prognosis. Despite the correction on available cofounding factors, we could have missed other markers  
43  
44 of disease severity that were not recorded in the cohort. In addition, we could not determine whether  
45  
46 the dosage of beta-blockers on admission, or any reduction during hospitalization, might have  
47  
48 influenced the outcome. Finally, the duration of beta-blocker treatment prior to acute HF was not  
49  
50 recorded; this variable could also be a confounding factor since long-term beta-blocker treatment could  
51  
52 have been more beneficial than short-term.  
53  
54  
55  
56  
57  
58  
59  
60

## Conclusion

Our study suggests non-withdrawal of beta-blocker therapy during acute heart failure reduces short-term mortality risk in patients with acute decompensated chronic and de-novo heart failure; findings that could only be validated in randomized controlled trials designed to show the superiority of non-withdrawal of beta-blockade therapy and also determine whether beta-blocker dose should be reduced or kept unchanged compared to a withdrawal strategy.

For peer review only



## References:

1. Effect of metoprolol CR/XL in chronic heart failure: Metoprolol CR/XL Randomised Intervention Trial in Congestive Heart Failure (MERIT-HF). *Lancet* 1999;353(9169):2001-7.
2. The Cardiac Insufficiency Bisoprolol Study II (CIBIS-II): a randomised trial. *The Lancet* 1999;353(9146):9-13. doi: 10.1016/s0140-6736(98)11181-9
3. Krum H, Roecker EB, Mohacsi P, et al. Effects of initiating carvedilol in patients with severe chronic heart failure: results from the COPERNICUS Study. *JAMA* 2003;289(6):712-8.
4. Packer M, Bristow MR, Cohn JN, et al. The effect of carvedilol on morbidity and mortality in patients with chronic heart failure. U.S. Carvedilol Heart Failure Study Group. *N Engl J Med* 1996;334(21):1349-55. doi: 10.1056/NEJM199605233342101
5. Yancy CW, Jessup M, Bozkurt B, et al. 2013 ACCF/AHA guideline for the management of heart failure: executive summary: a report of the American College of Cardiology Foundation/American Heart Association Task Force on practice guidelines. *Circulation* 2013;128(16):1810-52. doi: 10.1161/CIR.0b013e31829e8807
6. Foody JM, Farrell MH, Krumholz HM. beta-Blocker therapy in heart failure: scientific review. *JAMA* 2002;287(7):883-9.
7. Nieminen MS, Brutsaert D, Dickstein K, et al. EuroHeart Failure Survey II (EHFS II): a survey on hospitalized acute heart failure patients: description of population. *Eur Heart J* 2006;27(22):2725-36. doi: 10.1093/eurheartj/ehl193
8. Harjola VP, Follath F, Nieminen MS, et al. Characteristics, outcomes, and predictors of mortality at 3 months and 1 year in patients hospitalized for acute heart failure. *Eur J Heart Fail* 2010;12(3):239-48. doi: 10.1093/eurjhf/hfq002
9. Jondeau G, Neuder Y, Eicher JC, et al. B-CONVINCED: Beta-blocker CONTinuation Vs. INTerruption in patients with Congestive heart failure hospitalized for a decompensation episode. *Eur Heart J* 2009;30(18):2186-92. doi: 10.1093/eurheartj/ehp323
10. Bohm M, Link A, Cai D, et al. Beneficial association of beta-blocker therapy on recovery from severe acute heart failure treatment: data from the Survival of Patients With Acute Heart Failure in Need of Intravenous Inotropic Support trial. *Crit Care Med* 2011;39(5):940-4. doi: 10.1097/CCM.0b013e31820a91ed
11. Sulaiman K, Panduranga P, Al-Zakwani I, et al. Clinical characteristics, management, and outcomes of acute heart failure patients: observations from the Gulf acute heart failure registry (Gulf CARE). *Eur J Heart Fail* 2015;17(4):374-84. doi: 10.1002/ejhf.245
12. Sulaiman KJ, Panduranga P, Al-Zakwani I, et al. Rationale, Design, Methodology and Hospital Characteristics of the First Gulf Acute Heart Failure Registry (Gulf CARE). *Heart Views* 2014;15(1):6-12. doi: 10.4103/1995-705X.132137
13. Butler J, Young JB, Abraham WT, et al. Beta-blocker use and outcomes among hospitalized heart failure patients. *J Am Coll Cardiol* 2006;47(12):2462-9. doi: 10.1016/j.jacc.2006.03.030
14. Cuffe MS, Califf RM, Adams KF, Jr., et al. Short-term intravenous milrinone for acute exacerbation of chronic heart failure: a randomized controlled trial. *JAMA* 2002;287(12):1541-7.
15. Gattis WA, O'Connor CM, Leimberger JD, et al. Clinical outcomes in patients on beta-blocker therapy admitted with worsening chronic heart failure. *Am J Cardiol* 2003;91(2):169-74.
16. Orso F, Baldasseroni S, Fabbri G, et al. Role of beta-blockers in patients admitted for worsening heart failure in a real world setting: data from the Italian Survey on Acute Heart Failure. *Eur J Heart Fail* 2009;11(1):77-84. doi: 10.1093/eurjhf/hfn008
17. Fonarow GC, Abraham WT, Albert NM, et al. Influence of beta-blocker continuation or withdrawal on outcomes in patients hospitalized with heart failure: findings from the OPTIMIZE-HF program. *J Am Coll Cardiol* 2008;52(3):190-9. doi: 10.1016/j.jacc.2008.03.048
18. Prins KW, Neill JM, Tyler JO, et al. Effects of Beta-Blocker Withdrawal in Acute Decompensated Heart Failure: A Systematic Review and Meta-Analysis. *JACC Heart Fail* 2015;3(8):647-53. doi: 10.1016/j.jchf.2015.03.008
19. Lohse MJ, Engelhardt S, Eschenhagen T. What is the role of beta-adrenergic signaling in heart failure? *Circ Res* 2003;93(10):896-906. doi: 10.1161/01.RES.0000102042.83024.CA
20. Onwuanyi A, Taylor M. Acute decompensated heart failure: pathophysiology and treatment. *Am J Cardiol* 2007;99(6B):25D-30D. doi: 10.1016/j.amjcard.2006.12.017
21. Gattis WA, O'Connor CM, Gallup DS, et al. Predischarge initiation of carvedilol in patients hospitalized for decompensated heart failure: results of the Initiation Management Predischarge: Process for Assessment

- 1  
2  
3 of Carvedilol Therapy in Heart Failure (IMPACT-HF) trial. *J Am Coll Cardiol* 2004;43(9):1534-41. doi:  
4 10.1016/j.jacc.2003.12.040
- 5 22. McMurray JJ, Adamopoulos S, Anker SD, et al. ESC guidelines for the diagnosis and treatment of acute and  
6 chronic heart failure 2012: The Task Force for the Diagnosis and Treatment of Acute and Chronic Heart  
7 Failure 2012 of the European Society of Cardiology. Developed in collaboration with the Heart Failure  
8 Association (HFA) of the ESC. *Eur J Heart Fail* 2012;14(8):803-69. doi: 10.1093/eurjhf/hfs105
- 9 23. Writing Committee M, Yancy CW, Jessup M, et al. 2013 ACCF/AHA guideline for the management of heart  
10 failure: a report of the American College of Cardiology Foundation/American Heart Association Task  
11 Force on practice guidelines. *Circulation* 2013;128(16):e240-327. doi: 10.1161/CIR.0b013e31829e8776
- 12 24. Granger CB, McMurray JJ, Yusuf S, et al. Effects of candesartan in patients with chronic heart failure and  
13 reduced left-ventricular systolic function intolerant to angiotensin-converting-enzyme inhibitors: the  
14 CHARM-Alternative trial. *Lancet* 2003;362(9386):772-6. doi: 10.1016/S0140-6736(03)14284-5
- 15 25. Effect of enalapril on survival in patients with reduced left ventricular ejection fractions and congestive heart  
16 failure. The SOLVD Investigators. *N Engl J Med* 1991;325(5):293-302. doi:  
17 10.1056/NEJM199108013250501
- 18 26. Taylor AL, Ziesche S, Yancy C, et al. Combination of isosorbide dinitrate and hydralazine in blacks with heart  
19 failure. *N Engl J Med* 2004;351(20):2049-57. doi: 10.1056/NEJMoa042934
- 20  
21  
22  
23  
24  
25  
26  
27  
28  
29  
30  
31  
32  
33  
34  
35  
36  
37  
38  
39  
40  
41  
42  
43  
44  
45  
46  
47  
48  
49  
50  
51  
52  
53  
54  
55  
56  
57  
58  
59  
60

## Footnotes

Contribution: KS, KFA, NA, AA-A, MA-J, BB, WA, MR, NB, HA, AA-M, HAF, AE, PP and JAS were involved in the design of the Gulf CARE registry and patient enrolment and ensuring quality control of the study. CAK designed the analysis and wrote the manuscript. ZM and RS carried out the statistical analyses. All authors approved the final version of the manuscript.

Funding: Gulf CARE is an investigator-initiated study conducted under the auspices of the Gulf Heart Association and funded by Servier, Paris, France; and (for centres in Saudi Arabia) by the Saudi Heart Association. Dr Abi Khalil's lab is funded by the biomedical research program (BMRP) at Weill Cornell Medicine-Qatar, a program funded by Qatar Foundation, and by 2 grants from the Qatar National Research Funds under its National Priorities Research Programs award numbers (NPRP 7 - 701 - 3 - 192 and NPRP 9-169-3-024). Dr Al-Habib's lab is funded by the Saudi Heart Association and The Deanship of Scientific Research at King Saud University, Riyadh, Saudi Arabia (Research group number: RG -1436-013). All of the above-mentioned sources did not have a role in the study's concept, analysis and writing of the manuscript.

Acknowledgment: We would like to acknowledge Andrew Bliszczyk for editorial assistance.

Competing interests: None.

Data sharing statement: No additional data are available.

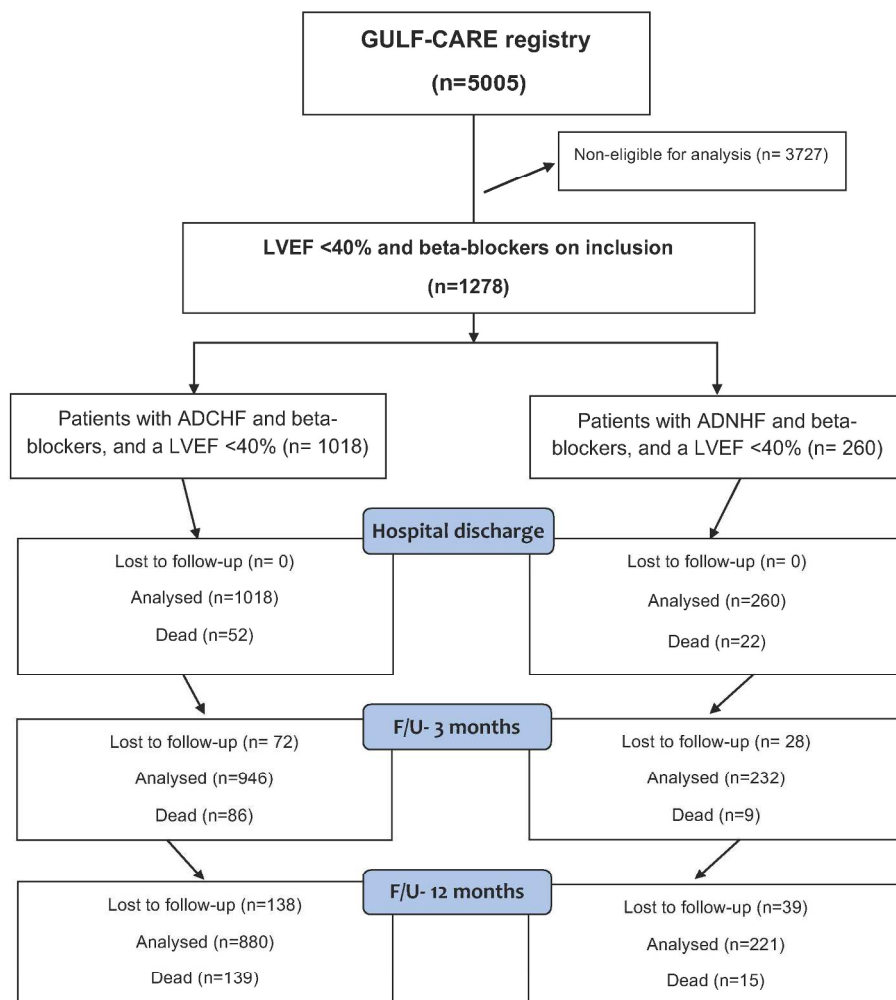

Figure 1: Flow chart of the current prospective analysis. 1278 patients with a LVEF <40% and beta-blockers on admission were analyzed from the 5005 participants in the GULF-CARE registry. ADCHF = Acute decompensated chronic heart failure, ADNHF = Acute de-novo heart failure, LVEF = Left ventricular ejection fraction, F/U= Follow-up.

211x230mm (300 x 300 DPI)

**Supplementary table 1:** Baseline characteristics of patients with acute decompensated chronic heart failure and a left ventricular ejection fraction <40%, on beta-blockers on admission

|                                            | Patients with ADCHF with a LVEF <40% and beta-blockers on admission<br>N=1018 | Beta-blockers maintained during hospitalization<br>N=926 | Beta-blockers withdrawn during hospitalization<br>N=92 | p value |
|--------------------------------------------|-------------------------------------------------------------------------------|----------------------------------------------------------|--------------------------------------------------------|---------|
| Age (years)                                | 61.0±13.9                                                                     | 61.1±13.7                                                | 60.3±15.8                                              | 0.64    |
| Male gender                                | 751(73.8%)                                                                    | 689(74.4%)                                               | 62(67.4%)                                              | 0.14    |
| BMI (kg/m <sup>2</sup> )                   | 27.7±5.8                                                                      | 27.6±5.8                                                 | 28.3±5.7                                               | 0.28    |
| Hypertension                               | 673(66.1%)                                                                    | 620(67.0%)                                               | 53(57.6%)                                              | 0.07    |
| Diabetes Mellitus                          | 569(55.9%)                                                                    | 518(55.9%)                                               | 51(55.4%)                                              | 0.92    |
| Hyperlipidemia                             | 464(45.6%)                                                                    | 419(45.2%)                                               | 45(48.9%)                                              | 0.50    |
| Smoking                                    | 162(15.9%)                                                                    | 149(16.1%)                                               | 13(14.1%)                                              | 0.62    |
| <b>Race</b>                                |                                                                               |                                                          |                                                        |         |
| Arabs                                      | 937 (92.0%)                                                                   | 852(92.0%)                                               | 85(92.4%)                                              | 0.37    |
| Asians                                     | 77(7.6%)                                                                      | 71(7.7%)                                                 | 6(6.5%)                                                |         |
| Others                                     | 4(0.4%)                                                                       | 3(0.3%)                                                  | 1(1.1%)                                                |         |
| <b>Past – medical history</b>              |                                                                               |                                                          |                                                        |         |
| Known CAD                                  | 676(66.4%)                                                                    | 617(66.6%)                                               | 59(64.1%)                                              | 0.62    |
| Stroke /TIAs                               | 96(9.4%)                                                                      | 89(9.6%)                                                 | 7(7.6%)                                                | 0.53    |
| Valvular heart disease                     | 154(15.1%)                                                                    | 139(15.0%)                                               | 15(16.3%)                                              | 0.74    |
| Atrial fibrillation                        | 170(16.7%)                                                                    | 157(17.0%)                                               | 13(14.1%)                                              | 0.48    |
| CKD                                        | 215(21.1%)                                                                    | 192(20.7%)                                               | 23(25.0%)                                              | 0.33    |
| <b>Etiology</b>                            |                                                                               |                                                          |                                                        |         |
| Non-Compliance Medication                  | 300(29.5%)                                                                    | 281(30.3%)                                               | 19(20.7%)                                              | 0.052   |
| IHD                                        | 204(20,0%)                                                                    | 184(19.9%)                                               | 20(21.7%)                                              | 0.66    |
| HTN                                        | 46(4.5%)                                                                      | 44(4.8%)                                                 | 2(2.2%)                                                | 0.42    |
| Arrhythmia                                 | 61(6.0%)                                                                      | 57(6.2%)                                                 | 4(4.3%)                                                | 0.48    |
| Anemia                                     | 23(2.3%)                                                                      | 20(2.2%)                                                 | 3(3.3%)                                                | 0.45    |
| Renal failure                              | 58(5.7%)                                                                      | 50(5.4%)                                                 | 8(8.7%)                                                | 0.19    |
| <b>Clinical and biochemical parameters</b> |                                                                               |                                                          |                                                        |         |

|                                     |             |             |             |         |
|-------------------------------------|-------------|-------------|-------------|---------|
| HR, b.p.m                           | 94.4±22.4   | 94.8±22.5   | 91.1±21.2   | 0.14    |
| SBP, mmHg                           | 126.6±30.6  | 127.8±30.3  | 114.2±31.3  | <0.001  |
| DBP, mmHg                           | 76.4±17.9   | 77.2±17.8   | 67.8±17.2   | <0.001  |
| LVEF (%)                            | 26.6±7.1    | 26.7±7.1    | 25.6±7.6    | 0.16    |
| BNP, pg/mL                          | 6847±9679   | 6851±9831   | 6777±7271   | 0.97    |
| Creatinin, mmol/L                   | 137.7±116.3 | 135.7±113.4 | 158.5±141.4 | 0.07    |
| <b>Medications</b>                  |             |             |             |         |
| Carvedilol                          | 649(63.8%)  | 589 (63.6%) | 60(65.2%)   | 0.75    |
| Bisoprolol                          | 286 (28.1%) | 265(28.6%)  | 21(22.8%)   | 0.23    |
| Metoprolol                          | 64 (6.3%)   | 57(6.2%)    | 7(7.6%)     | 0.58    |
| Atenolol                            | 19 (1.9%)   | 15(1.6%)    | 4(4.3%)     | 0.08    |
| ACE-inhibitors                      | 652(64.0%)  | 600(64.8%)  | 52(56.5%)   | 0.11    |
| ARBs                                | 180(17.7%)  | 167 (18.0%) | 13(14.1%)   | 0.34    |
| Statins                             | 751 (73.8%) | 694(74.9%)  | 57(62.0%)   | 0.007   |
| Aspirin                             | 832 (81.7%) | 768(82.9%)  | 64(69.6%)   | 0.002   |
| VKA                                 | 221(21.7%)  | 196 (21.2%) | 25(27.2%)   | 0.18    |
| Ibravadine                          | 48(4.7%)    | 42 (4.5%)   | 6(6.5%)     | 0.43    |
| Aldosterone antagonists             | 419(41.2%)  | 383 (41.4%) | 36 (39.1%)  | 0.67    |
| Clopidogrel                         | 301(29.6%)  | 274 (29.6%) | 27(29.3%)   | 0.96    |
| Diuretics                           | 920(90.4%)  | 835(90.2%)  | 85(92.4%)   | 0.49    |
| Inotrops use during hospitalization | 156 (15.3%) | 110 (11.9%) | 46 (50.0%)  | <0.001* |

All values are given as n (%) or mean ±SD. ADCHF = Acute decompensated chronic heart failure, BMI=body mass index, CAD= coronary artery disease, TIAs=transient ischemic attacks, CKD=chronic kidney disease, HR=heart rate, SBP= systolic blood pressure, DBP= diastolic blood pressure, LVEF = Left ventricular ejection fraction, VKA= Vitamin K antagonists, ARBs= Angiotensin receptor blockers.

**Supplementary table 2:** Baseline characteristics of patients with acute de-novo heart failure and a left ventricular ejection fraction <40%, on beta-Blockers on admission.

|                                 | Patients with ADCHF with a LVEF <40% and beta-blockers on admission<br>N=260 | Beta-blockers maintained during hospitalization<br>N=224 | Beta-blockers withdrawn during hospitalization<br>N=36 | p    |
|---------------------------------|------------------------------------------------------------------------------|----------------------------------------------------------|--------------------------------------------------------|------|
| Age (years)                     | 59.8±13.8                                                                    | 60.1±13.8                                                | 57.9±13.9                                              | 0.35 |
| Male gender                     | 177(68.1%)                                                                   | 151(67.4%)                                               | 26(72.2%)                                              | 0.56 |
| BMI (kg/m <sup>2</sup> )        | 28.1±5.7                                                                     | 28.1±5.8                                                 | 28.1±5.2                                               | 0.99 |
| Hypertension                    | 181(69.6%)                                                                   | 158(70.5%)                                               | 23(63.9%)                                              | 0.42 |
| Diabetes Mellitus               | 147(56.5%)                                                                   | 123(54.9%)                                               | 24(66.7%)                                              | 0.18 |
| Hyperlipidemia                  | 106(40.8%)                                                                   | 92(41.1%)                                                | 14(38.9%)                                              | 0.80 |
| Smoking                         | 67 (25.8%)                                                                   | 60(26.8%)                                                | 7(19.4%)                                               | 0.35 |
| <b>Race</b>                     |                                                                              |                                                          |                                                        |      |
| Arabs                           | 232(89.2%)                                                                   | 201 (89.7%)                                              | 31(86.1%)                                              | 0.56 |
| Asians                          | 28(10.8%)                                                                    | 23(10.3%)                                                | 5(13.9%)                                               |      |
| Others                          | -                                                                            | -                                                        | -                                                      |      |
| <b>Past – medical history</b>   |                                                                              |                                                          |                                                        |      |
| Known CAD                       | 150(57.7%)                                                                   | 130(58.0%)                                               | 20(55.6%)                                              | 0.78 |
| Stroke /TIAs                    | 29(11.2%)                                                                    | 24(10.7%)                                                | 5(13.9%)                                               | 0.57 |
| Valvular heart disease          | 19(7.3%)                                                                     | 16(7.1%)                                                 | 3 (8.3%)                                               | 0.73 |
| Atrial fibrillation             | 23(8.8 %)                                                                    | 19(8.5%)                                                 | 4(11.1%)                                               | 0.53 |
| CKD                             | 28(10.8%)                                                                    | 22(9.8%)                                                 | 6 (16.7%)                                              | 0.24 |
| <b>Etiology</b>                 |                                                                              |                                                          |                                                        |      |
| Non-Compliance Medication       | 40(15.4%)                                                                    | 37(16.5%)                                                | 3(8.3%)                                                | 0.20 |
| IHD                             | 117(45.0%)                                                                   | 100(44.6%)                                               | 17(47.2%)                                              | 0.77 |
| HTN                             | 12(4.6%)                                                                     | 11(4.9%)                                                 | 1(2.8%)                                                | 0.99 |
| Arrhythmia                      | 11(4.2%)                                                                     | 8(3.6%)                                                  | 3(8.3%)                                                | 0.18 |
| Anemia                          | 5(1.9%)                                                                      | 5(2.2%)                                                  | 0(0.0%)                                                | 0.99 |
| Renal failure                   | 9(3.5%)                                                                      | 8(3.6%)                                                  | 1(2.8%)                                                | 0.99 |
| <b>Clinical and biochemical</b> |                                                                              |                                                          |                                                        |      |

| parameters                          |             |             |             |        |
|-------------------------------------|-------------|-------------|-------------|--------|
| HR, b.p.m                           | 94.6±22.3   | 94.6±21.2   | 94.7±28.7   | 0.99   |
| SBP, mmHg                           | 133.6±32.4  | 134.6±31.9  | 126.8±35.0  | 0.19   |
| DBP, mmHg                           | 80.5±19.3   | 81.0±18.8   | 77.6±22.4   | 0.34   |
| LVEF (%)                            | 28.8±7.2    | 29.0±7.2    | 27.5±7.4    | 0.23   |
| BNP, pg/mL                          | 5227±4924   | 5361±5046   | 3883±1614   | 0.52   |
| Creatinin, mmol/L                   | 128.5±121.9 | 124.9±123.5 | 151.1±110.2 | 0.23   |
| <b>Medications</b>                  |             |             |             |        |
| Carvedilol                          | 100 (38.5%) | 84(37.5%)   | 16(44.4%)   | 0.42   |
| Bisoprolol                          | 90 (34.6%)  | 82(36.6%)   | 8(22.2%)    | 0.09   |
| Metoprolol                          | 35 (13.5%)  | 25 (11.2%)  | 10(27.8%)   | 0.01   |
| Atenolol                            | 35 (13.5%)  | 33 (14.7%)  | 2(5.6%)     | 0.18   |
| ACE-inhibitors                      | 166(63.8%)  | 150(67.0%)  | 16(44.4%)   | 0.009  |
| ARBs                                | 23(8.8%)    | 18(8.0%)    | 5(13.9%)    | 0.33   |
| Statins                             | 180(69.2%)  | 154(68.8%)  | 26(72.2%)   | 0.67   |
| Aspirin                             | 204(78.5%)  | 176(78.6%)  | 28(77.8%)   | 0.91   |
| VKA                                 | 19(7.3%)    | 16(7.1%)    | 3(8.3%)     | 0.73   |
| Ibravadine                          | 7(2.7%)     | 7(3.1%)     | 0(0.0%)     | 0.59   |
| Aldosterone antagonists             | 45(17.3%)   | 38(17.0%)   | 7(19.4%)    | 0.71   |
| Clopidogrel                         | 81(31.2%)   | 69(30.8%)   | 12(33.3%)   | 0.76   |
| Diuretics                           | 113(43.5%)  | 98(43.8%)   | 15(41.7%)   | 0.81   |
| Inotrops use during hospitalization | 51 (19.6%)  | 32 (14.3%)  | 19 (52.8%)  | <0.001 |

All values are given as n (%) or mean ±SD. ADNHF = Acute de-novo heart failure, BMI=body mass index, CAD= coronary artery disease, TIAs=transient ischemic attacks, CKD=chronic kidney disease, HR=heart rate, SBP= systolic blood pressure, DBP= diastolic blood pressure, LVEF = Left ventricular ejection fraction, VKA= Vitamin K antagonists, ARBs= Angiotensin receptor blockers.



**Supplementary table 3:** Variables after propensity score matching on inotrops in patients with acute decompensated chronic heart failure, a left ventricular ejection fraction <40% and on beta-blockers on admission.

|                               | Beta-blockers continued<br>N=92 | Beta-blockers withdrawn<br>N=92 | p value |
|-------------------------------|---------------------------------|---------------------------------|---------|
| Age (years)                   | 60.3±12.7                       | 60.3±15.8                       | 0.98    |
| Male gender                   | 74 (80.4%)                      | 62(67.4%)                       | 0.044*  |
| Noncompliance with medication | 51 (55.4%)                      | 19 (20.7%)                      | <0.001* |
| SBP, mmHg                     | 147.5±39.8                      | 114.2±31.3                      | <0.001* |
| DBP, mmHg                     | 95.9±23.4                       | 67.8±17.2                       | <0.001* |
| LVEF (%)                      | 28.3±6.7                        | 25.6±7.6                        | 0.011*  |
| Creatinin, mmol/L             | 126.7±103.4                     | 158.5±141.4                     | 0.08    |
| Statins                       | 79 (85.9%)                      | 57(62.0%)                       | <0.001* |
| Aspirin                       | 92 (100.0%)                     | 64(69.6%)                       | <0.001* |
| Inotrops                      | 46 (50.0%)                      | 46 (50.0%)                      | 1.000   |

All values are given as n (%) or mean ±SD. SBP= systolic blood pressure, DBP= diastolic blood pressure, LVEF = Left ventricular ejection fraction.

1  
2  
3  
4  
5  
6  
7  
8  
9  
10  
11  
12  
13  
14  
15  
16  
17  
18  
19  
20  
21  
22  
23  
24  
25  
26  
27  
28  
29  
30  
31  
32  
33  
34  
35  
36  
37  
38  
39  
40  
41  
42  
43  
44  
45  
46  
47  
48  
49  
50  
51  
52  
53  
54  
55  
56  
57  
58  
59  
60

**Supplementary table 4:** Variables after propensity score matching on inotropes in patients with acute de-novo heart failure, a left ventricular ejection fraction LVEF <40% and on beta-blockers on admission.

|                | <b>Beta-blockers continued<br/>N=36</b> | <b>Beta-blockers withdrawn<br/>n=36</b> | <b>p value</b> |
|----------------|-----------------------------------------|-----------------------------------------|----------------|
| Age            | 59.9±12.7                               | 57.9±13.9                               | 0.514          |
| Gender         | 11 (30.6%)                              | 10 (27.8%)                              | 0.795          |
| ACE-inhibitors | 25 (69.4%)                              | 16 (44.4%)                              | 0.032*         |
| Inotropes      | 19 (52.8%)                              | 19 (52.8%)                              | 1.000          |

All values are given as n (%) or mean ±SD.

For peer review only

## STROBE Statement—checklist of items that should be included in reports of observational studies

|                              | Item No | Recommendation                                                                                                                                                                                                                                                                                                                                                                                                                                                                                                                                                                                                                                                                                                                                                                |
|------------------------------|---------|-------------------------------------------------------------------------------------------------------------------------------------------------------------------------------------------------------------------------------------------------------------------------------------------------------------------------------------------------------------------------------------------------------------------------------------------------------------------------------------------------------------------------------------------------------------------------------------------------------------------------------------------------------------------------------------------------------------------------------------------------------------------------------|
| <b>Title and abstract</b>    | 1       | (a) Indicate the study's design with a commonly used term in the title or the abstract- done page 2<br>(b) Provide in the abstract an informative and balanced summary of what was done and what was found- done page 2                                                                                                                                                                                                                                                                                                                                                                                                                                                                                                                                                       |
| <b>Introduction</b>          |         |                                                                                                                                                                                                                                                                                                                                                                                                                                                                                                                                                                                                                                                                                                                                                                               |
| Background/rationale         | 2       | Explain the scientific background and rationale for the investigation being reported- done page 4                                                                                                                                                                                                                                                                                                                                                                                                                                                                                                                                                                                                                                                                             |
| Objectives                   | 3       | State specific objectives, including any prespecified hypotheses- done page 4                                                                                                                                                                                                                                                                                                                                                                                                                                                                                                                                                                                                                                                                                                 |
| <b>Methods</b>               |         |                                                                                                                                                                                                                                                                                                                                                                                                                                                                                                                                                                                                                                                                                                                                                                               |
| Study design                 | 4       | Present key elements of study design early in the paper- done page 5                                                                                                                                                                                                                                                                                                                                                                                                                                                                                                                                                                                                                                                                                                          |
| Setting                      | 5       | Describe the setting, locations, and relevant dates, including periods of recruitment, exposure, follow-up, and data collection- done page 5                                                                                                                                                                                                                                                                                                                                                                                                                                                                                                                                                                                                                                  |
| Participants                 | 6       | (a) <i>Cohort study</i> —Give the eligibility criteria, and the sources and methods of selection of participants. Describe methods of follow-up- done page 5<br><i>Case-control study</i> —Give the eligibility criteria, and the sources and methods of case ascertainment and control selection. Give the rationale for the choice of cases and controls- not applicable<br><i>Cross-sectional study</i> —Give the eligibility criteria, and the sources and methods of selection of participants. not applicable<br>(b) <i>Cohort study</i> —For matched studies, give matching criteria and number of exposed and unexposed, not applicable<br><i>Case-control study</i> —For matched studies, give matching criteria and the number of controls per case- not applicable |
| Variables                    | 7       | Clearly define all outcomes, exposures, predictors, potential confounders, and effect modifiers. Give diagnostic criteria, if applicable- done page 5                                                                                                                                                                                                                                                                                                                                                                                                                                                                                                                                                                                                                         |
| Data sources/<br>measurement | 8*      | For each variable of interest, give sources of data and details of methods of assessment (measurement). Describe comparability of assessment methods if there is more than one group- done page 5                                                                                                                                                                                                                                                                                                                                                                                                                                                                                                                                                                             |
| Bias                         | 9       | Describe any efforts to address potential sources of bias- done page 6                                                                                                                                                                                                                                                                                                                                                                                                                                                                                                                                                                                                                                                                                                        |
| Study size                   | 10      | Explain how the study size was arrived at- done page 5 to 6                                                                                                                                                                                                                                                                                                                                                                                                                                                                                                                                                                                                                                                                                                                   |
| Quantitative variables       | 11      | Explain how quantitative variables were handled in the analyses. If applicable, describe which groupings were chosen and why- done page 6                                                                                                                                                                                                                                                                                                                                                                                                                                                                                                                                                                                                                                     |
| Statistical methods          | 12      | (a) Describe all statistical methods, including those used to control for confounding- done page 6<br>(b) Describe any methods used to examine subgroups and interactions- done page 6<br>(c) Explain how missing data were addressed- done page 6<br>(d) <i>Cohort study</i> —If applicable, explain how loss to follow-up was addressed- done page 7<br><i>Case-control study</i> —If applicable, explain how matching of cases and controls was addressed not applicable<br><i>Cross-sectional study</i> —If applicable, describe analytical methods taking account of sampling strategy not applicable<br>(e) Describe any sensitivity analyses- done page 6                                                                                                              |

**Results**

|                          |     |                                                                                                                                                                                                                                |
|--------------------------|-----|--------------------------------------------------------------------------------------------------------------------------------------------------------------------------------------------------------------------------------|
| Participants             | 13* | (a) Report numbers of individuals at each stage of study—eg numbers potentially eligible, examined for eligibility, confirmed eligible, included in the study, completing follow-up, and analysed- page 6                      |
|                          |     | (b) Give reasons for non-participation at each stage- page 6-7                                                                                                                                                                 |
|                          |     | (c) Consider use of a flow diagram- not applicable                                                                                                                                                                             |
| Descriptive data         | 14* | (a) Give characteristics of study participants (eg demographic, clinical, social) and information on exposures and potential confounders- done page 6-7 and table 1                                                            |
|                          |     | (b) Indicate number of participants with missing data for each variable of interest- done page 6-7                                                                                                                             |
|                          |     | (c) <i>Cohort study</i> —Summarise follow-up time (eg, average and total amount)- done page 7-8                                                                                                                                |
| Outcome data             | 15* | <i>Cohort study</i> —Report numbers of outcome events or summary measures over time- done table 2 and 4                                                                                                                        |
|                          |     | <i>Case-control study</i> —Report numbers in each exposure category, or summary measures of exposure-not applicable.                                                                                                           |
|                          |     | <i>Cross-sectional study</i> —Report numbers of outcome events or summary measures-not applicable                                                                                                                              |
| Main results             | 16  | (a) Give unadjusted estimates and, if applicable, confounder-adjusted estimates and their precision (eg, 95% confidence interval). Make clear which confounders were adjusted for and why they were included- done page 6 to 8 |
|                          |     | (b) Report category boundaries when continuous variables were categorized- done page 6 to 8                                                                                                                                    |
|                          |     | (c) If relevant, consider translating estimates of relative risk into absolute risk for a meaningful time period. Not applicable                                                                                               |
| Other analyses           | 17  | Report other analyses done—eg analyses of subgroups and interactions, and sensitivity analyses- done page 7-8                                                                                                                  |
| <b>Discussion</b>        |     |                                                                                                                                                                                                                                |
| Key results              | 18  | Summarise key results with reference to study objectives- done page 8                                                                                                                                                          |
| Limitations              | 19  | Discuss limitations of the study, taking into account sources of potential bias or imprecision. Discuss both direction and magnitude of any potential bias - done page 10.                                                     |
| Interpretation           | 20  | Give a cautious overall interpretation of results considering objectives, limitations, multiplicity of analyses, results from similar studies, and other relevant evidence- done pages from 8 to 10                            |
| Generalisability         | 21  | Discuss the generalisability (external validity) of the study results- done page 10                                                                                                                                            |
| <b>Other information</b> |     |                                                                                                                                                                                                                                |
| Funding                  | 22  | Give the source of funding and the role of the funders for the present study and, if applicable, for the original study on which the present article is based- done page 13.                                                   |

\*Give information separately for cases and controls in case-control studies and, if applicable, for exposed and unexposed groups in cohort and cross-sectional studies.

**Note:** An Explanation and Elaboration article discusses each checklist item and gives methodological background and published examples of transparent reporting. The STROBE checklist is best used in conjunction with this article (freely available on the Web sites of PLoS Medicine at <http://www.plosmedicine.org/>, Annals of Internal Medicine at <http://www.annals.org/>, and Epidemiology at <http://www.epidem.com/>). Information on the STROBE Initiative is available at [www.strobe-statement.org](http://www.strobe-statement.org).

# BMJ Open

## Non-withdrawal of beta-blockers in acute decompensated chronic and de-novo heart failure with reduced ejection fraction in a prospective multicenter study of patients with acute heart failure in the Middle East



|                                 |                                                                                                                                                                                                                                                                                                                                                                                                                                                                                                                                                                                                                                                                                                                                                                                                                                                                                                                                                                                                                                                 |
|---------------------------------|-------------------------------------------------------------------------------------------------------------------------------------------------------------------------------------------------------------------------------------------------------------------------------------------------------------------------------------------------------------------------------------------------------------------------------------------------------------------------------------------------------------------------------------------------------------------------------------------------------------------------------------------------------------------------------------------------------------------------------------------------------------------------------------------------------------------------------------------------------------------------------------------------------------------------------------------------------------------------------------------------------------------------------------------------|
| Journal:                        | <i>BMJ Open</i>                                                                                                                                                                                                                                                                                                                                                                                                                                                                                                                                                                                                                                                                                                                                                                                                                                                                                                                                                                                                                                 |
| Manuscript ID                   | bmjopen-2016-014915.R3                                                                                                                                                                                                                                                                                                                                                                                                                                                                                                                                                                                                                                                                                                                                                                                                                                                                                                                                                                                                                          |
| Article Type:                   | Research                                                                                                                                                                                                                                                                                                                                                                                                                                                                                                                                                                                                                                                                                                                                                                                                                                                                                                                                                                                                                                        |
| Date Submitted by the Author:   | 17-May-2017                                                                                                                                                                                                                                                                                                                                                                                                                                                                                                                                                                                                                                                                                                                                                                                                                                                                                                                                                                                                                                     |
| Complete List of Authors:       | <p>Abi Khalil, Charbel<br/>           Suliman, Kadhim<br/>           Mahfoud, Ziyad<br/>           Singh, Rajvir; Hamad Medical Corporation (HMC), Cardiology and Cardiothoracic Research Centre, Department of Cardiology and Cardiovascular Surgery,<br/>           Asaad, Nidal; Hamad Medical Corporation (HMC), Cardiology and Cardiothoracic Research Centre, Department of Cardiology and Cardiovascular Surgery,<br/>           AlHabib, Khalid ; King Saud University<br/>           Alsheikh-Ali, Alawi<br/>           Al-Jarallah, Mohammed<br/>           Bulbanat, Bassam<br/>           Al Mahmeed, Wael; Heart and Vascular Institute Cleveland Clinic<br/>           Ridha, Mustafa<br/>           Bazargani, Nooshin<br/>           Amin, Haitham; MKCC, Cardiology<br/>           Al-Motarreb, Ahmed; Sana University, Medicine<br/>           AlFaleh, Husam; King Saud University,<br/>           Elasar, Abdelfatah<br/>           Panduranga, Prashanth<br/>           Al Suwaidi, Jassim; Hamad Medical Corporation,</p> |
| <b>Primary Subject Heading</b>: | Cardiovascular medicine                                                                                                                                                                                                                                                                                                                                                                                                                                                                                                                                                                                                                                                                                                                                                                                                                                                                                                                                                                                                                         |
| Secondary Subject Heading:      | Epidemiology                                                                                                                                                                                                                                                                                                                                                                                                                                                                                                                                                                                                                                                                                                                                                                                                                                                                                                                                                                                                                                    |
| Keywords:                       | Heart failure < CARDIOLOGY, Adult cardiology < CARDIOLOGY, Cardiac Epidemiology < CARDIOLOGY                                                                                                                                                                                                                                                                                                                                                                                                                                                                                                                                                                                                                                                                                                                                                                                                                                                                                                                                                    |
|                                 |                                                                                                                                                                                                                                                                                                                                                                                                                                                                                                                                                                                                                                                                                                                                                                                                                                                                                                                                                                                                                                                 |

SCHOLARONE™  
Manuscripts

1  
2  
3  
4  
5  
6  
7  
8  
9  
10  
11  
12  
13  
14  
15  
16  
17  
18  
19  
20  
21  
22  
23  
24  
25  
26  
27  
28  
29  
30  
31  
32  
33  
34  
35  
36  
37  
38  
39  
40  
41  
42  
43  
44  
45  
46  
47  
48  
49  
50  
51  
52  
53  
54  
55

## Non-withdrawal of beta-blockers in acute decompensated chronic and de-novo heart failure with reduced ejection fraction in a prospective multicenter study of patients with acute heart failure in the Middle East.

Charbel Abi Khalil, MD, PhD <sup>1,2,3</sup> \*; Kadhim Sulaiman, MD <sup>4</sup>; Ziyad Mahfoud, PhD <sup>5</sup>; Rajvir Singh, PhD <sup>3</sup>; Nidal Asaad, MBBS <sup>3</sup>; Khalid F AlHabib, MD <sup>6</sup>; Alawi Alsheikh-Ali, MD, MSc <sup>7</sup>; Mohammed Al-Jarallah MBChB <sup>8</sup>; Bassam Bulbanat, MBChB <sup>9</sup>; Wael AlMahmeed, MD <sup>10</sup>; Mustafa Ridha MD <sup>11</sup>; Nooshin Bazargani, MD <sup>12</sup>; Haitham Amin, MD <sup>13</sup>; Ahmed Al-Motarreb, MD <sup>14</sup>; Husam Al Faleh, MD <sup>6</sup>; Abdelfatah Elasar, MD, PhD <sup>15</sup>; Prashanth Panduranga, MBBS, MD <sup>4</sup>; Jassim Al Suwaidi, MBChB <sup>3</sup>, on behalf of the GULF-CARE group.

1- Department of Medicine. Weill Cornell Medicine-Qatar.

2- Department of Genetic Medicine. Weill Cornell Medicine-Qatar.

3- Adult Cardiology, Heart Hospital, Hamad Medical Corporation, Doha, Qatar.

5- Division of Global and Public Health. Weill Cornell Medicine-Qatar

5-National Heart Center, Royal Hospital, Muscat, Oman.

6- Department of Cardiac Sciences, King Fahad Cardiac Center, King Saud University, Riyadh, Saudi Arabia.

7- College of Medicine, Mohammed Bin Rashid University of Medicine and Health Sciences, Dubai, UAE.

8- Department of Cardiology, Sabah Al-Ahmed Cardiac Center, Kuwait.

9- Department of Medicine, Al-Amiri Hospital, Kuwait City, Kuwait.

10- Heart and Vascular Institute. Cleveland Clinic-Abu Dhabi, UAE.

11- Department of Cardiology, Adan Hospital, Kuwait.

12- Department of Cardiology, Dubai hospital, Dubai, United Arab Emirates.

13- Department of Cardiology, Mohammed Bin Khalifa Cardiac Center, Manamah, Bahrain.

14- Department of Cardiology, Faculty of Medicine, Sana'a University, Sana'a, Yemen.

15- Cardiology Department, Tanta University, Egypt.

56 \* Corresponding author: Charbel Abi Khalil. MD, PhD, FESC, FACC. Weill Cornell Medicine-Qatar. PO  
57 box 24144. Doha-Qatar. Email: [cha2022@med.cornell.edu](mailto:cha2022@med.cornell.edu)

## Abstract

**Objectives:** Beta-blockers reduce mortality in heart failure (HF). However, it is not clear whether they should be temporarily withdrawn during acute HF.

**Design:** Analysis of prospectively collected data

**Setting:** The GULF-CARE (Gulf aCute heArt failuRe rEgistry) is a prospective multicenter study of patients hospitalized with acute HF in 7 Middle Eastern countries.

**Participants:** 5005 patients with acute HF.

**Outcome measures:** We studied the effect of beta-blockers non-withdrawal on intra-hospital, 3-month and 12-month mortality and re-hospitalization for HF in patients with acute decompensated chronic heart failure (ADCHF) and acute de-novo heart failure (ADNHF), and a LVEF < 40%.

**Results:** 44.1% of patients were already on beta-blockers on inclusion. Among those, 57.8% had a LVEF <40%. Further, 79.9% were diagnosed with ADCHF and 20.4% with ADNHF. Mean age was 61 (SD 13.9) in the ADCHF group and 59.8 (SD 13.8) in the ADNHF group. Intra-hospital mortality was lower in patients whose beta-blocker therapy was not withdrawn in both the ADCHF and ADNHF groups. This protective effect persisted after multivariate analysis (OR 0.05, 95% CI [0.022-0.112]; OR 0.018, 95% CI [0.003-0.122]; respectively,  $p < 0.001$  for both) and propensity score matching even after correcting for variables that remained significant in the new model (OR 0.084, 95% CI [0.015-0.468],  $p = 0.005$ ; OR 0.047, 95% CI [0.013-0.169],  $p < 0.001$ ; respectively). At 3 months, mortality was still lower only in ADCHF patients in whom beta-blockers were maintained during initial hospitalization. However, the benefit was lost after correcting for confounding factors. Interestingly, re-hospitalization for HF and length of hospital stay were unaffected by beta-blockers discontinuation in all patients.

**Conclusion:** In summary, non-withdrawal of beta-blockers in acute decompensated chronic and de-novo heart failure with reduced ejection fraction is associated with lower intra-hospital mortality, but does influence 3- and 12- month mortality, re-hospitalization for heart failure, and the length of hospital stay.

1  
2  
3  
4  
5  
6  
7  
8  
9  
10  
11  
12  
13  
14  
15  
16  
17  
18  
19  
20  
21  
22  
23  
24  
25  
26  
27  
28  
29  
30  
31  
32  
33  
34  
35  
36  
37  
38  
39  
40  
41  
42  
43  
44  
45  
46  
47  
48  
49  
50  
51  
52  
53  
54  
55  
56  
57  
58  
59  
60

Trial registration number: NCT01467973.

**Keywords**

- Heart failure
- Beta-blockers
- Acute decompensated chronic heart failure
- Acute de-novo heart failure
- Cardiovascular disease

For peer review only



## Strengths and limitations of this study

This is the first study to assess non-withdrawal of beta-blockers in de-novo heart failure.

Like any observational study, selection bias could exist. Moreover, the decision of beta-blocker withdrawal during acute heart failure could have been due to different factors that we did not account for in our analysis.

Furthermore, no information was available regarding the dose of beta-blockers, in particular whether the dose was reduced in patients who continued to use beta-blockers during acute decompensation.

## Introduction

Since the publication of the MERIT-HF, CIBIS-II, US Carvedilol Heart failure and COPENICUS trials<sup>1-4</sup>, in which beta-blockers improved survival in heart failure (HF) patients, international guidelines recommended using this drug class as first-line treatment in chronic HF along with the renin-angiotensin system blockers<sup>5</sup>. Initial safety concerns regarding the use of beta-blockers in patients with HF were dropped with the emergence of several studies that demonstrated up to 30% decrease in mortality risk in those patients<sup>6</sup>. Despite the improvement in the treatment and prognosis of chronic HF, acute HF remains a challenging condition, treatment of which is essentially symptomatic. In the EuroHeart Failure Survey II, in-hospital mortality of patients with acute HF was about 7%<sup>7</sup>, and one-year mortality above 20%<sup>8</sup>. The continuation of beta-blockers during acute HF remains controversial and subject to clinical judgment. The Beta-blocker CONTinuation Vs. INTerruption in patients with Congestive heart failure hospitalized for a decompensation episode (B-CONVINCED) trial, a randomized, controlled, open-labeled study that compared continuation *versus* withdrawal of beta-blockers during acute HF did not report any short-term or long-term benefit in patients assigned to continue their treatment<sup>9</sup>. In a post-hoc analysis of the Survival of Patients With Acute Heart Failure in Need of Intravenous Inotropic Support (SURVIVE) study that had a similar design to B-CONVINCED, 1-month and 3-month mortality decreased in patients whose beta-blockers were not withdrawn during initial hospitalization<sup>10</sup>. However, the protective effect was lost after correcting for classical heart failure covariates.

Currently, there is no large-scale data from the Middle East (ME) with regard to beta-blockers use in HF. The aim of this paper is to report on use of beta-blockers in patients admitted with acute HF and to assess short-term and long-term consequences of withdrawal or continuation of beta-blockers in HF patients with left ventricular dysfunction in the ME.

## Methods

The Gulf CARE (Gulf aCute heArt failuRe registry) is a multinational multicenter prospective observational acute heart failure survey based on cases admitted to various hospitals in 7 countries from the Gulf Middle East, namely Oman, Saudi Arabia, United Arab Emirates (UAE), Qatar, Bahrain, Yemen, and Kuwait. Details of the recruitment of patients, the study design and methods have been published previously<sup>11 12</sup>. In brief, we collected data, as per the case report form, of patients with acute HF from both genders who were above 18 years of age admitted to the participating hospitals. Recruitment started in February 2012 and ended on November 13, 2012. This was preceded by a pilot phase of 1 month in November 2011. The registry continued to follow-up patients at 3 months and 1 year. The registry protocol was approved by each participating center's research ethics committee or institutional review board (IRB): Directorate of research and studies, Ministry of Health - Sultanate of Oman; King Saud University's IRB, Kingdom of Saudi Arabia; Sheikh Khalifa medical city's IRB, UAE; Hamad Medical Corporation's IRB, Qatar; Mohammed Bin Khalifa cardiac center's IRB, Bahrain; Sana'a University' IRB, Yemen and Ministry of health's IRB in Kuwait. The study was registered at clinicaltrials.gov with number NCT01467973. A written informed consent was obtained from all patients

Acute HF was further classified as either acute decompensated chronic heart failure (ADCHF) or acute de-novo heart failure (ADNHF). ADCHF was defined as worsening of HF in patients with a previous diagnosis or hospitalization for HF. ADNHF was defined as acute HF in patients with no prior history of heart failure. All patients were followed-up at 3 months by telephone, and at 1 year either by telephone or by a clinic visit. The registry data was collected on-line using a dedicated Web-site including demographics, risk factors, medical history, clinical manifestations, investigations, medications with dose and management. The participating hospitals ranged from secondary care hospitals to tertiary care hospitals with interventional facilities including device therapy.

1  
2  
3 The inclusion criteria for this analysis was those patients who were on beta-blockers at time of  
4 admission and had a left ventricular ejection fraction (LVEF) < 40%. Those patients with preserved left  
5 ventricular function and not on beta-blockers at time of admission were excluded from further analysis.  
6  
7 Furthermore, 2 cohorts were created, the first with ADCHF and the second with ADNHF. The main  
8 outcome measures were mortality, re-hospitalization for HF, and length of hospital stay. A scheme of  
9 the current prospective trial is described in figure 1.  
10  
11  
12  
13  
14  
15  
16  
17  
18  
19

20 Baseline categorical variables and outcome measures were summarized using frequency distributions  
21 while means and standard deviations were used for continuous variables. Outcome measures and  
22 baseline patients' characteristics were compared between the two groups: withdrawal and non-  
23 withdrawal of beta-blockers using the Chi-squared test (or Fisher's exact test when expected cell  
24 counts fell below 5) for categorical variables and the student's t test or Wilcoxon rank sum test for  
25 numeric variables. Multivariate logistic regression analysis performed for in-hospital and 3-months  
26 included variables that were significantly different between the two groups in addition to age and  
27 gender. The model included age, gender, non-compliance to medication, systolic blood pressure  
28 (SBP), diastolic blood pressure (DBP), left ventricular ejection fraction (LVEF), creatinine, aspirin,  
29 statins and inotropes for ADCHF; and age, gender, ACE-inhibitors and inotropes for ADNHF. Adjusted  
30 Odds Ratios (OR) and 95% Confidence intervals with p values are presented. All analyses were done  
31 separately for the ADCHF and ADNHF patients. In addition, several sensitivity analyses were  
32 performed. Propensity scores were computed using logistic regression with membership in the two  
33 groups as the outcome and baseline variables that were significantly different between the groups as  
34 the independent variables. These scores were used to adjust the association between the mortality  
35 outcomes and the main variable (membership in each group) using multivariate logistic regression.  
36 Moreover, propensity score matching using the most influential variable (inotropes) was used and the  
37 main comparison between the two groups was assessed with and without adjustment to variables that  
38  
39  
40  
41  
42  
43  
44  
45  
46  
47  
48  
49  
50  
51  
52  
53  
54  
55  
56  
57  
58  
59  
60

1  
2  
3 were still significantly different between the two groups even after matching. In ADCHF, variables  
4  
5 adjusted after propensity score matching were gender, non-compliance to medication, SBP, DBP,  
6  
7 statins and aspirin whereas in ADNHF we only adjusted for ACE-inhibitors as the sample sizes became  
8  
9 small after matching. Statistical significance was set at the 5% level (two-tailed test). All analyses were  
10  
11 done using IBM-SPSS version 23.0.  
12  
13

## 14 15 16 17 18 19 20 21 22 23 24 25 26 27 28 29 30 31 32 33 34 35 36 37 38 39 40 41 42 43 44 45 46 47 48 49 50 51 52 53 54 55 56 57 58 59 60

### Results:

Out of the total 5005 participants in the GULF-CARE, 2208 (44.1%) patients were already on beta-blockers on inclusion. Further, beta-blockers were prescribed in 1278 (42.2%) patients with a LVEF <40%. Among those, 1018 (79.9%) were diagnosed with acute decompensated chronic HF (ADCHF) and 260 (20.4%) with acute do-novo heart failure (ADNHF). As shown in table 1, Patients with ADCHF tended to have more comorbidities than patients with ADNHF. They had a higher prevalence of coronary artery disease (CAD), chronic kidney disease (CKD), valvular heart disease, atrial fibrillation (AF) and a lower LVEF; which could explain the more common use of angiotensin receptor antagonists (ARBs), aldosterone antagonists, vitamin K antagonists (VKA) and diuretics in these patients. Interestingly, they smoked less, a phenomenon that could be due to the effect of earlier life-style changes and anti-smoking campaigns in patients with CHF.

**Table 1:** Baseline characteristics of patients on beta-blockers on admission and a left ventricular ejection fraction <40% included in the Gulf-Care.

|  | All patients in Gulf Care<br>N=5005 | Patients with a LVEF <40% on beta-blockers on admission<br>N=1278   |                                                         | P value * |
|--|-------------------------------------|---------------------------------------------------------------------|---------------------------------------------------------|-----------|
|  |                                     | Patients with ADCHF and a LVEF <40%, on beta-blockers on admission. | Patients with ADNHF and a LVEF<40%, on beta-blockers on |           |
|  |                                     |                                                                     |                                                         |           |

|                                            |             | <b>N=1018</b> | <b>admission.</b><br><b>N=260</b> |       |
|--------------------------------------------|-------------|---------------|-----------------------------------|-------|
| Age (years)                                | 59±15       | 61.0±13.9     | 59.8±13.8                         | 0.21  |
| Male gender                                | 3131(62.6%) | 751(73.8%)    | 177(68.1%)                        | 0.07  |
| BMI (kg/m <sup>2</sup> )                   | 28±6        | 27.7±5.8      | 28.1±5.7                          | 0.26  |
| Hypertension                               | 3059(61.1%) | 673(66.1%)    | 181(69.6%)                        | 0.29  |
| Diabetes Mellitus                          | 2492(49.8%) | 569(55.9%)    | 147(56.5%)                        | 0.86  |
| Hyperlipidemia                             | 1799(35.9%) | 464(45.6%)    | 106(40.8%)                        | 0.16  |
| Smoking                                    | 1103(22%)   | 162(15.9%)    | 67 (25.8%)                        | 0.001 |
| <b>Race</b>                                |             |               |                                   |       |
| Arabs                                      | 4516(90.2%) | 937 (92.0%)   | 232(89.2%)                        | 0.04  |
| Asians                                     | 473(9.5%)   | 77(7.6%)      | 28(10.8%)                         |       |
| Others                                     | 16(0.3%)    | 4(0.4%)       | -                                 |       |
| <b>Past – medical history</b>              |             |               |                                   |       |
| Known CAD                                  | 2337(46.7%) | 676(66.4%)    | 150(57.7%)                        | 0.008 |
| Stroke /TIAs                               | 404(8%)     | 96(9.4%)      | 29(11.2%)                         | 0.40  |
| Valvular heart disease                     | 675(13.5%)  | 154(15.1%)    | 19(7.3%)                          | 0.001 |
| Atrial fibrillation                        | 607(12%)    | 170(16.7%)    | 23(8.8 %)                         | 0.001 |
| CKD                                        | 744(14.9%)  | 215(21.1%)    | 28(10.8%)                         | 0.001 |
| <b>Etiology</b>                            |             |               |                                   |       |
| Non-compliance to medication               | 964(19%)    | 300(29.5%)    | 40(15.4%)                         | 0.05  |
| IHD                                        | 1365(27%)   | 204(20,0%)    | 117(45.0%)                        | 0.67  |
| HTN                                        | 410(8.2%)   | 46(4.5%)      | 12(4.6%)                          | 0.26  |
| Arrhythmia                                 | 301(6%)     | 61(6.0%)      | 11(4.2%)                          | 0.49  |
| Anemia                                     | 143(3.1%)   | 23(2.3%)      | 5(1.9%)                           | 0.50  |
| Renal failure                              | 221(4.4%)   | 58(5.7%)      | 9(3.5%)                           | 0.19  |
| <b>Clinical and biochemical parameters</b> |             |               |                                   |       |

|                                      |             |             |             |       |
|--------------------------------------|-------------|-------------|-------------|-------|
| HR, b.p.m                            | 77.6±12.8   | 94.4±22.4   | 94.6±22.3   | 0.92  |
| SBP, mmHg                            | 118±18      | 126.6±30.6  | 133.6±32.4  | 0.002 |
| DBP, mmHg                            | 70±12       | 76.4±17.9   | 80.5±19.3   | 0.001 |
| LVEF (%)                             | 36.9±14     | 26.6±7.1    | 28.8±7.2    | 0.001 |
| BNP, pg/mL                           | 5324±4523   | 6847±9679   | 5227±4924   | 0.21  |
| Creatinine, mmol/L                   | 130±116     | 137.7±116.3 | 128.5±121.9 | 0.24  |
| <b>Medications</b>                   |             |             |             |       |
| Carvedilol                           | 1099(21.9%) | 649(63.8%)  | 100 (38.5%) | 0.001 |
| Bisoprolol                           | 626 (12.5%) | 286 (28.1%) | 90 (34.6%)  | 0.04  |
| Metoprolol                           | 299 (5.9%)  | 64 (6.3%)   | 35 (13.5%)  | 0.001 |
| Atenolol                             | 184 (3.6%)  | 19 (1.9%)   | 35 (13.5%)  | 0.001 |
| ACE-inhibitors                       | 2762(55.2%) | 652(64.0%)  | 166(63.8%)  | 0.96  |
| ARBs                                 | 645(12.9%)  | 180(17.7%)  | 23(8.8%)    | 0.001 |
| Statins                              | 2555(51%)   | 751 (73.8%) | 180(69.2%)  | 0.14  |
| Aspirin                              | 3089(61.7%) | 832 (81.7%) | 204(78.5%)  | 0.23  |
| VKA                                  | 618(12%)    | 221(21.7%)  | 19(7.3%)    | 0.001 |
| Ibravadine                           | 115(2.3%)   | 48(4.7%)    | 7(2.7%)     | 0.15  |
| Aldosterone antagonists              | 840(16.8%)  | 419(41.2%)  | 45(17.3%)   | 0.001 |
| Clopidogrel                          | 966(19%)    | 301(29.6%)  | 81(31.2%)   | 0.61  |
| Diuretics                            | 2882(57.6%) | 920(90.4%)  | 113(43.5%)  | 0.001 |
| Inotropes use during hospitalization | 783 (16%)   | 156 (15.3%) | 51 (19.6%)  | 0.96  |

All values are given as n (%) or mean ±SD. \* p value: patients with acute decompensated chronic heart failure and LVEF <40% on beta-blockers on admission vs. de - Novo heart failure and LVEF <40% on beta-blockers on admission. ADCHF = Acute decompensated chronic heart failure, ADNHF = Acute de-novo heart failure, BMI=body mass index, CAD= coronary artery disease, TIAs=transient ischemic attacks, CKD=chronic kidney disease, HR=heart rate, SBP= systolic blood pressure, DBP= diastolic blood pressure, LVEF = Left ventricular ejection fraction, VKA= Vitamin K antagonists, ARBs= Angiotensin receptor blockers.

Beta-blockers were withdrawn in 9% of the patients in the ADCHF group and 13.8% in the ADNHF group. Those ADCHF patients in whom beta-blockers were discontinued had a lower blood pressure at inclusion and half of them required inotropic support during hospitalization (**supplementary table 1**).

ADNHF patients who continued beta-blockade therapy were more commonly prescribed ACE-inhibitors and required less inotropic support (**supplementary table 2**).

In the ADCHF group, 15 (1.6%) in-hospital deaths occurred in patients whose beta-blocker therapy was not withdrawn as compared to 37 (40.2%) when beta-blockers were discontinued ( $p < 0.001$ ) (**Table 2**).

**Table 2:** Effect of non-withdrawal of beta-blockers in acute decompensated chronic heart failure with beta-blocker therapy on admission and a LVEF  $< 40\%$

|                            | All patients with acute decompensated heart failure, LVEF $< 40\%$ and on beta-treatment on admission<br>N=1018 | Beta-blockers maintained during hospitalization<br>N=926(91%) | Beta-blockers withdrawn during hospitalization<br>N=92(9.0%) | P value   |
|----------------------------|-----------------------------------------------------------------------------------------------------------------|---------------------------------------------------------------|--------------------------------------------------------------|-----------|
| <b>In-hospital outcome</b> |                                                                                                                 |                                                               |                                                              |           |
| Death                      | 52/1018(5.1%)                                                                                                   | 15/926(1.6%)                                                  | 37/92(40.2%)                                                 | $< 0.001$ |
| Length of stay (days)      | 9.9 $\pm$ 15.0                                                                                                  | 9.7 $\pm$ 15.1                                                | 12.3 $\pm$ 13.6                                              | 0.1       |
| <b>3-month follow-up</b>   |                                                                                                                 |                                                               |                                                              |           |
| Death                      | 86/946(9.1%)                                                                                                    | 77/896(8.6%)                                                  | 9/50(18.0%)                                                  | 0.038     |
| Re-hospitalization for HF  | 219/859(25.5%)                                                                                                  | 204/818(24.9%)                                                | 15/41(36.6%)                                                 | 0.09      |
| Length of stay (days)      | 8.1 $\pm$ 7.6                                                                                                   | 8.1 $\pm$ 7.8                                                 | 7.7 $\pm$ 4.3                                                | 0.86      |
| <b>12-month follow-up</b>  |                                                                                                                 |                                                               |                                                              |           |
| Death                      | 139/880(15.8%)                                                                                                  | 128/835(15.3%)                                                | 11/45(24.4%)                                                 | 0.10      |



|                           |                 |                 |               |      |
|---------------------------|-----------------|-----------------|---------------|------|
| Re-hospitalization for HF | 333/741 (44.9%) | 316/707 (44.7%) | 17/34 (50.0%) | 0.54 |
| Length of stay (days)     | 9.6±12.0        | 9.6±12.1        | 10.9±11.1     | 0.73 |

The frequencies and percentages for death, re-hospitalization for heart failure (HF) and length of hospital stay. Death rates were cumulative. All values are given as n (%) or mean ±SD.

Multivariate analysis showed that age, gender, non-compliance to medication, SBP, DBP, creatinine and statins were not predictors of in-hospital mortality in case of non-withdrawal of beta-blockers. As expected, inotropic use was significantly associated with higher mortality in our model (**Table 3**).

**Table 3:** Multivariate analysis for intra-hospital and 3-month mortality in patients with ADCHF, a LVEF <40% and beta-blockers on admission.

|                                           | Variable                          | OR     | 95% .C.I     | P value |
|-------------------------------------------|-----------------------------------|--------|--------------|---------|
| <b>In-hospital mortality</b>              | Age                               | 1.022  | 0.991-1.055  | 0.17    |
|                                           | Gender                            | 1.058  | 0.428-2.618  | 0.90    |
|                                           | Non-compliance to medication      | 1.736  | 0.642-4.698  | 0.27    |
|                                           | SBP                               | 0.990  | 0.968-1.014  | 0.41    |
|                                           | DBP                               | 1.003  | 0.964-1.044  | 0.87    |
|                                           | LVEF                              | 1.053  | 0.998-1.003  | 0.07    |
|                                           | Creatinine                        | 1.001  | 0.998-1.001  | 0.59    |
|                                           | Aspirin                           | 1.357  | 0.477-3.865  | 0.56    |
|                                           | Statins                           | 2.083  | 0.763-5.684  | 0.15    |
|                                           | Inotropes                         | 20.368 | 8.241-50.337 | <0.001  |
|                                           | <b>Beta-blockers on discharge</b> |        |              |         |
| Beta-blockers withdrawn (reference group) | 1                                 |        | -            |         |

1  
2  
3  
4  
5  
6  
7  
8  
9  
10  
11  
12  
13  
14  
15  
16  
17  
18  
19  
20  
21  
22  
23  
24  
25  
26  
27  
28  
29  
30  
31  
32  
33  
34  
35  
36  
37  
38  
39  
40  
41  
42  
43  
44  
45  
46  
47  
48  
49  
50  
51  
52  
53  
54  
55  
56  
57  
58  
59  
60

|  |                          |       |             |        |
|--|--------------------------|-------|-------------|--------|
|  | Beta-blockers maintained | 0.050 | 0.022-0.112 | <0.001 |
|--|--------------------------|-------|-------------|--------|

For peer review only

|                          |                                           |             |             |       |
|--------------------------|-------------------------------------------|-------------|-------------|-------|
| <b>3-month mortality</b> | Age                                       | 1.029       | 1.010-1.048 | 0.002 |
|                          | Gender                                    | 0.974       | 0.579-1.638 | 0.92  |
|                          | Non-compliance to medication              | 1.267       | 0.753-2.133 | 0.37  |
|                          | SBP                                       | 0.993       | 0.980-1.005 | 0.26  |
|                          | DBP                                       | 1.005       | 0.984-1.026 | 0.66  |
|                          | LVEF                                      | 1.003       | 0.970-1.037 | 0.87  |
|                          | Creatinine                                | 1.001       | 1.000-1.003 | 0.15  |
|                          | Aspirin                                   | 1.516       | 0.828-2.777 | 0.17  |
|                          | Statins                                   | 1.307       | 0.747-2.284 | 0.34  |
|                          | Inotropes                                 | 1.456       | 0.759-2.793 | 0.25  |
|                          | <b>Beta-blockers on discharge</b>         |             |             |       |
|                          | Beta-blockers withdrawn (reference group) | 1           |             |       |
| Beta-blockers maintained | 0.513                                     | 0.231-1.143 | 0.10        |       |

SBP= systolic blood pressure, DBP = diastolic blood pressure, LVEF = Left ventricular ejection fraction.

Nevertheless, non-withdrawal of beta-blockers was associated with less mortality risk even after correcting for all the parameters (OR=0.05, 95% CI: 0.022-0.112,  $p<0.001$ ). To confirm our findings, we performed a propensity score matching on inotropic use (**supplementary Table 3**). Non-withdrawal of beta-blockers was associated with less mortality in the propensity model (OR=0.05, 95% CI: 0.015-0.170,  $p<0.001$ ), even after correcting for variables that remained significantly different in the new model (OR=0.084, 95% CI: 0.015-0.468,  $p=0.005$ ). At 3 months, fewer deaths also occurred in the group of patients whose beta-blockers therapy was not withdrawn ( $p=0.038$ ). However, after multivariate logistic regression analysis, the protection conferred by beta-blockade continuation was lost (OR=0.513, 95% CI: 0.231-1.143,  $p=0.10$ ).

In the ADNHF group, 5 (2.2%) in-hospital deaths occurred in patients whose beta-blocker therapy was not withdrawn as compared to 17 (47.2%) when beta-blockers were discontinued ( $p < 0.001$ ). However, mortality rates were comparable at 3 months and one year (**Table 4**).

**Table 4:** Effect of non-withdrawal of beta-blockers in acute decompensated de-novo heart failure with beta-blocker therapy on admission, and a LVEF  $< 40\%$

|                            | All patients with de-novo heart failure, LVEF $< 40\%$ and on beta-blockers treatment on admission.<br>N=260 | Beta-blockers maintained during hospitalization<br>N=224(86.2%) | Beta-blockers withdrawn during hospitalization<br>N=36(13.8%) | p- value    |
|----------------------------|--------------------------------------------------------------------------------------------------------------|-----------------------------------------------------------------|---------------------------------------------------------------|-------------|
| <b>In-hospital outcome</b> |                                                                                                              |                                                                 |                                                               |             |
| Death                      | 22/260(8.5%)                                                                                                 | 5/224(2.2%)                                                     | 17/36(47.2%)                                                  | $< 0.001^*$ |
| Length of stay (days)      | 9.7 $\pm$ 16.1                                                                                               | 9.6 $\pm$ 16.6                                                  | 10.1 $\pm$ 12.1                                               | 0.86        |
| <b>3 months follow-up</b>  |                                                                                                              |                                                                 |                                                               |             |
| Death                      | 9/232(3.9%)                                                                                                  | 7/214(3.3%)                                                     | 2/18(11.1%)                                                   | 0.14        |
| Re-hospitalization for HF  | 39/223(17.5%)                                                                                                | 38/207(18.4%)                                                   | 1/16(6.3%)                                                    | 0.31        |
| Length of stay (days)      | 8.8 $\pm$ 9.8                                                                                                | 8.8 $\pm$ 9.9                                                   | 8.0 $\pm$ NE                                                  | NE          |
| <b>1 year follow-up</b>    |                                                                                                              |                                                                 |                                                               |             |
| Death                      | 15/221(6.8%)                                                                                                 | 13/206(6.3%)                                                    | 2/15(13.3%)                                                   | 0.27        |
| Re-hospitalization for HF  | 61/206(29.6%)                                                                                                | 73/193(37.8%)                                                   | 3/13(23.1%)                                                   | 0.38        |

|                       |         |         |         |      |
|-----------------------|---------|---------|---------|------|
| Length of stay (days) | 7.9±7.5 | 8.2±7.6 | 2.7±2.1 | 0.21 |
|-----------------------|---------|---------|---------|------|

The frequencies and percentages for death, re-hospitalization for heart failure (HF) and length of hospital stay. Death rates were cumulative. All values are given as n (%) or mean ±SD. NE=not estimable.

Multivariate analysis did not show that age, gender or Ace-inhibitors, which were different among both groups, predicted mortality (**Table 5**).

**Table 5:** Multivariate analysis for intra-hospital death in patients with ADNHF, a LVEF <40% and beta-blockers on admission

| Variable                                  | OR      | 95 % C.I        | P value |
|-------------------------------------------|---------|-----------------|---------|
| Age                                       | 1.047   | 0.992-1.105     | 0.097   |
| Gender                                    | 2.179   | 0.431-10.989    | 0.346   |
| ACE-inhibitors                            | 1.112   | 0.215-5.757     | 0.899   |
| Inotropes                                 | 172.272 | 16.002-1854.600 | <0.001* |
| <b>Beta-blockers</b>                      |         |                 |         |
| Beta-blockers withdrawn (reference group) | 1       |                 |         |
| Beta-blockers maintained                  | 0.018   | 0.003-0.122     | <0.001* |

SBP= systolic blood pressure, DBP = diastolic blood pressure, LVEF = Left ventricular ejection fraction.

Similarly, to the ADCHF, inotropic use was highly associated with mortality. We also performed a propensity score matching on inotropic use (**supplementary Table 4**) and confirmed that beta-blocker continuation in ADNHF has a favorable outcome (OR=0.05, 95% CI: 0.015-0.170, p<0.001), even after

1  
2  
3 correcting for variables that remained significantly different between both groups in the new model  
4  
5 (OR=0.047, 95% CI: 0.013-0.169, p<0.001). Similarly to patients with ADCHF, re-hospitalization for HF  
6  
7 and length of hospital stay were unaffected by the withdrawal of beta-blockers.  
8  
9  
10  
11  
12  
13  
14  
15  
16  
17  
18  
19  
20  
21  
22  
23  
24  
25  
26  
27  
28  
29  
30  
31  
32  
33  
34  
35  
36  
37  
38  
39  
40  
41  
42  
43  
44  
45  
46  
47  
48  
49  
50  
51  
52  
53  
54  
55  
56  
57  
58  
59  
60

For peer review only

## Discussion

This observational study demonstrates that pursuing beta-blocker therapy during acute HF confers to patients with chronic and de-novo acute HF cardiovascular protection and decreases mortality. Interestingly, randomized placebo-controlled trials that assessed pursuing beta-blockers versus withdrawal during acute HF are missing; available data are extrapolated from post-hoc analysis. The B-convinced was designed as a non-inferiority trial and demonstrated only safety of beta-blockers during acute decompensation<sup>9</sup>. In a retrospective analysis of the SURVIVE study that initially assessed 2 inotropic treatments in critical patients with acute HF, the benefit associated with non-withdrawal of beta-blockers was lost after correcting for HF covariates; only patients who never received beta-blockers had a worse outcome as compared to patients who were on these drugs at inclusion and on discharge<sup>10</sup>. In a sub-analysis of the Evaluation Study of Congestive Heart Failure and Pulmonary Artery Catheterization (ESCAPE) that assessed pulmonary artery catheter use among patients admitted with acute HF, patients already prescribed beta-blockers on admission had a lower 6-month mortality risk and a shorter hospitalization stay<sup>13</sup>. Outcomes of the Prospective Trial of Intravenous Milrinone for Exacerbations of Chronic Heart Failure (OPTIME-CHF), designed as a randomized placebo-controlled trial, failed to test the superiority of milrinone to placebo in patients with ADCHF<sup>14</sup>. Further observational analysis showed that withdrawal of beta-blockers was associated with a greater risk of 2-month mortality and re-hospitalization for HF despite limitations due to the use of milrinone in those patients and the small number of patients analyzed<sup>15</sup>.

Our results are comparable to previous observational studies from North America and Europe. In the Italian Survey on Acute Heart Failure, withdrawal of beta-blockers during acute HF was associated with almost 4-fold increase in the risk of intra-hospital mortality<sup>16</sup>. The Organized Program to Initiate Lifesaving Treatment in Hospitalized Patients with Heart Failure (OPTIMIZE-HF) is one of the largest Northern American registries of patients admitted with acute HF. Maintenance of beta-blockers during

1  
2  
3 acute decompensation was associated with better outcome in post-discharge mortality<sup>17</sup>. Consistent  
4  
5 with our findings, Prins et al reported in a recent meta-analysis that included over 2700 patients treated  
6  
7 with beta-blockers and hospitalized for acute HF, that withdrawal of beta-blockers significantly  
8  
9 increased in-hospital and short term mortality, and re-hospitalization for HF<sup>18</sup>.

10  
11  
12 Despite firm safety data and un-doubted long-term benefit, beta-blocker therapy remains under-  
13  
14 prescribed. In our study, only 44.1% of all patients presenting with acute HF and 44.2 % of patients with  
15  
16 a LVEF<40% were treated with beta-blockers. The frequency of beta-blockers prescription is variable  
17  
18 according to cohorts and ranges from 32% in the “Italian Survey on Acute Heart Failure” study<sup>16</sup> to  
19  
20 53.3% in the SURVIVE study<sup>10</sup> and 62% in the ESCAPE trial<sup>13</sup>.

21  
22  
23 It is not known why withdrawal of beta-blockers in acute HF is associated with a worse prognosis.  
24  
25 Activation of the sympathetic system, increase of catecholamine levels and alterations in cardiac  $\beta$ -  
26  
27 receptors are the hallmark of chronic HF; therefore beta-blocker therapy in chronic HF could limit the  
28  
29 deleterious effect of chronic  $\beta$ -receptor stimulation such as arrhythmias, hypertrophy and  
30  
31 cardiomyocytes apoptosis<sup>19</sup>. It may be possible that withdrawal of beta-blockers in the acute phase  
32  
33 takes away earlier protective effect of beta-adrenergic inhibition at a time when the neuro-hormonal  
34  
35 system is activated and catecholamines are significantly increased<sup>20</sup>.

36  
37  
38  
39  
40 Managing beta-blockers during acute HF is still unclear to most physicians. The Process for  
41  
42 Assessment of Carvedilol Therapy in Heart Failure (IMPACT-HF) trial investigators were the first to  
43  
44 report that in-hospital initiation of beta-blockers was safe compared to post-discharge<sup>21</sup>. The latest  
45  
46 guidelines from both the Society of Cardiology (ESC)<sup>22</sup> and the American college of Cardiology  
47  
48 foundation (ACCF)/American heart association (AHA)<sup>23</sup> recommend initiating a beta-blocker therapy  
49  
50 following acute HF as soon as the patient is stable and before discharge. However, uncertainty persists  
51  
52 in regards to continuing beta-blockers during an acute decompensation. Beta-blockade therapy  
53  
54 discontinuation during AHF is variable. In older studies such as the OPTIME-CHF, beta-blockers were  
55  
56  
57  
58  
59  
60



1  
2  
3 withdrawn in over 20% of patients <sup>15</sup>. In our study, beta-blockers were withdrawn in 9% of patients with  
4  
5 ADCHF and 13.8% of patients with ADNHF. Those numbers are almost similar to the Italian Survey on  
6  
7 Acute Heart Failure in which Orso et al reported a withdrawal rate of 9% in all AHF patients with beta-  
8  
9 blockers on admission <sup>16</sup> However, Bohm et al reported a lower rate ( 6.8%) in the retrospective  
10  
11 analysis of the SURVIVE study<sup>10</sup>.  
12  
13

14  
15 It is not known why mortality risk reduction extends up to 3 months in ADCHF but not in ADNHF  
16  
17 although the first group has higher cardiovascular comorbidities and more severe risk factors. One  
18  
19 explanation could be the higher prescription of cardioprotective drugs such as ACE inhibitors, ARBs,  
20  
21 diuretics; all having shown to reduce mortality in patients with chronic HF and improve the outcome <sup>24-</sup>  
22  
23 <sup>26</sup>. One other explanation would also be the frequent use of beta-blockers approved for HF in patients  
24  
25 with ADCHF whereas the prescription of non-HF selective beta-blockers such as atenolol was more  
26  
27 common in ADNHF. Finally, we cannot rule out that the relatively small number of patients with  
28  
29 ADNHF, coupled to an even smaller death rate at 3 months, does not enable us draw any meaningful  
30  
31 conclusions on long-term mortality in those patients.  
32  
33  
34

35  
36 Our study has a few limitations. Like any observational study, selection bias could exist. The decision of  
37  
38 beta-blocker withdrawal during acute HF could have been to different factors not accounted for in our  
39  
40 analysis such as their side effects. Above all, beta-blocker therapy could have been withdrawn in the  
41  
42 more severe patients with a poor prognosis. Despite the correction on available cofounding factors, we  
43  
44 could have missed other markers of disease severity that were not recorded in the cohort. In addition,  
45  
46 we could not determine whether the dosage of beta-blockers on admission, or any reduction during  
47  
48 hospitalization, might have influenced the outcome. Finally, the duration of beta-blocker treatment prior  
49  
50 to acute HF was not recorded; this variable could also be a confounding factor since long-term beta-  
51  
52 blocker treatment could have been more beneficial than short-term.  
53  
54  
55  
56  
57  
58  
59  
60

## Conclusion

Our study suggests non-withdrawal of beta-blocker therapy during acute heart failure reduces intra-hospital mortality risk in patients with acute decompensated chronic and de-novo heart failure, but does influence 3- and 12- mortality, re-hospitalization for heart failure, and the length of hospital stay. Our findings could only be validated in randomized controlled trials designed to show the superiority of non-withdrawal of beta-blockade therapy and also determine whether beta-blocker dose should be reduced or kept unchanged compared to a withdrawal strategy.

## References:

1. Effect of metoprolol CR/XL in chronic heart failure: Metoprolol CR/XL Randomised Intervention Trial in Congestive Heart Failure (MERIT-HF). *Lancet* 1999;353(9169):2001-7.
2. The Cardiac Insufficiency Bisoprolol Study II (CIBIS-II): a randomised trial. *The Lancet* 1999;353(9146):9-13. doi: 10.1016/s0140-6736(98)11181-9
3. Krum H, Roecker EB, Mohacsi P, et al. Effects of initiating carvedilol in patients with severe chronic heart failure: results from the COPERNICUS Study. *JAMA* 2003;289(6):712-8.
4. Packer M, Bristow MR, Cohn JN, et al. The effect of carvedilol on morbidity and mortality in patients with chronic heart failure. U.S. Carvedilol Heart Failure Study Group. *N Engl J Med* 1996;334(21):1349-55. doi: 10.1056/NEJM199605233342101
5. Yancy CW, Jessup M, Bozkurt B, et al. 2013 ACCF/AHA guideline for the management of heart failure: executive summary: a report of the American College of Cardiology Foundation/American Heart Association Task Force on practice guidelines. *Circulation* 2013;128(16):1810-52. doi: 10.1161/CIR.0b013e31829e8807
6. Foody JM, Farrell MH, Krumholz HM. beta-Blocker therapy in heart failure: scientific review. *JAMA* 2002;287(7):883-9.
7. Nieminen MS, Brutsaert D, Dickstein K, et al. EuroHeart Failure Survey II (EHFS II): a survey on hospitalized acute heart failure patients: description of population. *Eur Heart J* 2006;27(22):2725-36. doi: 10.1093/eurheartj/ehl193
8. Harjola VP, Follath F, Nieminen MS, et al. Characteristics, outcomes, and predictors of mortality at 3 months and 1 year in patients hospitalized for acute heart failure. *Eur J Heart Fail* 2010;12(3):239-48. doi: 10.1093/eurjhf/hfq002
9. Jondeau G, Neuder Y, Eicher JC, et al. B-CONVINCED: Beta-blocker CONTinuation Vs. INTerruption in patients with Congestive heart failure hospitalized for a decompensation episode. *Eur Heart J* 2009;30(18):2186-92. doi: 10.1093/eurheartj/ehp323
10. Bohm M, Link A, Cai D, et al. Beneficial association of beta-blocker therapy on recovery from severe acute heart failure treatment: data from the Survival of Patients With Acute Heart Failure in Need of Intravenous Inotropic Support trial. *Crit Care Med* 2011;39(5):940-4. doi: 10.1097/CCM.0b013e31820a91ed
11. Sulaiman K, Panduranga P, Al-Zakwani I, et al. Clinical characteristics, management, and outcomes of acute heart failure patients: observations from the Gulf acute heart failure registry (Gulf CARE). *Eur J Heart Fail* 2015;17(4):374-84. doi: 10.1002/ejhf.245
12. Sulaiman KJ, Panduranga P, Al-Zakwani I, et al. Rationale, Design, Methodology and Hospital Characteristics of the First Gulf Acute Heart Failure Registry (Gulf CARE). *Heart Views* 2014;15(1):6-12. doi: 10.4103/1995-705X.132137
13. Butler J, Young JB, Abraham WT, et al. Beta-blocker use and outcomes among hospitalized heart failure patients. *J Am Coll Cardiol* 2006;47(12):2462-9. doi: 10.1016/j.jacc.2006.03.030
14. Cuffe MS, Califf RM, Adams KF, Jr., et al. Short-term intravenous milrinone for acute exacerbation of chronic heart failure: a randomized controlled trial. *JAMA* 2002;287(12):1541-7.
15. Gattis WA, O'Connor CM, Leimberger JD, et al. Clinical outcomes in patients on beta-blocker therapy admitted with worsening chronic heart failure. *Am J Cardiol* 2003;91(2):169-74.
16. Orso F, Baldasseroni S, Fabbri G, et al. Role of beta-blockers in patients admitted for worsening heart failure in a real world setting: data from the Italian Survey on Acute Heart Failure. *Eur J Heart Fail* 2009;11(1):77-84. doi: 10.1093/eurjhf/hfn008
17. Fonarow GC, Abraham WT, Albert NM, et al. Influence of beta-blocker continuation or withdrawal on outcomes in patients hospitalized with heart failure: findings from the OPTIMIZE-HF program. *J Am Coll Cardiol* 2008;52(3):190-9. doi: 10.1016/j.jacc.2008.03.048
18. Prins KW, Neill JM, Tyler JO, et al. Effects of Beta-Blocker Withdrawal in Acute Decompensated Heart Failure: A Systematic Review and Meta-Analysis. *JACC Heart Fail* 2015;3(8):647-53. doi: 10.1016/j.jchf.2015.03.008
19. Lohse MJ, Engelhardt S, Eschenhagen T. What is the role of beta-adrenergic signaling in heart failure? *Circ Res* 2003;93(10):896-906. doi: 10.1161/01.RES.0000102042.83024.CA
20. Onwuanyi A, Taylor M. Acute decompensated heart failure: pathophysiology and treatment. *Am J Cardiol* 2007;99(6B):25D-30D. doi: 10.1016/j.amjcard.2006.12.017
21. Gattis WA, O'Connor CM, Gallup DS, et al. Predischarge initiation of carvedilol in patients hospitalized for decompensated heart failure: results of the Initiation Management Predischarge: Process for Assessment

- 1  
2  
3 of Carvedilol Therapy in Heart Failure (IMPACT-HF) trial. *J Am Coll Cardiol* 2004;43(9):1534-41. doi:  
4 10.1016/j.jacc.2003.12.040
- 5 22. McMurray JJ, Adamopoulos S, Anker SD, et al. ESC guidelines for the diagnosis and treatment of acute and  
6 chronic heart failure 2012: The Task Force for the Diagnosis and Treatment of Acute and Chronic Heart  
7 Failure 2012 of the European Society of Cardiology. Developed in collaboration with the Heart Failure  
8 Association (HFA) of the ESC. *Eur J Heart Fail* 2012;14(8):803-69. doi: 10.1093/eurjhf/hfs105
- 9 23. Writing Committee M, Yancy CW, Jessup M, et al. 2013 ACCF/AHA guideline for the management of heart  
10 failure: a report of the American College of Cardiology Foundation/American Heart Association Task  
11 Force on practice guidelines. *Circulation* 2013;128(16):e240-327. doi: 10.1161/CIR.0b013e31829e8776
- 12 24. Granger CB, McMurray JJ, Yusuf S, et al. Effects of candesartan in patients with chronic heart failure and  
13 reduced left-ventricular systolic function intolerant to angiotensin-converting-enzyme inhibitors: the  
14 CHARM-Alternative trial. *Lancet* 2003;362(9386):772-6. doi: 10.1016/S0140-6736(03)14284-5
- 15 25. Effect of enalapril on survival in patients with reduced left ventricular ejection fractions and congestive heart  
16 failure. The SOLVD Investigators. *N Engl J Med* 1991;325(5):293-302. doi:  
17 10.1056/NEJM199108013250501
- 18 26. Taylor AL, Ziesche S, Yancy C, et al. Combination of isosorbide dinitrate and hydralazine in blacks with heart  
19 failure. *N Engl J Med* 2004;351(20):2049-57. doi: 10.1056/NEJMoa042934
- 20  
21  
22  
23  
24  
25  
26  
27  
28  
29  
30  
31  
32  
33  
34  
35  
36  
37  
38  
39  
40  
41  
42  
43  
44  
45  
46  
47  
48  
49  
50  
51  
52  
53  
54  
55  
56  
57  
58  
59  
60

## Footnotes

Contribution: KS, KFA, NA, AA-A, MA-J, BB, WA, MR, NB, HA, AA-M, HAF, AE, PP and JAS were involved in the design of the Gulf CARE registry and patient enrolment and ensuring quality control of the study. CAK designed the analysis and wrote the manuscript. ZM and RS carried out the statistical analyses. All authors approved the final version of the manuscript.

Funding: Gulf CARE is an investigator-initiated study conducted under the auspices of the Gulf Heart Association and funded by Servier, Paris, France; and (for centres in Saudi Arabia) by the Saudi Heart Association. Dr Abi Khalil's lab is funded by the biomedical research program (BMRP) at Weill Cornell Medicine-Qatar, a program funded by Qatar Foundation, and by 2 grants from the Qatar National Research Funds under its National Priorities Research Programs award numbers (NPRP 7 - 701 - 3 - 192 and NPRP 9-169-3-024). Dr Al-Habib's lab is funded by the Saudi Heart Association and The Deanship of Scientific Research at King Saud University, Riyadh, Saudi Arabia (Research group number: RG -1436-013). All of the above-mentioned sources did not have a role in the study's concept, analysis and writing of the manuscript.

Acknowledgment: We would like to acknowledge Andrew Bliszczyk for editorial assistance.

Competing interests: None.

Data sharing statement: The data includes human data. To protect participant privacy, the data is available on request from the corresponding author:

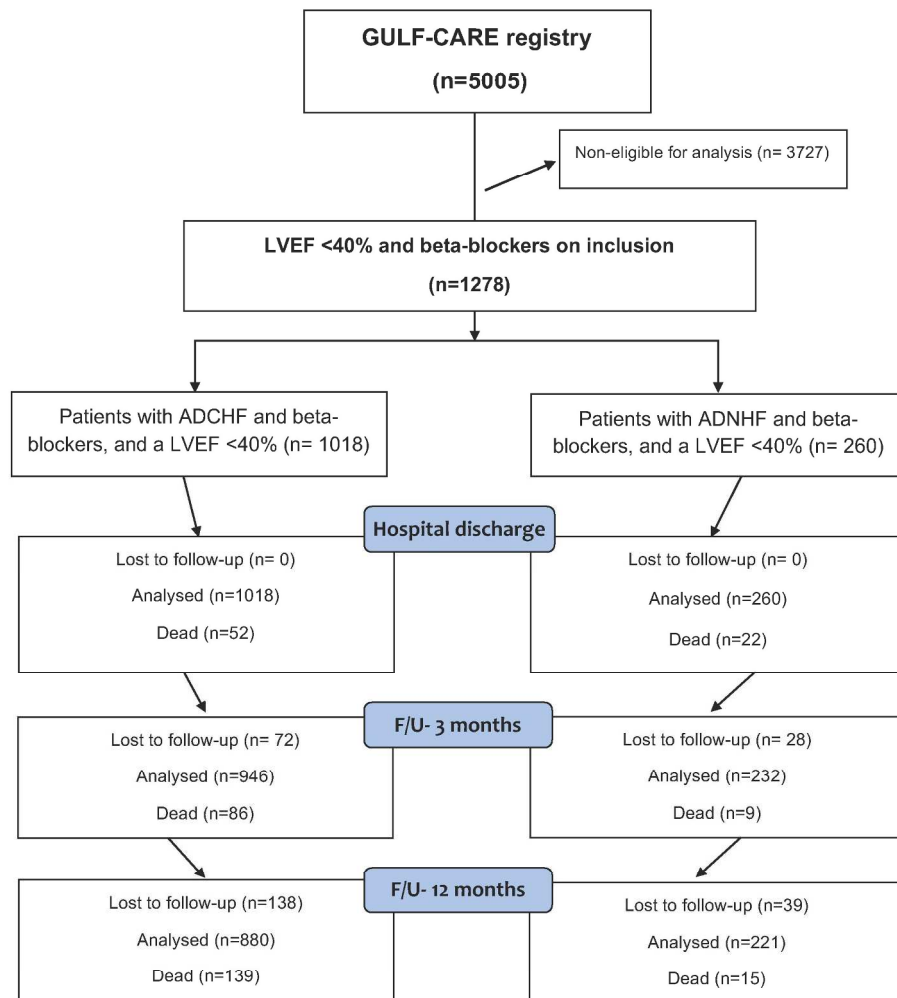

Figure 1: Flow chart of the current prospective analysis. 1278 patients with a LVEF <40% and beta-blockers on admission were analyzed from the 5005 participants in the GULF-CARE registry. ADCHF = Acute decompensated chronic heart failure, ADNHF = Acute de-novo heart failure, LVEF = Left ventricular ejection fraction, F/U= Follow-up.

211x230mm (300 x 300 DPI)

**Supplementary table 1:** Baseline characteristics of patients with acute decompensated chronic heart failure and a left ventricular ejection fraction <40%, on beta-blockers on admission

|                                            | Patients with ADCHF with a LVEF <40% and beta-blockers on admission<br>N=1018 | Beta-blockers maintained during hospitalization<br>N=926 | Beta-blockers withdrawn during hospitalization<br>N=92 | p value |
|--------------------------------------------|-------------------------------------------------------------------------------|----------------------------------------------------------|--------------------------------------------------------|---------|
| Age (years)                                | 61.0±13.9                                                                     | 61.1±13.7                                                | 60.3±15.8                                              | 0.64    |
| Male gender                                | 751(73.8%)                                                                    | 689(74.4%)                                               | 62(67.4%)                                              | 0.14    |
| BMI (kg/m <sup>2</sup> )                   | 27.7±5.8                                                                      | 27.6±5.8                                                 | 28.3±5.7                                               | 0.28    |
| Hypertension                               | 673(66.1%)                                                                    | 620(67.0%)                                               | 53(57.6%)                                              | 0.07    |
| Diabetes Mellitus                          | 569(55.9%)                                                                    | 518(55.9%)                                               | 51(55.4%)                                              | 0.92    |
| Hyperlipidemia                             | 464(45.6%)                                                                    | 419(45.2%)                                               | 45(48.9%)                                              | 0.50    |
| Smoking                                    | 162(15.9%)                                                                    | 149(16.1%)                                               | 13(14.1%)                                              | 0.62    |
| <b>Race</b>                                |                                                                               |                                                          |                                                        |         |
| Arabs                                      | 937 (92.0%)                                                                   | 852(92.0%)                                               | 85(92.4%)                                              | 0.37    |
| Asians                                     | 77(7.6%)                                                                      | 71(7.7%)                                                 | 6(6.5%)                                                |         |
| Others                                     | 4(0.4%)                                                                       | 3(0.3%)                                                  | 1(1.1%)                                                |         |
| <b>Past – medical history</b>              |                                                                               |                                                          |                                                        |         |
| Known CAD                                  | 676(66.4%)                                                                    | 617(66.6%)                                               | 59(64.1%)                                              | 0.62    |
| Stroke /TIAs                               | 96(9.4%)                                                                      | 89(9.6%)                                                 | 7(7.6%)                                                | 0.53    |
| Valvular heart disease                     | 154(15.1%)                                                                    | 139(15.0%)                                               | 15(16.3%)                                              | 0.74    |
| Atrial fibrillation                        | 170(16.7%)                                                                    | 157(17.0%)                                               | 13(14.1%)                                              | 0.48    |
| CKD                                        | 215(21.1%)                                                                    | 192(20.7%)                                               | 23(25.0%)                                              | 0.33    |
| <b>Etiology</b>                            |                                                                               |                                                          |                                                        |         |
| Non-Compliance Medication                  | 300(29.5%)                                                                    | 281(30.3%)                                               | 19(20.7%)                                              | 0.052   |
| IHD                                        | 204(20,0%)                                                                    | 184(19.9%)                                               | 20(21.7%)                                              | 0.66    |
| HTN                                        | 46(4.5%)                                                                      | 44(4.8%)                                                 | 2(2.2%)                                                | 0.42    |
| Arrhythmia                                 | 61(6.0%)                                                                      | 57(6.2%)                                                 | 4(4.3%)                                                | 0.48    |
| Anemia                                     | 23(2.3%)                                                                      | 20(2.2%)                                                 | 3(3.3%)                                                | 0.45    |
| Renal failure                              | 58(5.7%)                                                                      | 50(5.4%)                                                 | 8(8.7%)                                                | 0.19    |
| <b>Clinical and biochemical parameters</b> |                                                                               |                                                          |                                                        |         |

|                                     |             |             |             |         |
|-------------------------------------|-------------|-------------|-------------|---------|
| HR, b.p.m                           | 94.4±22.4   | 94.8±22.5   | 91.1±21.2   | 0.14    |
| SBP, mmHg                           | 126.6±30.6  | 127.8±30.3  | 114.2±31.3  | <0.001  |
| DBP, mmHg                           | 76.4±17.9   | 77.2±17.8   | 67.8±17.2   | <0.001  |
| LVEF (%)                            | 26.6±7.1    | 26.7±7.1    | 25.6±7.6    | 0.16    |
| BNP, pg/mL                          | 6847±9679   | 6851±9831   | 6777±7271   | 0.97    |
| Creatinin, mmol/L                   | 137.7±116.3 | 135.7±113.4 | 158.5±141.4 | 0.07    |
| <b>Medications</b>                  |             |             |             |         |
| Carvedilol                          | 649(63.8%)  | 589 (63.6%) | 60(65.2%)   | 0.75    |
| Bisoprolol                          | 286 (28.1%) | 265(28.6%)  | 21(22.8%)   | 0.23    |
| Metoprolol                          | 64 (6.3%)   | 57(6.2%)    | 7(7.6%)     | 0.58    |
| Atenolol                            | 19 (1.9%)   | 15(1.6%)    | 4(4.3%)     | 0.08    |
| ACE-inhibitors                      | 652(64.0%)  | 600(64.8%)  | 52(56.5%)   | 0.11    |
| ARBs                                | 180(17.7%)  | 167 (18.0%) | 13(14.1%)   | 0.34    |
| Statins                             | 751 (73.8%) | 694(74.9%)  | 57(62.0%)   | 0.007   |
| Aspirin                             | 832 (81.7%) | 768(82.9%)  | 64(69.6%)   | 0.002   |
| VKA                                 | 221(21.7%)  | 196 (21.2%) | 25(27.2%)   | 0.18    |
| Ibravadine                          | 48(4.7%)    | 42 (4.5%)   | 6(6.5%)     | 0.43    |
| Aldosterone antagonists             | 419(41.2%)  | 383 (41.4%) | 36 (39.1%)  | 0.67    |
| Clopidogrel                         | 301(29.6%)  | 274 (29.6%) | 27(29.3%)   | 0.96    |
| Diuretics                           | 920(90.4%)  | 835(90.2%)  | 85(92.4%)   | 0.49    |
| Inotrops use during hospitalization | 156 (15.3%) | 110 (11.9%) | 46 (50.0%)  | <0.001* |

All values are given as n (%) or mean ±SD. ADCHF = Acute decompensated chronic heart failure, BMI=body mass index, CAD= coronary artery disease, TIAs=transient ischemic attacks, CKD=chronic kidney disease, HR=heart rate, SBP= systolic blood pressure, DBP= diastolic blood pressure, LVEF = Left ventricular ejection fraction, VKA= Vitamin K antagonists, ARBs= Angiotensin receptor blockers.



**Supplementary table 2:** Baseline characteristics of patients with acute de-novo heart failure and a left ventricular ejection fraction <40%, on beta-Blockers on admission.

|                                 | Patients with ADCHF with a LVEF <40% and beta-blockers on admission<br>N=260 | Beta-blockers maintained during hospitalization<br>N=224 | Beta-blockers withdrawn during hospitalization<br>N=36 | p    |
|---------------------------------|------------------------------------------------------------------------------|----------------------------------------------------------|--------------------------------------------------------|------|
| Age (years)                     | 59.8±13.8                                                                    | 60.1±13.8                                                | 57.9±13.9                                              | 0.35 |
| Male gender                     | 177(68.1%)                                                                   | 151(67.4%)                                               | 26(72.2%)                                              | 0.56 |
| BMI (kg/m <sup>2</sup> )        | 28.1±5.7                                                                     | 28.1±5.8                                                 | 28.1±5.2                                               | 0.99 |
| Hypertension                    | 181(69.6%)                                                                   | 158(70.5%)                                               | 23(63.9%)                                              | 0.42 |
| Diabetes Mellitus               | 147(56.5%)                                                                   | 123(54.9%)                                               | 24(66.7%)                                              | 0.18 |
| Hyperlipidemia                  | 106(40.8%)                                                                   | 92(41.1%)                                                | 14(38.9%)                                              | 0.80 |
| Smoking                         | 67 (25.8%)                                                                   | 60(26.8%)                                                | 7(19.4%)                                               | 0.35 |
| <b>Race</b>                     |                                                                              |                                                          |                                                        |      |
| Arabs                           | 232(89.2%)                                                                   | 201 (89.7%)                                              | 31(86.1%)                                              | 0.56 |
| Asians                          | 28(10.8%)                                                                    | 23(10.3%)                                                | 5(13.9%)                                               |      |
| Others                          | -                                                                            | -                                                        | -                                                      |      |
| <b>Past – medical history</b>   |                                                                              |                                                          |                                                        |      |
| Known CAD                       | 150(57.7%)                                                                   | 130(58.0%)                                               | 20(55.6%)                                              | 0.78 |
| Stroke /TIAs                    | 29(11.2%)                                                                    | 24(10.7%)                                                | 5(13.9%)                                               | 0.57 |
| Valvular heart disease          | 19(7.3%)                                                                     | 16(7.1%)                                                 | 3 (8.3%)                                               | 0.73 |
| Atrial fibrillation             | 23(8.8 %)                                                                    | 19(8.5%)                                                 | 4(11.1%)                                               | 0.53 |
| CKD                             | 28(10.8%)                                                                    | 22(9.8%)                                                 | 6 (16.7%)                                              | 0.24 |
| <b>Etiology</b>                 |                                                                              |                                                          |                                                        |      |
| Non-Compliance Medication       | 40(15.4%)                                                                    | 37(16.5%)                                                | 3(8.3%)                                                | 0.20 |
| IHD                             | 117(45.0%)                                                                   | 100(44.6%)                                               | 17(47.2%)                                              | 0.77 |
| HTN                             | 12(4.6%)                                                                     | 11(4.9%)                                                 | 1(2.8%)                                                | 0.99 |
| Arrhythmia                      | 11(4.2%)                                                                     | 8(3.6%)                                                  | 3(8.3%)                                                | 0.18 |
| Anemia                          | 5(1.9%)                                                                      | 5(2.2%)                                                  | 0(0.0%)                                                | 0.99 |
| Renal failure                   | 9(3.5%)                                                                      | 8(3.6%)                                                  | 1(2.8%)                                                | 0.99 |
| <b>Clinical and biochemical</b> |                                                                              |                                                          |                                                        |      |

| parameters                          |             |             |             |        |
|-------------------------------------|-------------|-------------|-------------|--------|
| HR, b.p.m                           | 94.6±22.3   | 94.6±21.2   | 94.7±28.7   | 0.99   |
| SBP, mmHg                           | 133.6±32.4  | 134.6±31.9  | 126.8±35.0  | 0.19   |
| DBP, mmHg                           | 80.5±19.3   | 81.0±18.8   | 77.6±22.4   | 0.34   |
| LVEF (%)                            | 28.8±7.2    | 29.0±7.2    | 27.5±7.4    | 0.23   |
| BNP, pg/mL                          | 5227±4924   | 5361±5046   | 3883±1614   | 0.52   |
| Creatinin, mmol/L                   | 128.5±121.9 | 124.9±123.5 | 151.1±110.2 | 0.23   |
| <b>Medications</b>                  |             |             |             |        |
| Carvedilol                          | 100 (38.5%) | 84(37.5%)   | 16(44.4%)   | 0.42   |
| Bisoprolol                          | 90 (34.6%)  | 82(36.6%)   | 8(22.2%)    | 0.09   |
| Metoprolol                          | 35 (13.5%)  | 25 (11.2%)  | 10(27.8%)   | 0.01   |
| Atenolol                            | 35 (13.5%)  | 33 (14.7%)  | 2(5.6%)     | 0.18   |
| ACE-inhibitors                      | 166(63.8%)  | 150(67.0%)  | 16(44.4%)   | 0.009  |
| ARBs                                | 23(8.8%)    | 18(8.0%)    | 5(13.9%)    | 0.33   |
| Statins                             | 180(69.2%)  | 154(68.8%)  | 26(72.2%)   | 0.67   |
| Aspirin                             | 204(78.5%)  | 176(78.6%)  | 28(77.8%)   | 0.91   |
| VKA                                 | 19(7.3%)    | 16(7.1%)    | 3(8.3%)     | 0.73   |
| Ibravadine                          | 7(2.7%)     | 7(3.1%)     | 0(0.0%)     | 0.59   |
| Aldosterone antagonists             | 45(17.3%)   | 38(17.0%)   | 7(19.4%)    | 0.71   |
| Clopidogrel                         | 81(31.2%)   | 69(30.8%)   | 12(33.3%)   | 0.76   |
| Diuretics                           | 113(43.5%)  | 98(43.8%)   | 15(41.7%)   | 0.81   |
| Inotrops use during hospitalization | 51 (19.6%)  | 32 (14.3%)  | 19 (52.8%)  | <0.001 |

All values are given as n (%) or mean ±SD. ADNHF = Acute de-novo heart failure, BMI=body mass index, CAD= coronary artery disease, TIAs=transient ischemic attacks, CKD=chronic kidney disease, HR=heart rate, SBP= systolic blood pressure, DBP= diastolic blood pressure, LVEF = Left ventricular ejection fraction, VKA= Vitamin K antagonists, ARBs= Angiotensin receptor blockers.

**Supplementary table 3:** Variables after propensity score matching on inotropes in patients with acute decompensated chronic heart failure, a left ventricular ejection fraction <40% and on beta-blockers on admission.

|                               | Beta-blockers continued<br>N=92 | Beta-blockers withdrawn<br>N=92 | p value |
|-------------------------------|---------------------------------|---------------------------------|---------|
| Age (years)                   | 60.3±12.7                       | 60.3±15.8                       | 0.98    |
| Male gender                   | 74 (80.4%)                      | 62(67.4%)                       | 0.044*  |
| Noncompliance with medication | 51 (55.4%)                      | 19 (20.7%)                      | <0.001* |
| SBP, mmHg                     | 147.5±39.8                      | 114.2±31.3                      | <0.001* |
| DBP, mmHg                     | 95.9±23.4                       | 67.8±17.2                       | <0.001* |
| LVEF (%)                      | 28.3±6.7                        | 25.6±7.6                        | 0.011*  |
| Creatinine, mmol/L            | 126.7±103.4                     | 158.5±141.4                     | 0.08    |
| Statins                       | 79 (85.9%)                      | 57(62.0%)                       | <0.001* |
| Aspirin                       | 92 (100.0%)                     | 64(69.6%)                       | <0.001* |
| Inotropes                     | 46 (50.0%)                      | 46 (50.0%)                      | 1.000   |

All values are given as n (%) or mean ±SD. SBP= systolic blood pressure, DBP= diastolic blood pressure, LVEF = Left ventricular ejection fraction.

**Supplementary table 4:** Variables after propensity score matching on inotrops in patients with acute de-novo heart failure, a left ventricular ejection fraction LVEF <40% and on beta-blockers on admission.

|                | <b>Beta-blockers continued<br/>N=36</b> | <b>Beta-blockers withdrawn<br/>n=36</b> | <b>p value</b> |
|----------------|-----------------------------------------|-----------------------------------------|----------------|
| Age            | 59.9±12.7                               | 57.9±13.9                               | 0.514          |
| Male Gender    | 11 (30.6%)                              | 10 (27.8%)                              | 0.795          |
| ACE-inhibitors | 25 (69.4%)                              | 16 (44.4%)                              | 0.032*         |
| Inotrops       | 19 (52.8%)                              | 19 (52.8%)                              | 1.000          |

All values are given as n (%) or mean ±SD.

## STROBE Statement—checklist of items that should be included in reports of observational studies

|                              | Item No | Recommendation                                                                                                                                                                                                                                                                                                                                                                                                                                                                                                                                                                                                                                                                                                                                                                |
|------------------------------|---------|-------------------------------------------------------------------------------------------------------------------------------------------------------------------------------------------------------------------------------------------------------------------------------------------------------------------------------------------------------------------------------------------------------------------------------------------------------------------------------------------------------------------------------------------------------------------------------------------------------------------------------------------------------------------------------------------------------------------------------------------------------------------------------|
| <b>Title and abstract</b>    | 1       | (a) Indicate the study's design with a commonly used term in the title or the abstract- done page 2<br>(b) Provide in the abstract an informative and balanced summary of what was done and what was found- done page 2                                                                                                                                                                                                                                                                                                                                                                                                                                                                                                                                                       |
| <b>Introduction</b>          |         |                                                                                                                                                                                                                                                                                                                                                                                                                                                                                                                                                                                                                                                                                                                                                                               |
| Background/rationale         | 2       | Explain the scientific background and rationale for the investigation being reported- done page 4                                                                                                                                                                                                                                                                                                                                                                                                                                                                                                                                                                                                                                                                             |
| Objectives                   | 3       | State specific objectives, including any prespecified hypotheses- done page 4                                                                                                                                                                                                                                                                                                                                                                                                                                                                                                                                                                                                                                                                                                 |
| <b>Methods</b>               |         |                                                                                                                                                                                                                                                                                                                                                                                                                                                                                                                                                                                                                                                                                                                                                                               |
| Study design                 | 4       | Present key elements of study design early in the paper- done page 5                                                                                                                                                                                                                                                                                                                                                                                                                                                                                                                                                                                                                                                                                                          |
| Setting                      | 5       | Describe the setting, locations, and relevant dates, including periods of recruitment, exposure, follow-up, and data collection- done page 5                                                                                                                                                                                                                                                                                                                                                                                                                                                                                                                                                                                                                                  |
| Participants                 | 6       | (a) <i>Cohort study</i> —Give the eligibility criteria, and the sources and methods of selection of participants. Describe methods of follow-up- done page 5<br><i>Case-control study</i> —Give the eligibility criteria, and the sources and methods of case ascertainment and control selection. Give the rationale for the choice of cases and controls- not applicable<br><i>Cross-sectional study</i> —Give the eligibility criteria, and the sources and methods of selection of participants. not applicable<br>(b) <i>Cohort study</i> —For matched studies, give matching criteria and number of exposed and unexposed, not applicable<br><i>Case-control study</i> —For matched studies, give matching criteria and the number of controls per case- not applicable |
| Variables                    | 7       | Clearly define all outcomes, exposures, predictors, potential confounders, and effect modifiers. Give diagnostic criteria, if applicable- done page 5                                                                                                                                                                                                                                                                                                                                                                                                                                                                                                                                                                                                                         |
| Data sources/<br>measurement | 8*      | For each variable of interest, give sources of data and details of methods of assessment (measurement). Describe comparability of assessment methods if there is more than one group- done page 5                                                                                                                                                                                                                                                                                                                                                                                                                                                                                                                                                                             |
| Bias                         | 9       | Describe any efforts to address potential sources of bias- done page 6                                                                                                                                                                                                                                                                                                                                                                                                                                                                                                                                                                                                                                                                                                        |
| Study size                   | 10      | Explain how the study size was arrived at- done page 5 to 6                                                                                                                                                                                                                                                                                                                                                                                                                                                                                                                                                                                                                                                                                                                   |
| Quantitative variables       | 11      | Explain how quantitative variables were handled in the analyses. If applicable, describe which groupings were chosen and why- done page 6                                                                                                                                                                                                                                                                                                                                                                                                                                                                                                                                                                                                                                     |
| Statistical methods          | 12      | (a) Describe all statistical methods, including those used to control for confounding- done page 6<br>(b) Describe any methods used to examine subgroups and interactions- done page 6<br>(c) Explain how missing data were addressed- done page 6<br>(d) <i>Cohort study</i> —If applicable, explain how loss to follow-up was addressed- done page 7<br><i>Case-control study</i> —If applicable, explain how matching of cases and controls was addressed not applicable<br><i>Cross-sectional study</i> —If applicable, describe analytical methods taking account of sampling strategy not applicable<br>(e) Describe any sensitivity analyses- done page 6                                                                                                              |

**Results**

|                  |     |                                                                                                                                                                                                                                |
|------------------|-----|--------------------------------------------------------------------------------------------------------------------------------------------------------------------------------------------------------------------------------|
| Participants     | 13* | (a) Report numbers of individuals at each stage of study—eg numbers potentially eligible, examined for eligibility, confirmed eligible, included in the study, completing follow-up, and analysed- page 6                      |
|                  |     | (b) Give reasons for non-participation at each stage- page 6-7                                                                                                                                                                 |
|                  |     | (c) Consider use of a flow diagram- not applicable                                                                                                                                                                             |
| Descriptive data | 14* | (a) Give characteristics of study participants (eg demographic, clinical, social) and information on exposures and potential confounders- done page 6-7 and table 1                                                            |
|                  |     | (b) Indicate number of participants with missing data for each variable of interest- done page 6-7                                                                                                                             |
|                  |     | (c) <i>Cohort study</i> —Summarise follow-up time (eg, average and total amount)- done page 7-8                                                                                                                                |
| Outcome data     | 15* | <i>Cohort study</i> —Report numbers of outcome events or summary measures over time- done table 2 and 4                                                                                                                        |
|                  |     | <i>Case-control study</i> —Report numbers in each exposure category, or summary measures of exposure-not applicable.                                                                                                           |
|                  |     | <i>Cross-sectional study</i> —Report numbers of outcome events or summary measures-not applicable                                                                                                                              |
| Main results     | 16  | (a) Give unadjusted estimates and, if applicable, confounder-adjusted estimates and their precision (eg, 95% confidence interval). Make clear which confounders were adjusted for and why they were included- done page 6 to 8 |
|                  |     | (b) Report category boundaries when continuous variables were categorized- done page 6 to 8                                                                                                                                    |
|                  |     | (c) If relevant, consider translating estimates of relative risk into absolute risk for a meaningful time period. Not applicable                                                                                               |
| Other analyses   | 17  | Report other analyses done—eg analyses of subgroups and interactions, and sensitivity analyses- done page 7-8                                                                                                                  |

**Discussion**

|                  |    |                                                                                                                                                                                                     |
|------------------|----|-----------------------------------------------------------------------------------------------------------------------------------------------------------------------------------------------------|
| Key results      | 18 | Summarise key results with reference to study objectives- done page 8                                                                                                                               |
| Limitations      | 19 | Discuss limitations of the study, taking into account sources of potential bias or imprecision. Discuss both direction and magnitude of any potential bias - done page 10.                          |
| Interpretation   | 20 | Give a cautious overall interpretation of results considering objectives, limitations, multiplicity of analyses, results from similar studies, and other relevant evidence- done pages from 8 to 10 |
| Generalisability | 21 | Discuss the generalisability (external validity) of the study results- done page 10                                                                                                                 |

**Other information**

|         |    |                                                                                                                                                                              |
|---------|----|------------------------------------------------------------------------------------------------------------------------------------------------------------------------------|
| Funding | 22 | Give the source of funding and the role of the funders for the present study and, if applicable, for the original study on which the present article is based- done page 13. |
|---------|----|------------------------------------------------------------------------------------------------------------------------------------------------------------------------------|

\*Give information separately for cases and controls in case-control studies and, if applicable, for exposed and unexposed groups in cohort and cross-sectional studies.

**Note:** An Explanation and Elaboration article discusses each checklist item and gives methodological background and published examples of transparent reporting. The STROBE checklist is best used in conjunction with this article (freely available on the Web sites of PLoS Medicine at <http://www.plosmedicine.org/>, Annals of Internal Medicine at <http://www.annals.org/>, and Epidemiology at <http://www.epidem.com/>). Information on the STROBE Initiative is available at [www.strobe-statement.org](http://www.strobe-statement.org).
