# Supplementary material for: Non-withdrawal of beta blockers in acute decompensated chronic and de novo heart failure with reduced ejection fraction in a prospective multicentre study of patients with acute heart failure in the Middle East
Source: PubMed Central journal article supplement — BMJ Open. 2017 Jul 9;7(7):e014915. doi: 10.1136/bmjopen-2016-014915 (PMC5734353; doi:10.1136/bmjopen-2016-014915), 2017-07-09
Supplement: bmjopen-2016-014915supp001.pdf [file bmjopen-2016-014915supp001.pdf]

**Supplementary table 1:** Baseline characteristics of patients with acute decompensated chronic heart failure and a left ventricular ejection fraction <40%, on beta-blockers on admission

|                                            | <b>Patients with ADCHF with a LVEF &lt;40% and beta-blockers on admission<br/>N=1018</b> | <b>Beta-blockers maintained during hospitalization<br/>N=926</b> | <b>Beta-blockers withdrawn during hospitalization<br/>N=92</b> | <b>p value</b> |
|--------------------------------------------|------------------------------------------------------------------------------------------|------------------------------------------------------------------|----------------------------------------------------------------|----------------|
| Age (years)                                | 61.0±13.9                                                                                | 61.1±13.7                                                        | 60.3±15.8                                                      | 0.64           |
| Male gender                                | 751(73.8%)                                                                               | 689(74.4%)                                                       | 62(67.4%)                                                      | 0.14           |
| BMI (kg/m <sup>2</sup> )                   | 27.7±5.8                                                                                 | 27.6±5.8                                                         | 28.3±5.7                                                       | 0.28           |
| Hypertension                               | 673(66.1%)                                                                               | 620(67.0%)                                                       | 53(57.6%)                                                      | 0.07           |
| Diabetes Mellitus                          | 569(55.9%)                                                                               | 518(55.9%)                                                       | 51(55.4%)                                                      | 0.92           |
| Hyperlipidemia                             | 464(45.6%)                                                                               | 419(45.2%)                                                       | 45(48.9%)                                                      | 0.50           |
| Smoking                                    | 162(15.9%)                                                                               | 149(16.1%)                                                       | 13(14.1%)                                                      | 0.62           |
| <b>Race</b>                                |                                                                                          |                                                                  |                                                                |                |
| Arabs                                      | 937 (92.0%)                                                                              | 852(92.0%)                                                       | 85(92.4%)                                                      | 0.37           |
| Asians                                     | 77(7.6%)                                                                                 | 71(7.7%)                                                         | 6(6.5%)                                                        |                |
| Others                                     | 4(0.4%)                                                                                  | 3(0.3%)                                                          | 1(1.1%)                                                        |                |
| <b>Past – medical history</b>              |                                                                                          |                                                                  |                                                                |                |
| Known CAD                                  | 676(66.4%)                                                                               | 617(66.6%)                                                       | 59(64.1%)                                                      | 0.62           |
| Stroke /TIAs                               | 96(9.4%)                                                                                 | 89(9.6%)                                                         | 7(7.6%)                                                        | 0.53           |
| Valvular heart disease                     | 154(15.1%)                                                                               | 139(15.0%)                                                       | 15(16.3%)                                                      | 0.74           |
| Atrial fibrillation                        | 170(16.7%)                                                                               | 157(17.0%)                                                       | 13(14.1%)                                                      | 0.48           |
| CKD                                        | 215(21.1%)                                                                               | 192(20.7%)                                                       | 23(25.0%)                                                      | 0.33           |
| <b>Etiology</b>                            |                                                                                          |                                                                  |                                                                |                |
| Non-Compliance Medication                  | 300(29.5%)                                                                               | 281(30.3%)                                                       | 19(20.7%)                                                      | 0.052          |
| IHD                                        | 204(20,0%)                                                                               | 184(19.9%)                                                       | 20(21.7%)                                                      | 0.66           |
| HTN                                        | 46(4.5%)                                                                                 | 44(4.8%)                                                         | 2(2.2%)                                                        | 0.42           |
| Arrhythmia                                 | 61(6.0%)                                                                                 | 57(6.2%)                                                         | 4(4.3%)                                                        | 0.48           |
| Anemia                                     | 23(2.3%)                                                                                 | 20(2.2%)                                                         | 3(3.3%)                                                        | 0.45           |
| Renal failure                              | 58(5.7%)                                                                                 | 50(5.4%)                                                         | 8(8.7%)                                                        | 0.19           |
| <b>Clinical and biochemical parameters</b> |                                                                                          |                                                                  |                                                                |                |

|                                     |             |             |             |         |
|-------------------------------------|-------------|-------------|-------------|---------|
| HR, b.p.m                           | 94.4±22.4   | 94.8±22.5   | 91.1±21.2   | 0.14    |
| SBP, mmHg                           | 126.6±30.6  | 127.8±30.3  | 114.2±31.3  | <0.001  |
| DBP, mmHg                           | 76.4±17.9   | 77.2±17.8   | 67.8±17.2   | <0.001  |
| LVEF (%)                            | 26.6±7.1    | 26.7±7.1    | 25.6±7.6    | 0.16    |
| BNP, pg/mL                          | 6847±9679   | 6851±9831   | 6777±7271   | 0.97    |
| Creatinin, mmol/L                   | 137.7±116.3 | 135.7±113.4 | 158.5±141.4 | 0.07    |
| <b>Medications</b>                  |             |             |             |         |
| Carvedilol                          | 649(63.8%)  | 589 (63.6%) | 60(65.2%)   | 0.75    |
| Bisoprolol                          | 286 (28.1%) | 265(28.6%)  | 21(22.8%)   | 0.23    |
| Metoprolol                          | 64 (6.3%)   | 57(6.2%)    | 7(7.6%)     | 0.58    |
| Atenolol                            | 19 (1.9%)   | 15(1.6%)    | 4(4.3%)     | 0.08    |
| ACE-inhibitors                      | 652(64.0%)  | 600(64.8%)  | 52(56.5%)   | 0.11    |
| ARBs                                | 180(17.7%)  | 167 (18.0%) | 13(14.1%)   | 0.34    |
| Statins                             | 751 (73.8%) | 694(74.9%)  | 57(62.0%)   | 0.007   |
| Aspirin                             | 832 (81.7%) | 768(82.9%)  | 64(69.6%)   | 0.002   |
| VKA                                 | 221(21.7%)  | 196 (21.2%) | 25(27.2%)   | 0.18    |
| Ibravadine                          | 48(4.7%)    | 42 (4.5%)   | 6(6.5%)     | 0.43    |
| Aldosterone antagonists             | 419(41.2%)  | 383 (41.4%) | 36 (39.1%)  | 0.67    |
| Clopidogrel                         | 301(29.6%)  | 274 (29.6%) | 27(29.3%)   | 0.96    |
| Diuretics                           | 920(90.4%)  | 835(90.2%)  | 85(92.4%)   | 0.49    |
| Inotrops use during hospitalization | 156 (15.3%) | 110 (11.9%) | 46 (50.0%)  | <0.001* |

All values are given as n (%) or mean ±SD. ADCHF = Acute decompensated chronic heart failure, BMI=body mass index, CAD= coronary artery disease, TIAs=transient ischemic attacks, CKD=chronic kidney disease, HR=heart rate, SBP= systolic blood pressure, DBP= diastolic blood pressure, LVEF = Left ventricular ejection fraction, VKA= Vitamin K antagonists, ARBs= Angiotensin receptor blockers.

**Supplementary table 2:** Baseline characteristics of patients with acute de-novo heart failure and a left ventricular ejection fraction <40%, on beta-Blockers on admission.

|                                 | <b>Patients with ADCHF with a LVEF &lt;40% and beta-blockers on admission<br/>N=260</b> | <b>Beta-blockers maintained during hospitalization<br/>N=224</b> | <b>Beta-blockers withdrawn during hospitalization<br/>N=36</b> | <b>p</b> |
|---------------------------------|-----------------------------------------------------------------------------------------|------------------------------------------------------------------|----------------------------------------------------------------|----------|
| Age (years)                     | 59.8±13.8                                                                               | 60.1±13.8                                                        | 57.9±13.9                                                      | 0.35     |
| Male gender                     | 177(68.1%)                                                                              | 151(67.4%)                                                       | 26(72.2%)                                                      | 0.56     |
| BMI (kg/m <sup>2</sup> )        | 28.1±5.7                                                                                | 28.1±5.8                                                         | 28.1±5.2                                                       | 0.99     |
| Hypertension                    | 181(69.6%)                                                                              | 158(70.5%)                                                       | 23(63.9%)                                                      | 0.42     |
| Diabetes Mellitus               | 147(56.5%)                                                                              | 123(54.9%)                                                       | 24(66.7%)                                                      | 0.18     |
| Hyperlipidemia                  | 106(40.8%)                                                                              | 92(41.1%)                                                        | 14(38.9%)                                                      | 0.80     |
| Smoking                         | 67 (25.8%)                                                                              | 60(26.8%)                                                        | 7(19.4%)                                                       | 0.35     |
| <b>Race</b>                     |                                                                                         |                                                                  |                                                                |          |
| Arabs                           | 232(89.2%)                                                                              | 201 (89.7%)                                                      | 31(86.1%)                                                      | 0.56     |
| Asians                          | 28(10.8%)                                                                               | 23(10.3%)                                                        | 5(13.9%)                                                       |          |
| Others                          | -                                                                                       | -                                                                | -                                                              |          |
| <b>Past – medical history</b>   |                                                                                         |                                                                  |                                                                |          |
| Known CAD                       | 150(57.7%)                                                                              | 130(58.0%)                                                       | 20(55.6%)                                                      | 0.78     |
| Stroke /TIAs                    | 29(11.2%)                                                                               | 24(10.7%)                                                        | 5(13.9%)                                                       | 0.57     |
| Valvular heart disease          | 19(7.3%)                                                                                | 16(7.1%)                                                         | 3 (8.3%)                                                       | 0.73     |
| Atrial fibrillation             | 23(8.8 %)                                                                               | 19(8.5%)                                                         | 4(11.1%)                                                       | 0.53     |
| CKD                             | 28(10.8%)                                                                               | 22(9.8%)                                                         | 6 (16.7%)                                                      | 0.24     |
| <b>Etiology</b>                 |                                                                                         |                                                                  |                                                                |          |
| Non-Compliance Medication       | 40(15.4%)                                                                               | 37(16.5%)                                                        | 3(8.3%)                                                        | 0.20     |
| IHD                             | 117(45.0%)                                                                              | 100(44.6%)                                                       | 17(47.2%)                                                      | 0.77     |
| HTN                             | 12(4.6%)                                                                                | 11(4.9%)                                                         | 1(2.8%)                                                        | 0.99     |
| Arrhythmia                      | 11(4.2%)                                                                                | 8(3.6%)                                                          | 3(8.3%)                                                        | 0.18     |
| Anemia                          | 5(1.9%)                                                                                 | 5(2.2%)                                                          | 0(0.0%)                                                        | 0.99     |
| Renal failure                   | 9(3.5%)                                                                                 | 8(3.6%)                                                          | 1(2.8%)                                                        | 0.99     |
| <b>Clinical and biochemical</b> |                                                                                         |                                                                  |                                                                |          |

| <b>parameters</b>                   |             |             |             |        |
|-------------------------------------|-------------|-------------|-------------|--------|
| HR, b.p.m                           | 94.6±22.3   | 94.6±21.2   | 94.7±28.7   | 0.99   |
| SBP, mmHg                           | 133.6±32.4  | 134.6±31.9  | 126.8±35.0  | 0.19   |
| DBP, mmHg                           | 80.5±19.3   | 81.0±18.8   | 77.6±22.4   | 0.34   |
| LVEF (%)                            | 28.8±7.2    | 29.0±7.2    | 27.5±7.4    | 0.23   |
| BNP, pg/mL                          | 5227±4924   | 5361±5046   | 3883±1614   | 0.52   |
| Creatinin, mmol/L                   | 128.5±121.9 | 124.9±123.5 | 151.1±110.2 | 0.23   |
| <b>Medications</b>                  |             |             |             |        |
| Carvedilol                          | 100 (38.5%) | 84(37.5%)   | 16(44.4%)   | 0.42   |
| Bisoprolol                          | 90 (34.6%)  | 82(36.6%)   | 8(22.2%)    | 0.09   |
| Metoprolol                          | 35 (13.5%)  | 25 (11.2%)  | 10(27.8%)   | 0.01   |
| Atenolol                            | 35 (13.5%)  | 33 (14.7%)  | 2(5.6%)     | 0.18   |
| ACE-inhibitors                      | 166(63.8%)  | 150(67.0%)  | 16(44.4%)   | 0.009  |
| ARBs                                | 23(8.8%)    | 18(8.0%)    | 5(13.9%)    | 0.33   |
| Statins                             | 180(69.2%)  | 154(68.8%)  | 26(72.2%)   | 0.67   |
| Aspirin                             | 204(78.5%)  | 176(78.6%)  | 28(77.8%)   | 0.91   |
| VKA                                 | 19(7.3%)    | 16(7.1%)    | 3(8.3%)     | 0.73   |
| Ibravadine                          | 7(2.7%)     | 7(3.1%)     | 0(0.0%)     | 0.59   |
| Aldosterone antagonists             | 45(17.3%)   | 38(17.0%)   | 7(19.4%)    | 0.71   |
| Clopidogrel                         | 81(31.2%)   | 69(30.8%)   | 12(33.3%)   | 0.76   |
| Diuretics                           | 113(43.5%)  | 98(43.8%)   | 15(41.7%)   | 0.81   |
| Inotrops use during hospitalization | 51 (19.6%)  | 32 (14.3%)  | 19 (52.8%)  | <0.001 |

All values are given as n (%) or mean ±SD. ADNHF = Acute de-novo heart failure, BMI=body mass index, CAD= coronary artery disease, TIAs=transient ischemic attacks, CKD=chronic kidney disease, HR=heart rate, SBP= systolic blood pressure, DBP= diastolic blood pressure, LVEF = Left ventricular ejection fraction, VKA= Vitamin K antagonists, ARBs= Angiotensin receptor blockers.

**Supplementary table 3:** Variables after propensity score matching on inotropes in patients with acute decompensated chronic heart failure, a left ventricular ejection fraction <40% and on beta-blockers on admission.

|                               | <b>Beta-blockers continued<br/>N=92</b> | <b>Beta-blockers withdrawn<br/>N=92</b> | <b>p value</b> |
|-------------------------------|-----------------------------------------|-----------------------------------------|----------------|
| Age (years)                   | 60.3±12.7                               | 60.3±15.8                               | 0.98           |
| Male gender                   | 74 (80.4%)                              | 62(67.4%)                               | 0.044*         |
| Noncompliance with medication | 51 (55.4%)                              | 19 (20.7%)                              | <0.001*        |
| SBP, mmHg                     | 147.5±39.8                              | 114.2±31.3                              | <0.001*        |
| DBP, mmHg                     | 95.9±23.4                               | 67.8±17.2                               | <0.001*        |
| LVEF (%)                      | 28.3±6.7                                | 25.6±7.6                                | 0.011*         |
| Creatinine, mmol/L            | 126.7±103.4                             | 158.5±141.4                             | 0.08           |
| Statins                       | 79 (85.9%)                              | 57(62.0%)                               | <0.001*        |
| Aspirin                       | 92 (100.0%)                             | 64(69.6%)                               | <0.001*        |
| Inotropes                     | 46 (50.0%)                              | 46 (50.0%)                              | 1.000          |

All values are given as n (%) or mean ±SD. SBP= systolic blood pressure, DBP= diastolic blood pressure, LVEF = Left ventricular ejection fraction.

**Supplementary table 4:** Variables after propensity score matching on inotrops in patients with acute de-novo heart failure, a left ventricular ejection fraction LVEF <40% and on beta-blockers on admission.

|                | <b>Beta-blockers continued<br/>N=36</b> | <b>Beta-blockers withdrawn<br/>n=36</b> | <b>p value</b> |
|----------------|-----------------------------------------|-----------------------------------------|----------------|
| Age            | 59.9±12.7                               | 57.9±13.9                               | 0.514          |
| Male Gender    | 11 (30.6%)                              | 10 (27.8%)                              | 0.795          |
| ACE-inhibitors | 25 (69.4%)                              | 16 (44.4%)                              | 0.032*         |
| Inotrops       | 19 (52.8%)                              | 19 (52.8%)                              | 1.000          |

All values are given as n (%) or mean ±SD.
